# Supplementary material
Source: PubMed Central journal article supplement (PMC6124518)
Supplement: jciinsight-3-121537-s252.pdf [file jciinsight-3-121537-s252.pdf]

## *Supplementary Tables 1-5*

### **Brain-wide glymphatic enhancement and clearance in humans assessed with MRI**

**Geir Ringstad<sup>a,b</sup>, Lars M. Valnes<sup>c</sup>, Anders M. Dale<sup>d,e,f</sup>, Are H. Pripp<sup>g</sup>, Svein-Are S. Vatnehol<sup>h</sup>, Kyrre E. Emblem<sup>i</sup>, Kent-Andre Mardal<sup>c,j</sup>, Per K. Eide<sup>b,k\*</sup>**

<sup>a</sup>Division of Radiology and Nuclear Medicine, Department of Radiology, Oslo University Hospital - Rikshospitalet, Oslo, Norway.

<sup>b</sup>Institute of Clinical Medicine, Faculty of Medicine, University of Oslo, Oslo, Norway.

<sup>c</sup>Department of Mathematics, University of Oslo, Oslo, Norway

<sup>d</sup>Department of Neurosciences, University of California San Diego, La Jolla, CA, USA.

<sup>e</sup>Department of Radiology, University of California, San Diego, La Jolla, CA, USA.

<sup>f</sup>Multimodal Imaging Laboratory, UC San Diego, La Jolla, CA, USA.

<sup>g</sup>Oslo Centre of Biostatistics and Epidemiology, Research Support Services, Oslo University Hospital, Oslo, Norway.

<sup>h</sup>The Intervention Centre, Oslo University Hospital – Rikshospitalet, Oslo, Norway.

<sup>i</sup>Department of Diagnostic Physics, Oslo University Hospital, Oslo, Norway.

<sup>j</sup>Center for Biomedical Computing, Simula Research Laboratory, Lysaker, Norway.

<sup>k</sup>Department of Neurosurgery, Oslo University Hospital – Rikshospitalet, Oslo, Norway.

**Table S1.** Demographic and clinical information about the REF and iNPH cohorts at the time MRI

|                                                   | REF         | iNPH        | Significance |
|---------------------------------------------------|-------------|-------------|--------------|
| <i>N</i>                                          | 8           | 9           |              |
| <i>Sex (F/M)</i>                                  | 6/2         | 1/8         | =0.008       |
| <i>Age (years)</i>                                | 38.4 ± 17.3 | 68.3 ± 9.5  | <0.001       |
| <i>Symptoms reported by patient and/or family</i> |             |             |              |
| Gait disturbance                                  | 2 (25%)     | 9 (100%)    | =0.001       |
| Urinary incontinence                              | 0 (0%)      | 6 (67%)     | =0.004       |
| Cognitive impairment                              | 0 (0%)      | 8 (89%)     | <0.001       |
| Headache                                          | 5 (63%)     | 1 (11%)     | =0.03        |
| Dizziness                                         | 2 (25%)     | 3 (33%)     | ns           |
| Lethargy                                          | 0 (0%)      | 1 (11%)     | ns           |
| Duration of symptoms (months)                     | 42.4 ± 40.6 | 21.3 ± 10.4 | ns           |
| NPH-score                                         | 15 (14-15)  | 13 (11-13)  | <0.001       |
| <i>Tests of cognitive function</i>                |             |             |              |
| Mini-mental state (MMS)                           | -           | 28 (23-28)  | -            |
| Montreal Cognitive Assessment (MoCA)              | -           | 23 (20-25)  | -            |

Categorical data presented as numbers; continuous data presented as mean ± standard deviation. Significant differences between groups were determined by Pearson Chi-square test for categorical data and by independent samples t-test for continuous data. iNPH: Idiopathic normal pressure hydrocephalus. REF: Reference patients.

**Table S2.** Percentage change in normalized T1 signals at various time points after intrathecal gadobutrol in REF individuals

| SegID                                    | StructName                      | Time after intrathecal gadobutrol |   |    |         |   |    |       |   |       |     |      |     | *Sign |      |    |         |    |   |    |        |
|------------------------------------------|---------------------------------|-----------------------------------|---|----|---------|---|----|-------|---|-------|-----|------|-----|-------|------|----|---------|----|---|----|--------|
|                                          |                                 | 1.5 - 2 h                         |   |    | 2 - 4 h |   |    | 4-6 h |   | 6-9 h |     | 24 h |     |       | 48 h |    | 4 weeks |    |   |    |        |
| <i>Some cortical grey matter regions</i> |                                 |                                   |   |    |         |   |    |       |   |       |     |      |     |       |      |    |         |    |   |    |        |
| 1002                                     | ctx-lh-caudalanteriorcingulate  | -3                                | ± | 8  | -2      | ± | 15 | 32    | ± | 54    | 64  | ±    | 62  | 63    | ±    | 60 | 70      | -2 | ± | 19 | <0.001 |
| 1003                                     | ctx-lh-caudalmiddlefrontal      | -3                                | ± | 9  | -5      | ± | 16 | 6     | ± | 32    | 2   | ±    | 30  | 43    | ±    | 65 | 36      | -6 | ± | 20 | <0.001 |
| 1005                                     | ctx-lh-cuneus                   | 1                                 | ± | 8  | -1      | ± | 13 | 13    | ± | 42    | 34  | ±    | 51  | 47    | ±    | 55 | 85      | -5 | ± | 19 | 0.088  |
| 1006                                     | ctx-lh-entorhinal               | 1                                 | ± | 6  | 6       | ± | 16 | 58    | ± | 61    | 87  | ±    | 75  | 59    | ±    | 50 | 52      | -6 | ± | 17 | 0.001  |
| 1032                                     | ctx-lh-frontalpole              | 0                                 | ± | 10 | -4      | ± | 13 | 10    | ± | 19    | 32  | ±    | 41  | 94    | ±    | 78 | 106     | 0  | ± | 20 | <0.001 |
| 1007                                     | ctx-lh-fusiform                 | 1                                 | ± | 8  | 1       | ± | 16 | 21    | ± | 41    | 35  | ±    | 55  | 41    | ±    | 51 | 51      | -7 | ± | 18 | 0.151  |
| 1008                                     | ctx-lh-inferiorparietal         | -3                                | ± | 7  | -6      | ± | 14 | 1     | ± | 24    | 1   | ±    | 19  | 32    | ±    | 49 | 38      | -6 | ± | 19 | 0.035  |
| 1009                                     | ctx-lh-inferiortemporal         | -2                                | ± | 8  | -4      | ± | 16 | 11    | ± | 36    | 8   | ±    | 36  | 34    | ±    | 52 | 34      | -8 | ± | 18 | 0.034  |
| 1035                                     | ctx-lh-insula                   | -1                                | ± | 8  | 4       | ± | 20 | 56    | ± | 74    | 88  | ±    | 91  | 62    | ±    | 62 | 60      | -6 | ± | 18 | 0.007  |
| 1010                                     | ctx-lh-isthmuscingulate         | -1                                | ± | 7  | -1      | ± | 14 | 21    | ± | 40    | 36  | ±    | 46  | 40    | ±    | 43 | 64      | -6 | ± | 18 | 0.021  |
| 1011                                     | ctx-lh-lateraloccipital         | 2                                 | ± | 5  | -2      | ± | 12 | -1    | ± | 20    | 1   | ±    | 15  | 19    | ±    | 29 | 32      | -4 | ± | 20 | 0.223  |
| 1012                                     | ctx-lh-lateralorbitofrontal     | -2                                | ± | 6  | 1       | ± | 14 | 44    | ± | 56    | 80  | ±    | 63  | 68    | ±    | 58 | 62      | -5 | ± | 18 | <0.001 |
| 1013                                     | ctx-lh-lingual                  | 3                                 | ± | 7  | 2       | ± | 14 | 14    | ± | 28    | 31  | ±    | 40  | 42    | ±    | 47 | 62      | -5 | ± | 19 | 0.100  |
| 1014                                     | ctx-lh-medialorbitofrontal      | -2                                | ± | 4  | 6       | ± | 18 | 68    | ± | 78    | 121 | ±    | 92  | 79    | ±    | 66 | 76      | -4 | ± | 17 | <0.001 |
| 1015                                     | ctx-lh-middletemporal           | -4                                | ± | 9  | -5      | ± | 16 | 12    | ± | 41    | 12  | ±    | 40  | 50    | ±    | 67 | 69      | -8 | ± | 17 | 0.025  |
| 1017                                     | ctx-lh-paracentral              | -4                                | ± | 8  | -5      | ± | 14 | 11    | ± | 40    | 16  | ±    | 44  | 43    | ±    | 46 | 27      | -5 | ± | 19 | <0.001 |
| 1016                                     | ctx-lh-parahippocampal          | 1                                 | ± | 7  | 17      | ± | 37 | 77    | ± | 92    | 97  | ±    | 100 | 54    | ±    | 52 | 45      | -6 | ± | 18 | <0.001 |
| 1018                                     | ctx-lh-parsopercularis          | -4                                | ± | 8  | -4      | ± | 16 | 25    | ± | 51    | 36  | ±    | 59  | 58    | ±    | 62 | 60      | -6 | ± | 18 | 0.038  |
| 1019                                     | ctx-lh-parsorbitalis            | -2                                | ± | 7  | -4      | ± | 14 | 18    | ± | 34    | 38  | ±    | 38  | 73    | ±    | 65 | 68      | -3 | ± | 21 | <0.001 |
| 1020                                     | ctx-lh-parstriangularis         | -4                                | ± | 9  | -5      | ± | 15 | 10    | ± | 32    | 19  | ±    | 34  | 59    | ±    | 57 | 68      | -5 | ± | 20 | 0.007  |
| 1021                                     | ctx-lh-pericalcarine            | 2                                 | ± | 5  | -1      | ± | 13 | 15    | ± | 45    | 37  | ±    | 54  | 40    | ±    | 47 | 64      | -5 | ± | 19 | 0.084  |
| 1022                                     | ctx-lh-postcentral              | -6                                | ± | 9  | -5      | ± | 16 | 18    | ± | 47    | 23  | ±    | 52  | 49    | ±    | 64 | 56      | -8 | ± | 18 | <0.001 |
| 1023                                     | ctx-lh-posteriorcingulate       | -3                                | ± | 6  | -4      | ± | 14 | 20    | ± | 53    | 32  | ±    | 57  | 49    | ±    | 48 | 54      | -6 | ± | 18 | <0.001 |
| 1024                                     | ctx-lh-precentral               | -5                                | ± | 8  | -5      | ± | 16 | 15    | ± | 41    | 18  | ±    | 45  | 45    | ±    | 60 | 50      | -6 | ± | 19 | <0.001 |
| 1025                                     | ctx-lh-precuneus                | -2                                | ± | 7  | -4      | ± | 13 | 10    | ± | 34    | 17  | ±    | 40  | 40    | ±    | 46 | 67      | -6 | ± | 19 | 0.001  |
| 1026                                     | ctx-lh-rostralanteriorcingulate | -4                                | ± | 7  | 3       | ± | 17 | 61    | ± | 82    | 105 | ±    | 90  | 70    | ±    | 66 | 71      | -4 | ± | 17 | <0.001 |
| 1027                                     | ctx-lh-rostralmiddlefrontal     | -3                                | ± | 9  | -5      | ± | 15 | 1     | ± | 22    | 2   | ±    | 13  | 53    | ±    | 53 | 56      | -3 | ± | 21 | <0.001 |
| 1028                                     | ctx-lh-superiorfrontal          | -4                                | ± | 8  | -5      | ± | 13 | 11    | ± | 35    | 16  | ±    | 42  | 56    | ±    | 54 | 53      | -4 | ± | 19 | <0.001 |
| 1029                                     | ctx-lh-superiorparietal         | -2                                | ± | 8  | -6      | ± | 14 | 3     | ± | 24    | 5   | ±    | 22  | 37    | ±    | 57 | 35      | -5 | ± | 19 | <0.001 |
| 1030                                     | ctx-lh-superiortemporal         | -4                                | ± | 9  | -2      | ± | 17 | 34    | ± | 61    | 56  | ±    | 68  | 63    | ±    | 71 | 74      | -7 | ± | 18 | 0.056  |
| 1031                                     | ctx-lh-supramarginal            | -6                                | ± | 8  | -6      | ± | 16 | 15    | ± | 44    | 22  | ±    | 47  | 51    | ±    | 66 | 64      | -9 | ± | 18 | 0.083  |
| 1033                                     | ctx-lh-temporalpole             | -1                                | ± | 6  | 3       | ± | 15 | 44    | ± | 58    | 86  | ±    | 73  | 72    | ±    | 64 | 82      | -6 | ± | 19 | 0.010  |
| 1034                                     | ctx-lh-transversetemporal       | -3                                | ± | 9  | 2       | ± | 22 | 49    | ± | 71    | 75  | ±    | 86  | 47    | ±    | 55 | 60      | -8 | ± | 17 | 0.001  |
| 2002                                     | ctx-rh-caudalanteriorcingulate  | -5                                | ± | 8  | -3      | ± | 14 | 28    | ± | 50    | 68  | ±    | 66  | 63    | ±    | 60 | 70      | -4 | ± | 18 | <0.001 |
| 2003                                     | ctx-rh-                         | -6                                | ± | 7  | -7      | ± | 14 | 7     | ± | 35    | 7   | ±    | 44  | 44    | ±    | 67 | 68      | -6 | ± | 17 | <0.001 |

|      |                                         |    |   |    |    |   |    |    |   |     |     |   |     |    |   |    |     |     |   |    |        |
|------|-----------------------------------------|----|---|----|----|---|----|----|---|-----|-----|---|-----|----|---|----|-----|-----|---|----|--------|
|      | caudalmiddlefrontal                     |    |   |    |    |   |    |    |   |     |     |   |     |    |   |    |     |     |   |    |        |
| 2005 | ctx-rh-cuneus                           | 2  | ± | 8  | 0  | ± | 14 | 9  | ± | 30  | 22  | ± | 36  | 46 | ± | 55 | 94  | -4  | ± | 19 | 0.001  |
| 2006 | ctx-rh-entorhinal                       | -2 | ± | 7  | 5  | ± | 17 | 63 | ± | 62  | 97  | ± | 75  | 59 | ± | 52 | 46  | -8  | ± | 16 | <0.001 |
| 2032 | ctx-rh-frontalpole                      | -2 | ± | 7  | -3 | ± | 13 | 7  | ± | 17  | 28  | ± | 25  | 93 | ± | 75 | 128 | 0   | ± | 21 | 0.088  |
| 2007 | ctx-rh-fusiform                         | -3 | ± | 6  | -1 | ± | 17 | 24 | ± | 44  | 37  | ± | 57  | 42 | ± | 52 | 43  | -9  | ± | 15 | 0.001  |
| 2008 | ctx-rh-inferiorparietal                 | -3 | ± | 7  | -6 | ± | 13 | 3  | ± | 28  | 1   | ± | 29  | 28 | ± | 49 | 31  | -8  | ± | 16 | <0.001 |
| 2009 | ctx-rh-inferiortemporal                 | -6 | ± | 7  | -6 | ± | 14 | 5  | ± | 31  | 6   | ± | 28  | 32 | ± | 50 | 35  | -10 | ± | 16 | 0.091  |
| 2035 | ctx-rh-insula                           | -5 | ± | 7  | 2  | ± | 22 | 54 | ± | 72  | 91  | ± | 92  | 57 | ± | 61 | 47  | -7  | ± | 16 | 0.004  |
| 2010 | ctx-rh-isthmuscingulate                 | 0  | ± | 7  | 1  | ± | 16 | 32 | ± | 48  | 57  | ± | 66  | 45 | ± | 50 | 80  | -6  | ± | 18 | 0.013  |
| 2011 | ctx-rh-lateraloccipital                 | 1  | ± | 5  | -2 | ± | 12 | -2 | ± | 20  | 1   | ± | 15  | 17 | ± | 26 | 27  | -7  | ± | 17 | 0.007  |
| 2012 | ctx-rh-lateralorbitofrontal             | -4 | ± | 6  | 0  | ± | 16 | 51 | ± | 59  | 97  | ± | 72  | 67 | ± | 56 | 71  | -6  | ± | 16 | 0.008  |
| 2013 | ctx-rh-lingual                          | 2  | ± | 6  | 4  | ± | 18 | 17 | ± | 32  | 42  | ± | 56  | 44 | ± | 56 | 69  | -5  | ± | 17 | 0.151  |
| 2014 | ctx-rh-medialorbitofrontal              | -3 | ± | 5  | 4  | ± | 17 | 63 | ± | 71  | 123 | ± | 89  | 79 | ± | 66 | 82  | -5  | ± | 16 | <0.001 |
| 2015 | ctx-rh-middletemporal                   | -8 | ± | 6  | -8 | ± | 13 | 6  | ± | 34  | 9   | ± | 38  | 42 | ± | 65 | 54  | -9  | ± | 17 | 0.091  |
| 2017 | ctx-rh-paracentral                      | -4 | ± | 6  | -7 | ± | 13 | 9  | ± | 37  | 13  | ± | 40  | 41 | ± | 45 | 33  | -6  | ± | 18 | <0.001 |
| 2016 | ctx-rh-parahippocampal                  | -1 | ± | 8  | 21 | ± | 52 | 82 | ± | 100 | 104 | ± | 105 | 55 | ± | 54 | 40  | -8  | ± | 17 | 0.003  |
| 2018 | ctx-rh-parsopercularis                  | -8 | ± | 7  | -6 | ± | 16 | 31 | ± | 69  | 44  | ± | 78  | 55 | ± | 66 | 66  | -8  | ± | 16 | <0.001 |
| 2019 | ctx-rh-parsorbitalis                    | -6 | ± | 6  | -8 | ± | 12 | 24 | ± | 48  | 46  | ± | 59  | 70 | ± | 64 | 81  | -5  | ± | 18 | 0.008  |
| 2020 | ctx-rh-parstriangularis                 | -7 | ± | 6  | -7 | ± | 14 | 22 | ± | 51  | 41  | ± | 63  | 62 | ± | 64 | 74  | -7  | ± | 17 | 0.112  |
| 2021 | ctx-rh-pericalcarine                    | 2  | ± | 5  | 0  | ± | 14 | 14 | ± | 41  | 26  | ± | 46  | 40 | ± | 51 | 82  | -6  | ± | 18 | <0.001 |
| 2022 | ctx-rh-postcentral                      | -7 | ± | 7  | -6 | ± | 14 | 24 | ± | 64  | 35  | ± | 72  | 52 | ± | 70 | 66  | -8  | ± | 17 | 0.038  |
| 2023 | ctx-rh-posteriorcingulate               | -3 | ± | 7  | -5 | ± | 13 | 16 | ± | 41  | 29  | ± | 47  | 52 | ± | 53 | 62  | -4  | ± | 19 | 0.232  |
| 2024 | ctx-rh-precentral                       | -7 | ± | 7  | -6 | ± | 14 | 18 | ± | 51  | 23  | ± | 61  | 46 | ± | 63 | 60  | -8  | ± | 16 | 0.005  |
| 2025 | ctx-rh-precuneus                        | -2 | ± | 7  | -4 | ± | 13 | 10 | ± | 34  | 20  | ± | 38  | 45 | ± | 51 | 84  | -6  | ± | 18 | <0.001 |
| 2026 | ctx-rh-rostralanteriorcingulate         | -5 | ± | 7  | 1  | ± | 17 | 60 | ± | 77  | 103 | ± | 92  | 67 | ± | 61 | 73  | -5  | ± | 16 | <0.001 |
| 2027 | ctx-rh-rostralmiddlefrontal             | -6 | ± | 7  | -7 | ± | 14 | 1  | ± | 21  | 2   | ± | 17  | 57 | ± | 53 | 91  | -3  | ± | 18 | 0.014  |
| 2028 | ctx-rh-superiorfrontal                  | -4 | ± | 7  | -5 | ± | 14 | 5  | ± | 25  | 11  | ± | 30  | 54 | ± | 55 | 68  | -3  | ± | 19 | <0.001 |
| 2029 | ctx-rh-superiorparietal                 | -3 | ± | 7  | -5 | ± | 14 | 5  | ± | 28  | 7   | ± | 32  | 38 | ± | 53 | 27  | -5  | ± | 19 | <0.001 |
| 2030 | ctx-rh-superiortemporal                 | -7 | ± | 8  | -4 | ± | 16 | 34 | ± | 67  | 61  | ± | 82  | 57 | ± | 71 | 57  | -8  | ± | 16 | <0.001 |
| 2031 | ctx-rh-supramarginal                    | -7 | ± | 7  | -6 | ± | 14 | 20 | ± | 53  | 32  | ± | 63  | 53 | ± | 72 | 73  | -9  | ± | 16 | 0.007  |
| 2033 | ctx-rh-temporalpole                     | -1 | ± | 8  | 1  | ± | 15 | 46 | ± | 52  | 92  | ± | 75  | 76 | ± | 63 | 63  | -5  | ± | 19 | 0.144  |
| 2034 | ctx-rh-transversetemporal               | -5 | ± | 8  | 1  | ± | 20 | 47 | ± | 74  | 76  | ± | 87  | 43 | ± | 54 | 40  | -9  | ± | 17 | 0.125  |
|      | <b><i>Some white matter regions</i></b> |    |   |    |    |   |    |    |   |     |     |   |     |    |   |    |     |     |   |    |        |
| 3002 | wm-lh-caudalanteriorcingulate           | -3 | ± | 10 | -6 | ± | 14 | 0  | ± | 24  | -3  | ± | 14  | 12 | ± | 22 | 32  | -7  | ± | 18 | 0.005  |
| 3003 | wm-lh-caudalmiddlefrontal               | -3 | ± | 9  | -6 | ± | 15 | -1 | ± | 25  | -7  | ± | 12  | 6  | ± | 21 | 16  | -7  | ± | 19 | 0.029  |
| 3005 | wm-lh-cuneus                            | 0  | ± | 9  | -5 | ± | 13 | -2 | ± | 20  | 0   | ± | 15  | 21 | ± | 31 | 42  | -6  | ± | 19 | 0.091  |
| 3006 | wm-lh-entorhinal                        | -2 | ± | 8  | -5 | ± | 14 | 2  | ± | 24  | 1   | ± | 17  | 27 | ± | 33 | 38  | -8  | ± | 19 | 0.016  |
| 3032 | wm-lh-frontalpole                       | -2 | ± | 10 | -6 | ± | 14 | -5 | ± | 19  | -2  | ± | 8   | 39 | ± | 39 | 51  | -4  | ± | 19 | <0.001 |

|      |                                |    |   |    |    |   |    |    |   |    |    |   |    |    |   |    |    |    |   |    |        |
|------|--------------------------------|----|---|----|----|---|----|----|---|----|----|---|----|----|---|----|----|----|---|----|--------|
| 3007 | wm-lh-fusiform                 | -1 | ± | 8  | -5 | ± | 14 | 0  | ± | 23 | -3 | ± | 17 | 11 | ± | 24 | 30 | -8 | ± | 18 | 0.016  |
| 3008 | wm-lh-inferiorparietal         | -2 | ± | 8  | -6 | ± | 14 | -2 | ± | 21 | -6 | ± | 12 | 7  | ± | 20 | 25 | -8 | ± | 19 | 0.025  |
| 3009 | wm-lh-inferiortemporal         | -3 | ± | 8  | -5 | ± | 14 | 1  | ± | 25 | -5 | ± | 15 | 10 | ± | 26 | 26 | -8 | ± | 18 | 0.008  |
| 3035 | wm-lh-insula                   | -2 | ± | 8  | -6 | ± | 14 | 1  | ± | 25 | -1 | ± | 17 | 13 | ± | 24 | 35 | -7 | ± | 18 | 0.038  |
| 3010 | wm-lh-isthmuscingulate         | -2 | ± | 9  | -5 | ± | 14 | 1  | ± | 23 | 0  | ± | 19 | 12 | ± | 23 | 36 | -8 | ± | 18 | 0.026  |
| 3011 | wm-lh-lateraloccipital         | 1  | ± | 7  | -3 | ± | 13 | -3 | ± | 20 | -4 | ± | 11 | 8  | ± | 17 | 24 | -6 | ± | 19 | 0.020  |
| 3012 | wm-lh-lateralorbitofrontal     | -2 | ± | 9  | -6 | ± | 14 | 0  | ± | 23 | 0  | ± | 15 | 21 | ± | 27 | 42 | -6 | ± | 19 | 0.004  |
| 3013 | wm-lh-lingual                  | 0  | ± | 8  | -4 | ± | 13 | 0  | ± | 21 | 0  | ± | 17 | 17 | ± | 27 | 34 | -7 | ± | 18 | 0.045  |
| 3014 | wm-lh-medialorbitofrontal      | -3 | ± | 8  | -6 | ± | 13 | 2  | ± | 22 | 6  | ± | 17 | 27 | ± | 31 | 46 | -6 | ± | 19 | 0.005  |
| 3015 | wm-lh-middletemporal           | -3 | ± | 9  | -6 | ± | 15 | 0  | ± | 26 | -6 | ± | 16 | 14 | ± | 30 | 37 | -8 | ± | 18 | 0.017  |
| 3017 | wm-lh-paracentral              | -3 | ± | 8  | -6 | ± | 14 | -1 | ± | 24 | -5 | ± | 13 | 11 | ± | 23 | 19 | -7 | ± | 19 | 0.023  |
| 3016 | wm-lh-parahippocampal          | -1 | ± | 10 | -4 | ± | 15 | 9  | ± | 29 | 14 | ± | 33 | 32 | ± | 36 | 34 | -8 | ± | 18 | 0.014  |
| 3018 | wm-lh-parsopercularis          | -3 | ± | 9  | -6 | ± | 15 | -1 | ± | 25 | -4 | ± | 14 | 17 | ± | 28 | 30 | -7 | ± | 19 | 0.012  |
| 3019 | wm-lh-parsorbitalis            | -2 | ± | 10 | -6 | ± | 15 | -1 | ± | 24 | -1 | ± | 15 | 31 | ± | 36 | 43 | -5 | ± | 20 | 0.006  |
| 3020 | wm-lh-parstriangularis         | -2 | ± | 10 | -6 | ± | 15 | -2 | ± | 23 | -4 | ± | 12 | 16 | ± | 25 | 34 | -6 | ± | 19 | 0.003  |
| 3021 | wm-lh-pericalcarine            | 0  | ± | 8  | -4 | ± | 13 | -1 | ± | 20 | 0  | ± | 15 | 17 | ± | 27 | 39 | -6 | ± | 18 | 0.025  |
| 3022 | wm-lh-postcentral              | -4 | ± | 8  | -7 | ± | 15 | 0  | ± | 25 | -4 | ± | 16 | 18 | ± | 34 | 26 | -8 | ± | 19 | 0.023  |
| 3023 | wm-lh-posteriorcingulate       | -2 | ± | 9  | -6 | ± | 14 | 1  | ± | 25 | -3 | ± | 15 | 11 | ± | 21 | 28 | -8 | ± | 18 | 0.006  |
| 3024 | wm-lh-precentral               | -4 | ± | 8  | -7 | ± | 14 | -1 | ± | 25 | -6 | ± | 13 | 10 | ± | 24 | 19 | -8 | ± | 19 | 0.030  |
| 3025 | wm-lh-precuneus                | -1 | ± | 8  | -5 | ± | 13 | -1 | ± | 22 | -3 | ± | 14 | 12 | ± | 23 | 37 | -7 | ± | 19 | 0.035  |
| 3026 | wm-lh-rostralanteriorcingulate | -3 | ± | 10 | -6 | ± | 14 | 0  | ± | 23 | 0  | ± | 16 | 17 | ± | 25 | 39 | -7 | ± | 19 | 0.004  |
| 3027 | wm-lh-rostralmiddlefrontal     | -2 | ± | 9  | -6 | ± | 14 | -2 | ± | 22 | -6 | ± | 11 | 10 | ± | 20 | 22 | -5 | ± | 20 | 0.005  |
| 3028 | wm-lh-superiorfrontal          | -3 | ± | 9  | -6 | ± | 14 | -2 | ± | 23 | -5 | ± | 12 | 12 | ± | 23 | 25 | -6 | ± | 19 | 0.002  |
| 3029 | wm-lh-superiorparietal         | -2 | ± | 9  | -6 | ± | 14 | -2 | ± | 22 | -5 | ± | 11 | 9  | ± | 23 | 23 | -7 | ± | 19 | 0.049  |
| 3030 | wm-lh-superiortemporal         | -3 | ± | 9  | -6 | ± | 15 | 1  | ± | 25 | -2 | ± | 18 | 18 | ± | 31 | 41 | -8 | ± | 19 | 0.026  |
| 3031 | wm-lh-supramarginal            | -3 | ± | 8  | -6 | ± | 14 | 0  | ± | 25 | -5 | ± | 14 | 14 | ± | 28 | 32 | -8 | ± | 19 | 0.037  |
| 3033 | wm-lh-temporalpole             | -2 | ± | 8  | -5 | ± | 14 | 2  | ± | 23 | 6  | ± | 20 | 43 | ± | 45 | 53 | -7 | ± | 19 | 0.031  |
| 3034 | wm-lh-transversetemporal       | -3 | ± | 9  | -6 | ± | 15 | 4  | ± | 28 | 6  | ± | 27 | 23 | ± | 34 | 37 | -8 | ± | 19 | 0.077  |
| 4001 | wm-rh-bankssts                 | -4 | ± | 9  | -6 | ± | 14 | -1 | ± | 25 | -7 | ± | 14 | 6  | ± | 23 | 17 | -9 | ± | 18 | 0.026  |
| 4002 | wm-rh-caudalanteriorcingulate  | -3 | ± | 9  | -6 | ± | 14 | 0  | ± | 24 | -2 | ± | 15 | 13 | ± | 21 | 33 | -8 | ± | 18 | 0.003  |
| 4003 | wm-rh-caudalmiddlefrontal      | -4 | ± | 8  | -6 | ± | 14 | -1 | ± | 24 | -6 | ± | 13 | 6  | ± | 23 | 21 | -8 | ± | 18 | 0.046  |
| 4005 | wm-rh-cuneus                   | 0  | ± | 9  | -5 | ± | 13 | -2 | ± | 20 | -1 | ± | 14 | 21 | ± | 33 | 40 | -6 | ± | 19 | 0.108  |
| 4006 | wm-rh-entorhinal               | -3 | ± | 8  | -6 | ± | 13 | 2  | ± | 26 | 2  | ± | 19 | 27 | ± | 34 | 36 | -9 | ± | 17 | 0.003  |
| 4032 | wm-rh-frontalpole              | -3 | ± | 8  | -7 | ± | 13 | -5 | ± | 17 | -3 | ± | 9  | 35 | ± | 32 | 61 | -4 | ± | 20 | <0.001 |
| 4007 | wm-rh-fusiform                 | -3 | ± | 8  | -6 | ± | 14 | 0  | ± | 25 | -2 | ± | 18 | 11 | ± | 25 | 25 | -9 | ± | 17 | 0.025  |
| 4008 | wm-rh-inferiorparietal         | -2 | ± | 9  | -7 | ± | 14 | -2 | ± | 23 | -6 | ± | 13 | 6  | ± | 21 | 13 | -8 | ± | 18 | 0.031  |
| 4009 | wm-rh-inferiortemporal         | -4 | ± | 8  | -7 | ± | 14 | -1 | ± | 26 | -6 | ± | 16 | 8  | ± | 25 | 19 | -9 | ± | 18 | 0.004  |
| 4035 | wm-rh-insula                   | -4 | ± | 8  | -7 | ± | 14 | 1  | ± | 26 | -2 | ± | 17 | 11 | ± | 24 | 30 | -8 | ± | 18 | 0.024  |

|                                            |                                             |    |   |    |    |   |    |    |   |    |    |   |    |    |   |    |    |     |   |    |        |
|--------------------------------------------|---------------------------------------------|----|---|----|----|---|----|----|---|----|----|---|----|----|---|----|----|-----|---|----|--------|
| 4010                                       | wm-rh-isthmuscingulate                      | -2 | ± | 9  | -5 | ± | 14 | 2  | ± | 24 | 1  | ± | 21 | 14 | ± | 24 | 31 | -7  | ± | 18 | 0.020  |
| 4011                                       | wm-rh-lateraloccipital                      | 0  | ± | 7  | -5 | ± | 13 | -4 | ± | 21 | -5 | ± | 11 | 6  | ± | 18 | 15 | -7  | ± | 18 | 0.019  |
| 4012                                       | wm-rh-lateralorbitofrontal                  | -5 | ± | 8  | -7 | ± | 14 | 0  | ± | 23 | 0  | ± | 15 | 19 | ± | 25 | 43 | -8  | ± | 18 | 0.001  |
| 4013                                       | wm-rh-lingual                               | 0  | ± | 8  | -4 | ± | 13 | 1  | ± | 21 | 3  | ± | 21 | 19 | ± | 32 | 35 | -7  | ± | 18 | 0.108  |
| 4014                                       | wm-rh-medialorbitofrontal                   | -4 | ± | 8  | -7 | ± | 13 | 1  | ± | 22 | 5  | ± | 16 | 26 | ± | 30 | 48 | -7  | ± | 18 | 0.006  |
| 4015                                       | wm-rh-middletemporal                        | -5 | ± | 9  | -7 | ± | 14 | -1 | ± | 27 | -7 | ± | 16 | 11 | ± | 30 | 19 | -9  | ± | 18 | 0.002  |
| 4017                                       | wm-rh-paracentral                           | -3 | ± | 8  | -7 | ± | 14 | -1 | ± | 23 | -6 | ± | 13 | 8  | ± | 20 | 17 | -7  | ± | 18 | 0.005  |
| 4016                                       | wm-rh-parahippocampal                       | -3 | ± | 9  | -5 | ± | 15 | 11 | ± | 31 | 15 | ± | 37 | 30 | ± | 37 | 26 | -9  | ± | 18 | 0.022  |
| 4018                                       | wm-rh-parsopercularis                       | -5 | ± | 8  | -7 | ± | 14 | 0  | ± | 25 | -5 | ± | 16 | 12 | ± | 27 | 34 | -9  | ± | 18 | 0.007  |
| 4019                                       | wm-rh-parsorbitalis                         | -4 | ± | 7  | -8 | ± | 13 | 0  | ± | 23 | -1 | ± | 15 | 26 | ± | 32 | 44 | -7  | ± | 18 | 0.003  |
| 4020                                       | wm-rh-parstriangularis                      | -5 | ± | 7  | -8 | ± | 14 | 0  | ± | 24 | -4 | ± | 14 | 15 | ± | 27 | 37 | -8  | ± | 18 | 0.004  |
| 4021                                       | wm-rh-pericalcarine                         | -1 | ± | 8  | -5 | ± | 13 | -2 | ± | 20 | -1 | ± | 15 | 16 | ± | 26 | 40 | -7  | ± | 18 | 0.045  |
| 4022                                       | wm-rh-postcentral                           | -5 | ± | 8  | -7 | ± | 14 | 1  | ± | 26 | -2 | ± | 19 | 18 | ± | 35 | 27 | -8  | ± | 18 | 0.014  |
| 4023                                       | wm-rh-posteriorcingulate                    | -3 | ± | 9  | -6 | ± | 14 | 1  | ± | 24 | -3 | ± | 15 | 11 | ± | 22 | 27 | -8  | ± | 18 | 0.003  |
| 4024                                       | wm-rh-precentral                            | -4 | ± | 8  | -7 | ± | 14 | 0  | ± | 25 | -6 | ± | 14 | 9  | ± | 25 | 19 | -8  | ± | 18 | 0.017  |
| 4025                                       | wm-rh-precuneus                             | -2 | ± | 9  | -6 | ± | 14 | -1 | ± | 22 | -3 | ± | 13 | 13 | ± | 24 | 33 | -7  | ± | 18 | 0.019  |
| 4026                                       | wm-rh-rostralanteriorcingulate              | -4 | ± | 9  | -7 | ± | 13 | -1 | ± | 23 | 0  | ± | 16 | 16 | ± | 21 | 44 | -7  | ± | 18 | 0.001  |
| 4027                                       | wm-rh-rostralmiddlefrontal                  | -4 | ± | 8  | -6 | ± | 14 | -2 | ± | 22 | -6 | ± | 11 | 9  | ± | 20 | 32 | -6  | ± | 19 | 0.002  |
| 4028                                       | wm-rh-superiorfrontal                       | -4 | ± | 9  | -6 | ± | 14 | -3 | ± | 22 | -5 | ± | 12 | 10 | ± | 22 | 29 | -7  | ± | 18 | 0.008  |
| 4029                                       | wm-rh-superiorparietal                      | -2 | ± | 9  | -6 | ± | 14 | -1 | ± | 22 | -5 | ± | 11 | 9  | ± | 23 | 16 | -7  | ± | 18 | 0.037  |
| 4030                                       | wm-rh-superiortemporal                      | -5 | ± | 9  | -7 | ± | 14 | 1  | ± | 27 | -1 | ± | 20 | 20 | ± | 35 | 28 | -9  | ± | 18 | 0.004  |
| 4031                                       | wm-rh-supramarginal                         | -4 | ± | 9  | -7 | ± | 14 | 0  | ± | 26 | -5 | ± | 16 | 13 | ± | 29 | 25 | -8  | ± | 18 | 0.011  |
| 4033                                       | wm-rh-temporalpole                          | -4 | ± | 8  | -7 | ± | 13 | 3  | ± | 26 | 4  | ± | 17 | 38 | ± | 38 | 49 | -8  | ± | 19 | <0.001 |
| 4034                                       | wm-rh-transversetemporal                    | -4 | ± | 10 | -7 | ± | 15 | 4  | ± | 31 | 6  | ± | 27 | 22 | ± | 36 | 26 | -9  | ± | 18 | 0.022  |
| <b><i>Other selected brain regions</i></b> |                                             |    |   |    |    |   |    |    |   |    |    |   |    |    |   |    |    |     |   |    |        |
| 85                                         | Optic-Chiasm                                | -1 | ± | 14 | 22 | ± | 34 | 85 | ± | 79 | 90 | ± | 79 | 33 | ± | 40 | 39 | -15 | ± | 19 | <0.001 |
| 16                                         | Brain-Stem                                  | 0  | ± | 8  | -2 | ± | 14 | 11 | ± | 27 | 12 | ± | 26 | 17 | ± | 23 | 28 | -8  | ± | 18 | 0.009  |
| 255                                        | CC_Anterior                                 | -2 | ± | 9  | -5 | ± | 14 | 6  | ± | 26 | 7  | ± | 21 | 13 | ± | 22 | 33 | -7  | ± | 18 | 0.002  |
| 253                                        | CC_Central                                  | -2 | ± | 9  | -5 | ± | 15 | 9  | ± | 30 | 9  | ± | 32 | 12 | ± | 21 | 26 | -9  | ± | 17 | 0.001  |
| 254                                        | CC_Mid_Anterior                             | -2 | ± | 9  | -5 | ± | 15 | 6  | ± | 27 | 6  | ± | 25 | 11 | ± | 22 | 29 | -8  | ± | 18 | 0.002  |
| 252                                        | CC_Mid_Posterior                            | -2 | ± | 10 | -1 | ± | 21 | 24 | ± | 46 | 27 | ± | 54 | 15 | ± | 25 | 43 | -9  | ± | 18 | 0.002  |
| 251                                        | CC_Posterior                                | -1 | ± | 10 | -5 | ± | 14 | 6  | ± | 25 | 8  | ± | 24 | 17 | ± | 25 | 35 | -8  | ± | 19 | 0.002  |
| 13, 52                                     | Left-Pallidum, Right-Pallidum               | -2 | ± | 8  | -6 | ± | 14 | 0  | ± | 25 | -6 | ± | 13 | 2  | ± | 17 | 16 | -8  | ± | 18 | 0.017  |
| 12, 51                                     | Left-Putamen, Right-Putamen                 | -4 | ± | 8  | -6 | ± | 14 | 0  | ± | 25 | -6 | ± | 13 | 7  | ± | 19 | 34 | -8  | ± | 17 | 0.007  |
| 10, 49                                     | Left-Thalamus-Proper, Right-Thalamus-Proper | -2 | ± | 8  | -4 | ± | 15 | 5  | ± | 26 | 2  | ± | 18 | 11 | ± | 21 | 24 | -8  | ± | 18 | 0.008  |
| 11, 50                                     | Left-Caudate, Right-Caudate                 | -4 | ± | 8  | -6 | ± | 14 | 2  | ± | 27 | -1 | ± | 19 | 5  | ± | 19 | 46 | -8  | ± | 17 | 0.005  |

|                    |                                                    |           |            |            |            |           |     |          |        |
|--------------------|----------------------------------------------------|-----------|------------|------------|------------|-----------|-----|----------|--------|
| 26, 58             | Left-Accumbens-area,<br>Right-Accumbens-area       | -4 ± 8    | -6 ± 14    | 5 ± 26     | 11 ± 22    | 31 ± 31   | 44  | -8 ± 17  | <0.001 |
| 18, 54             | Left-Amygdala, Right-<br>Amygdala                  | -3 ± 7    | -3 ± 14    | 14 ± 28    | 21 ± 28    | 37 ± 37   | 34  | -8 ± 17  | 0.004  |
| 17, 53             | Left-Hippocampus,<br>Right-Hippocampus             | -1 ± 7    | 2 ± 17     | 35 ± 45    | 48 ± 55    | 39 ± 39   | 31  | -8 ± 17  | 0.005  |
| <b>CSF regions</b> |                                                    |           |            |            |            |           |     |          |        |
| 24                 | CSF                                                | 16 ± 20   | 101 ± 116  | 354 ± 309  | 500 ± 421  | 157 ± 164 | 177 | -8 ± 17  | <0.001 |
| 14                 | 3rd-Ventricle                                      | 5 ± 13    | 332 ± 823  | 493 ± 915  | 467 ± 898  | 146 ± 221 | 183 | -10 ± 16 | 0.011  |
| 15                 | 4th-Ventricle                                      | 359 ± 457 | 883 ± 1347 | 105 ± 1285 | 936 ± 1167 | 266 ± 295 | 215 | -5 ± 24  | 0.009  |
| 5, 44              | Left-Inf-Lat-Vent,<br>Right-Inf-Lat-Vent           | -3 ± 6    | 39 ± 122   | 74 ± 159   | 66 ± 168   | 26 ± 54   | 13  | -14 ± 17 | <0.001 |
| 4, 43              | Left-Lateral-Ventricle,<br>Right-Lateral-Ventricle | -10 ± 8   | 342 ± 957  | 641 ± 1415 | 656 ± 1438 | 173 ± 325 | 228 | -10 ± 12 | 0.052  |

Data presented as mean ± standard deviation. \*Sign.: Significant differences over time was determined by a linear mixed model for repeated measurements. SegID – FreeSurfer segmentation identity; Ctx - Cortex; lh – left hemisphere; rh – right hemisphere; wm – white matter; CC – corpus callosum; CSF – cerebrospinal fluid.

**Table S3.** Percentage change in normalized T1 signals at various time points after intrathecal gadobutrol in iNPH individuals

| SegID                                    | StructName                      | Time after intrathecal gadobutrol |   |    |       |   |    |       |   |    |       |   |    |      |   |    |      |   |    | *Sign |         |    |        |
|------------------------------------------|---------------------------------|-----------------------------------|---|----|-------|---|----|-------|---|----|-------|---|----|------|---|----|------|---|----|-------|---------|----|--------|
|                                          |                                 | 1.5 - 2 h                         |   |    | 2-4 h |   |    | 4-6 h |   |    | 6-9 h |   |    | 24 h |   |    | 48 h |   |    |       | 4 weeks |    |        |
| <i>Some cortical grey matter regions</i> |                                 |                                   |   |    |       |   |    |       |   |    |       |   |    |      |   |    |      |   |    |       |         |    |        |
| 1002                                     | ctx-lh-caudalanteriorcingulate  | 2                                 | ± | 20 | 1     | ± | 15 | 20    | ± | 23 | 66    | ± | 63 | 127  | ± | 56 | 68   | ± | 65 | 5     | ±       | 18 | <0.001 |
| 1003                                     | ctx-lh-caudalmiddlefrontal      | 3                                 | ± | 25 | -1    | ± | 16 | 0     | ± | 22 | -6    | ± | 16 | 39   | ± | 53 | 64   | ± | 30 | 2     | ±       | 19 | <0.001 |
| 1005                                     | ctx-lh-cuneus                   | 2                                 | ± | 12 | 1     | ± | 9  | 5     | ± | 16 | 8     | ± | 18 | 67   | ± | 45 | 69   | ± | 63 | 7     | ±       | 14 | <0.001 |
| 1006                                     | ctx-lh-entorhinal               | 4                                 | ± | 27 | 8     | ± | 18 | 73    | ± | 51 | 103   | ± | 71 | 112  | ± | 55 | 64   | ± | 65 | 5     | ±       | 21 | <0.001 |
| 1032                                     | ctx-lh-frontalpole              | -1                                | ± | 16 | -2    | ± | 11 | -1    | ± | 15 | 11    | ± | 27 | 136  | ± | 67 | 95   | ± | 76 | 4     | ±       | 14 | <0.001 |
| 1007                                     | ctx-lh-fusiform                 | 3                                 | ± | 26 | 2     | ± | 18 | 14    | ± | 24 | 28    | ± | 37 | 78   | ± | 43 | 63   | ± | 55 | 6     | ±       | 19 | <0.001 |
| 1008                                     | ctx-lh-inferiorparietal         | 3                                 | ± | 26 | 1     | ± | 17 | 4     | ± | 23 | -4    | ± | 15 | 28   | ± | 43 | 51   | ± | 19 | 6     | ±       | 17 | <0.001 |
| 1009                                     | ctx-lh-inferiortemporal         | 3                                 | ± | 32 | -1    | ± | 21 | 3     | ± | 28 | -2    | ± | 19 | 42   | ± | 42 | 62   | ± | 39 | 6     | ±       | 21 | <0.001 |
| 1035                                     | ctx-lh-insula                   | 2                                 | ± | 27 | 6     | ± | 19 | 61    | ± | 50 | 92    | ± | 63 | 120  | ± | 55 | 70   | ± | 68 | 6     | ±       | 20 | <0.001 |
| 1010                                     | ctx-lh-isthmuscingulate         | 4                                 | ± | 19 | 6     | ± | 11 | 28    | ± | 25 | 54    | ± | 38 | 100  | ± | 43 | 65   | ± | 65 | 7     | ±       | 17 | <0.001 |
| 1011                                     | ctx-lh-lateraloccipital         | 3                                 | ± | 17 | 1     | ± | 13 | 5     | ± | 18 | 1     | ± | 14 | 20   | ± | 26 | 48   | ± | 23 | 9     | ±       | 13 | <0.001 |
| 1012                                     | ctx-lh-lateralorbitofrontal     | 2                                 | ± | 23 | 4     | ± | 13 | 34    | ± | 23 | 66    | ± | 49 | 117  | ± | 55 | 70   | ± | 67 | 4     | ±       | 15 | <0.001 |
| 1013                                     | ctx-lh-lingual                  | 4                                 | ± | 19 | 4     | ± | 13 | 17    | ± | 21 | 38    | ± | 40 | 93   | ± | 47 | 69   | ± | 67 | 8     | ±       | 15 | <0.001 |
| 1014                                     | ctx-lh-medialorbitofrontal      | 2                                 | ± | 16 | 9     | ± | 14 | 79    | ± | 56 | 133   | ± | 83 | 141  | ± | 59 | 81   | ± | 77 | 5     | ±       | 16 | <0.001 |
| 1015                                     | ctx-lh-middletemporal           | 5                                 | ± | 34 | 0     | ± | 23 | 3     | ± | 29 | -4    | ± | 20 | 57   | ± | 58 | 69   | ± | 48 | 7     | ±       | 22 | <0.001 |
| 1017                                     | ctx-lh-paracentral              | 3                                 | ± | 19 | 1     | ± | 13 | 4     | ± | 21 | 5     | ± | 19 | 51   | ± | 48 | 49   | ± | 35 | 3     | ±       | 18 | <0.001 |
| 1016                                     | ctx-lh-parahippocampal          | 6                                 | ± | 26 | 17    | ± | 23 | 92    | ± | 79 | 119   | ± | 74 | 112  | ± | 52 | 62   | ± | 65 | 6     | ±       | 18 | <0.001 |
| 1018                                     | ctx-lh-parsopercularis          | 3                                 | ± | 27 | -1    | ± | 18 | 10    | ± | 28 | 22    | ± | 29 | 105  | ± | 58 | 66   | ± | 55 | 3     | ±       | 19 | <0.001 |
| 1019                                     | ctx-lh-parsorbitalis            | -2                                | ± | 24 | -3    | ± | 14 | 6     | ± | 28 | 14    | ± | 23 | 111  | ± | 58 | 76   | ± | 64 | 4     | ±       | 17 | <0.001 |
| 1020                                     | ctx-lh-parstriangularis         | 0                                 | ± | 26 | -3    | ± | 16 | 8     | ± | 28 | 22    | ± | 30 | 110  | ± | 57 | 77   | ± | 69 | 3     | ±       | 18 | <0.001 |
| 1021                                     | ctx-lh-pericalcarine            | 2                                 | ± | 12 | 3     | ± | 9  | 11    | ± | 15 | 21    | ± | 21 | 86   | ± | 44 | 77   | ± | 67 | 9     | ±       | 14 | <0.001 |
| 1022                                     | ctx-lh-postcentral              | 4                                 | ± | 27 | 0     | ± | 19 | 6     | ± | 27 | 7     | ± | 22 | 81   | ± | 56 | 71   | ± | 53 | 4     | ±       | 20 | <0.001 |
| 1023                                     | ctx-lh-posteriorcingulate       | 4                                 | ± | 21 | 2     | ± | 15 | 7     | ± | 24 | 25    | ± | 41 | 87   | ± | 55 | 60   | ± | 54 | 3     | ±       | 18 | <0.001 |
| 1024                                     | ctx-lh-precentral               | 5                                 | ± | 27 | 0     | ± | 18 | 5     | ± | 26 | 4     | ± | 22 | 64   | ± | 54 | 61   | ± | 38 | 2     | ±       | 20 | <0.001 |
| 1025                                     | ctx-lh-precuneus                | 4                                 | ± | 17 | 2     | ± | 12 | 5     | ± | 20 | 6     | ± | 19 | 61   | ± | 48 | 55   | ± | 44 | 6     | ±       | 16 | <0.001 |
| 1026                                     | ctx-lh-rostralanteriorcingulate | 1                                 | ± | 18 | 7     | ± | 12 | 79    | ± | 54 | 141   | ± | 92 | 143  | ± | 61 | 73   | ± | 71 | 6     | ±       | 17 | <0.001 |
| 1027                                     | ctx-lh-rostralmiddlefrontal     | -1                                | ± | 22 | -3    | ± | 14 | -2    | ± | 22 | -6    | ± | 16 | 59   | ± | 52 | 86   | ± | 57 | 2     | ±       | 17 | <0.001 |
| 1028                                     | ctx-lh-superiorfrontal          | 3                                 | ± | 18 | 0     | ± | 13 | 2     | ± | 19 | 2     | ± | 17 | 67   | ± | 41 | 71   | ± | 42 | 3     | ±       | 17 | <0.001 |
| 1029                                     | ctx-lh-superiorparietal         | 4                                 | ± | 18 | 2     | ± | 13 | 3     | ± | 21 | -2    | ± | 16 | 34   | ± | 48 | 50   | ± | 12 | 7     | ±       | 18 | <0.001 |
| 1030                                     | ctx-lh-superiortemporal         | 5                                 | ± | 32 | 1     | ± | 22 | 19    | ± | 28 | 40    | ± | 35 | 109  | ± | 57 | 71   | ± | 64 | 6     | ±       | 22 | <0.001 |
| 1031                                     | ctx-lh-supramarginal            | 5                                 | ± | 32 | 0     | ± | 21 | 6     | ± | 26 | 6     | ± | 22 | 93   | ± | 57 | 78   | ± | 59 | 5     | ±       | 21 | <0.001 |
| 1033                                     | ctx-lh-temporalpole             | 4                                 | ± | 30 | 6     | ± | 19 | 46    | ± | 42 | 87    | ± | 62 | 130  | ± | 68 | 72   | ± | 75 | 8     | ±       | 21 | <0.001 |
| 1034                                     | ctx-lh-transversetemporal       | 5                                 | ± | 28 | 4     | ± | 21 | 40    | ± | 38 | 76    | ± | 57 | 94   | ± | 48 | 55   | ± | 56 | 6     | ±       | 20 | <0.001 |
| 2002                                     | ctx-rh-caudalanteriorcingulate  | 3                                 | ± | 20 | 1     | ± | 14 | 22    | ± | 27 | 62    | ± | 49 | 137  | ± | 55 | 64   | ± | 60 | 4     | ±       | 16 | <0.001 |



|                                  |                                 |    |   |    |    |   |    |    |   |    |     |   |    |     |   |    |     |   |    |   |   |    |        |
|----------------------------------|---------------------------------|----|---|----|----|---|----|----|---|----|-----|---|----|-----|---|----|-----|---|----|---|---|----|--------|
| 2003                             | ctx-rh-caudalmiddlefrontal      | 5  | ± | 20 | 1  | ± | 15 | -1 | ± | 21 | -8  | ± | 16 | 43  | ± | 55 | 59  | ± | 36 | 2 | ± | 19 | <0.001 |
| 2005                             | ctx-rh-cuneus                   | 2  | ± | 9  | 2  | ± | 7  | 6  | ± | 16 | 10  | ± | 20 | 80  | ± | 54 | 72  | ± | 72 | 7 | ± | 14 | <0.001 |
| 2006                             | ctx-rh-entorhinal               | 7  | ± | 19 | 10 | ± | 15 | 63 | ± | 47 | 99  | ± | 68 | 121 | ± | 50 | 62  | ± | 71 | 4 | ± | 15 | <0.001 |
| 2032                             | ctx-rh-frontalpole              | 1  | ± | 10 | 0  | ± | 7  | 0  | ± | 15 | 9   | ± | 19 | 141 | ± | 68 | 102 | ± | 92 | 4 | ± | 15 | <0.001 |
| 2007                             | ctx-rh-fusiform                 | 7  | ± | 18 | 4  | ± | 14 | 13 | ± | 25 | 29  | ± | 38 | 87  | ± | 43 | 63  | ± | 66 | 6 | ± | 18 | <0.001 |
| 2008                             | ctx-rh-inferiorparietal         | 9  | ± | 19 | 5  | ± | 13 | 4  | ± | 24 | -1  | ± | 17 | 32  | ± | 48 | 37  | ± | 7  | 5 | ± | 18 | <0.001 |
| 2009                             | ctx-rh-inferiortemporal         | 9  | ± | 23 | 3  | ± | 19 | 5  | ± | 27 | 1   | ± | 18 | 49  | ± | 39 | 57  | ± | 48 | 8 | ± | 20 | <0.001 |
| 2035                             | ctx-rh-insula                   | 4  | ± | 22 | 8  | ± | 17 | 62 | ± | 54 | 109 | ± | 78 | 135 | ± | 58 | 70  | ± | 75 | 8 | ± | 20 | <0.001 |
| 2010                             | ctx-rh-isthmuscingulate         | 4  | ± | 16 | 7  | ± | 11 | 33 | ± | 25 | 58  | ± | 43 | 107 | ± | 45 | 62  | ± | 68 | 5 | ± | 16 | <0.001 |
| 2011                             | ctx-rh-lateraloccipital         | 5  | ± | 11 | 2  | ± | 8  | 3  | ± | 14 | 2   | ± | 13 | 20  | ± | 23 | 36  | ± | 25 | 8 | ± | 15 | <0.001 |
| 2012                             | ctx-rh-lateralorbitofrontal     | 4  | ± | 19 | 5  | ± | 13 | 42 | ± | 38 | 84  | ± | 63 | 134 | ± | 56 | 75  | ± | 79 | 5 | ± | 15 | <0.001 |
| 2013                             | ctx-rh-lingual                  | 6  | ± | 14 | 6  | ± | 11 | 19 | ± | 23 | 40  | ± | 48 | 101 | ± | 46 | 68  | ± | 70 | 7 | ± | 15 | <0.001 |
| 2014                             | ctx-rh-medialorbitofrontal      | 3  | ± | 15 | 9  | ± | 12 | 80 | ± | 59 | 132 | ± | 83 | 151 | ± | 59 | 74  | ± | 71 | 4 | ± | 14 | <0.001 |
| 2015                             | ctx-rh-middletemporal           | 9  | ± | 25 | 2  | ± | 19 | 5  | ± | 29 | 0   | ± | 25 | 67  | ± | 61 | 62  | ± | 49 | 7 | ± | 20 | <0.001 |
| 2017                             | ctx-rh-paracentral              | 3  | ± | 18 | 1  | ± | 12 | 3  | ± | 21 | 6   | ± | 20 | 63  | ± | 50 | 55  | ± | 44 | 1 | ± | 16 | <0.001 |
| 2016                             | ctx-rh-parahippocampal          | 13 | ± | 22 | 21 | ± | 26 | 94 | ± | 88 | 124 | ± | 75 | 125 | ± | 49 | 61  | ± | 73 | 7 | ± | 18 | <0.001 |
| 2018                             | ctx-rh-parsopercularis          | 6  | ± | 22 | 2  | ± | 17 | 17 | ± | 33 | 33  | ± | 39 | 120 | ± | 58 | 68  | ± | 68 | 5 | ± | 19 | <0.001 |
| 2019                             | ctx-rh-parsorbitalis            | 5  | ± | 17 | 1  | ± | 14 | 7  | ± | 25 | 16  | ± | 25 | 135 | ± | 60 | 79  | ± | 83 | 4 | ± | 16 | <0.001 |
| 2020                             | ctx-rh-parstriangularis         | 5  | ± | 20 | 0  | ± | 16 | 10 | ± | 31 | 18  | ± | 33 | 123 | ± | 56 | 75  | ± | 80 | 4 | ± | 18 | <0.001 |
| 2021                             | ctx-rh-pericalcarine            | 3  | ± | 10 | 3  | ± | 9  | 11 | ± | 18 | 19  | ± | 22 | 89  | ± | 53 | 71  | ± | 66 | 8 | ± | 13 | <0.001 |
| 2022                             | ctx-rh-postcentral              | 7  | ± | 21 | 2  | ± | 16 | 6  | ± | 27 | 8   | ± | 24 | 88  | ± | 55 | 70  | ± | 52 | 4 | ± | 20 | <0.001 |
| 2023                             | ctx-rh-posteriorcingulate       | 5  | ± | 21 | 2  | ± | 15 | 7  | ± | 22 | 24  | ± | 34 | 96  | ± | 54 | 62  | ± | 57 | 3 | ± | 18 | <0.001 |
| 2024                             | ctx-rh-precentral               | 6  | ± | 22 | 2  | ± | 16 | 5  | ± | 25 | 2   | ± | 20 | 64  | ± | 50 | 60  | ± | 43 | 2 | ± | 19 | <0.001 |
| 2025                             | ctx-rh-precuneus                | 3  | ± | 15 | 3  | ± | 10 | 6  | ± | 19 | 7   | ± | 20 | 74  | ± | 53 | 64  | ± | 57 | 5 | ± | 16 | <0.001 |
| 2026                             | ctx-rh-rostralanteriorcingulate | 2  | ± | 16 | 5  | ± | 12 | 76 | ± | 56 | 128 | ± | 72 | 149 | ± | 55 | 68  | ± | 66 | 5 | ± | 13 | <0.001 |
| 2027                             | ctx-rh-rostralmiddlefrontal     | 2  | ± | 17 | -1 | ± | 13 | -2 | ± | 21 | -8  | ± | 17 | 74  | ± | 55 | 85  | ± | 73 | 3 | ± | 16 | <0.001 |
| 2028                             | ctx-rh-superiorfrontal          | 2  | ± | 17 | -1 | ± | 12 | 1  | ± | 19 | 3   | ± | 17 | 80  | ± | 46 | 75  | ± | 50 | 2 | ± | 16 | <0.001 |
| 2029                             | ctx-rh-superiorparietal         | 5  | ± | 14 | 4  | ± | 9  | 3  | ± | 19 | -1  | ± | 15 | 28  | ± | 42 | 41  | ± | 5  | 4 | ± | 14 | <0.001 |
| 2030                             | ctx-rh-superiortemporal         | 8  | ± | 24 | 4  | ± | 19 | 21 | ± | 33 | 34  | ± | 32 | 122 | ± | 56 | 71  | ± | 67 | 7 | ± | 20 | <0.001 |
| 2031                             | ctx-rh-supramarginal            | 8  | ± | 23 | 3  | ± | 17 | 9  | ± | 28 | 11  | ± | 30 | 102 | ± | 56 | 76  | ± | 66 | 5 | ± | 20 | <0.001 |
| 2033                             | ctx-rh-temporalpole             | 3  | ± | 17 | 7  | ± | 15 | 46 | ± | 43 | 88  | ± | 60 | 144 | ± | 57 | 82  | ± | 79 | 2 | ± | 18 | <0.001 |
| 2034                             | ctx-rh-transversetemporal       | 9  | ± | 22 | 5  | ± | 17 | 54 | ± | 55 | 77  | ± | 54 | 105 | ± | 48 | 57  | ± | 58 | 7 | ± | 21 | <0.001 |
| <i>Some white matter regions</i> |                                 |    |   |    |    |   |    |    |   |    |     |   |    |     |   |    |     |   |    |   |   |    |        |
| 3002                             | wm-lh-caudalanteriorcingulate   | 2  | ± | 19 | -1 | ± | 14 | 5  | ± | 19 | 6   | ± | 19 | 41  | ± | 29 | 26  | ± | 27 | 1 | ± | 15 | <0.001 |
| 3003                             | wm-lh-caudalmiddlefrontal       | 3  | ± | 21 | -1 | ± | 15 | -1 | ± | 20 | -7  | ± | 14 | 7   | ± | 21 | 18  | ± | 6  | 1 | ± | 17 | <0.001 |
| 3005                             | wm-lh-cuneus                    | 3  | ± | 14 | 0  | ± | 10 | 1  | ± | 16 | -1  | ± | 13 | 26  | ± | 23 | 30  | ± | 24 | 4 | ± | 13 | <0.001 |
| 3006                             | wm-lh-entorhinal                | 2  | ± | 23 | -1 | ± | 16 | 5  | ± | 20 | 9   | ± | 22 | 54  | ± | 34 | 35  | ± | 32 | 2 | ± | 18 | <0.001 |
| 3032                             | wm-lh-frontalpole               | -1 | ± | 16 | -3 | ± | 12 | -5 | ± | 15 | -4  | ± | 14 | 56  | ± | 36 | 44  | ± | 28 | 2 | ± | 13 | <0.001 |
| 3007                             | wm-lh-fusiform                  | 2  | ± | 22 | -1 | ± | 16 | 4  | ± | 20 | 1   | ± | 16 | 31  | ± | 26 | 28  | ± | 22 | 3 | ± | 16 | <0.001 |
| 3008                             | wm-lh-inferiorparietal          | 3  | ± | 21 | 1  | ± | 15 | 4  | ± | 20 | -2  | ± | 14 | 11  | ± | 19 | 26  | ± | 17 | 4 | ± | 15 | <0.001 |

|      |                                |    |   |    |    |   |    |    |   |    |    |   |    |    |   |    |    |   |    |   |   |    |        |
|------|--------------------------------|----|---|----|----|---|----|----|---|----|----|---|----|----|---|----|----|---|----|---|---|----|--------|
| 3009 | wm-lh-inferiortemporal         | 1  | ± | 25 | -2 | ± | 18 | 1  | ± | 24 | -6 | ± | 16 | 13 | ± | 22 | 28 | ± | 17 | 2 | ± | 17 | <0.001 |
| 3035 | wm-lh-insula                   | 2  | ± | 23 | -1 | ± | 16 | 1  | ± | 20 | -1 | ± | 16 | 32 | ± | 27 | 27 | ± | 25 | 1 | ± | 17 | <0.001 |
| 3010 | wm-lh-isthmuscingulate         | 2  | ± | 18 | 1  | ± | 13 | 9  | ± | 20 | 11 | ± | 19 | 38 | ± | 27 | 25 | ± | 27 | 4 | ± | 16 | <0.001 |
| 3011 | wm-lh-lateraloccipital         | 3  | ± | 16 | 0  | ± | 12 | 4  | ± | 16 | -1 | ± | 13 | 11 | ± | 17 | 26 | ± | 16 | 6 | ± | 13 | <0.001 |
| 3012 | wm-lh-lateralorbitofrontal     | 2  | ± | 19 | -2 | ± | 13 | 0  | ± | 17 | -1 | ± | 14 | 41 | ± | 27 | 31 | ± | 27 | 0 | ± | 15 | <0.001 |
| 3013 | wm-lh-lingual                  | 3  | ± | 17 | 0  | ± | 13 | 8  | ± | 16 | 11 | ± | 20 | 41 | ± | 29 | 29 | ± | 26 | 5 | ± | 14 | <0.001 |
| 3014 | wm-lh-medialorbitofrontal      | 2  | ± | 17 | -1 | ± | 13 | 3  | ± | 16 | 9  | ± | 20 | 50 | ± | 31 | 32 | ± | 29 | 1 | ± | 15 | <0.001 |
| 3015 | wm-lh-middletemporal           | 2  | ± | 26 | -2 | ± | 18 | 0  | ± | 22 | -8 | ± | 15 | 15 | ± | 26 | 28 | ± | 17 | 2 | ± | 18 | <0.001 |
| 3017 | wm-lh-paracentral              | 3  | ± | 19 | 0  | ± | 13 | 1  | ± | 20 | -6 | ± | 13 | 12 | ± | 23 | 22 | ± | 16 | 1 | ± | 16 | <0.001 |
| 3016 | wm-lh-parahippocampal          | 3  | ± | 23 | -1 | ± | 16 | 11 | ± | 20 | 23 | ± | 29 | 60 | ± | 34 | 29 | ± | 29 | 3 | ± | 17 | <0.001 |
| 3018 | wm-lh-parsopercularis          | 2  | ± | 23 | -2 | ± | 17 | -2 | ± | 21 | -7 | ± | 14 | 27 | ± | 28 | 25 | ± | 16 | 1 | ± | 17 | <0.001 |
| 3019 | wm-lh-parsorbitalis            | -1 | ± | 20 | -4 | ± | 13 | -3 | ± | 20 | -5 | ± | 14 | 39 | ± | 32 | 37 | ± | 28 | 0 | ± | 15 | <0.001 |
| 3020 | wm-lh-parstriangularis         | 0  | ± | 22 | -3 | ± | 15 | -2 | ± | 20 | -6 | ± | 14 | 35 | ± | 28 | 32 | ± | 25 | 0 | ± | 17 | <0.001 |
| 3021 | wm-lh-pericalcarine            | 3  | ± | 13 | 2  | ± | 11 | 10 | ± | 14 | 10 | ± | 18 | 41 | ± | 30 | 38 | ± | 33 | 6 | ± | 13 | <0.001 |
| 3022 | wm-lh-postcentral              | 3  | ± | 22 | -1 | ± | 16 | 0  | ± | 22 | -6 | ± | 15 | 23 | ± | 31 | 28 | ± | 15 | 2 | ± | 18 | <0.001 |
| 3023 | wm-lh-posteriorcingulate       | 3  | ± | 19 | 0  | ± | 13 | 6  | ± | 21 | 3  | ± | 16 | 34 | ± | 28 | 26 | ± | 26 | 2 | ± | 16 | <0.001 |
| 3024 | wm-lh-precentral               | 3  | ± | 22 | -1 | ± | 16 | 0  | ± | 21 | -7 | ± | 15 | 11 | ± | 25 | 21 | ± | 9  | 1 | ± | 17 | <0.001 |
| 3025 | wm-lh-precuneus                | 3  | ± | 17 | 0  | ± | 12 | 3  | ± | 19 | -2 | ± | 13 | 24 | ± | 24 | 28 | ± | 22 | 3 | ± | 15 | <0.001 |
| 3026 | wm-lh-rostralanteriorcingulate | 2  | ± | 17 | 0  | ± | 13 | 6  | ± | 18 | 14 | ± | 20 | 52 | ± | 28 | 30 | ± | 27 | 1 | ± | 15 | <0.001 |
| 3027 | wm-lh-rostralmiddlefrontal     | 0  | ± | 20 | -3 | ± | 14 | -3 | ± | 18 | -9 | ± | 13 | 11 | ± | 21 | 28 | ± | 17 | 0 | ± | 16 | <0.001 |
| 3028 | wm-lh-superiorfrontal          | 2  | ± | 18 | -2 | ± | 13 | -2 | ± | 18 | -7 | ± | 13 | 14 | ± | 20 | 27 | ± | 15 | 0 | ± | 16 | <0.001 |
| 3029 | wm-lh-superiorparietal         | 3  | ± | 18 | 1  | ± | 12 | 1  | ± | 19 | -5 | ± | 13 | 10 | ± | 20 | 23 | ± | 11 | 3 | ± | 15 | <0.001 |
| 3030 | wm-lh-superiortemporal         | 2  | ± | 25 | -2 | ± | 18 | 1  | ± | 22 | -2 | ± | 17 | 36 | ± | 31 | 32 | ± | 27 | 2 | ± | 18 | <0.001 |
| 3031 | wm-lh-supramarginal            | 3  | ± | 24 | -1 | ± | 17 | 1  | ± | 22 | -6 | ± | 15 | 22 | ± | 26 | 35 | ± | 27 | 2 | ± | 18 | <0.001 |
| 3033 | wm-lh-temporalpole             | 2  | ± | 23 | -1 | ± | 16 | 1  | ± | 19 | 5  | ± | 20 | 63 | ± | 43 | 42 | ± | 44 | 2 | ± | 18 | <0.001 |
| 3034 | wm-lh-transversetemporal       | 3  | ± | 25 | -1 | ± | 18 | 2  | ± | 22 | 3  | ± | 18 | 43 | ± | 30 | 29 | ± | 27 | 3 | ± | 18 | <0.001 |
| 4001 | wm-rh-bankssts                 | 7  | ± | 20 | 1  | ± | 16 | 3  | ± | 23 | -5 | ± | 14 | 20 | ± | 24 | 22 | ± | 19 | 3 | ± | 18 | <0.001 |
| 4002 | wm-rh-caudalanteriorcingulate  | 2  | ± | 17 | -1 | ± | 12 | 5  | ± | 18 | 8  | ± | 20 | 46 | ± | 27 | 25 | ± | 30 | 1 | ± | 14 | <0.001 |
| 4003 | wm-rh-caudalmiddlefrontal      | 5  | ± | 19 | 0  | ± | 14 | 0  | ± | 21 | -8 | ± | 13 | 7  | ± | 21 | 18 | ± | 9  | 0 | ± | 16 | <0.001 |
| 4005 | wm-rh-cuneus                   | 3  | ± | 12 | 0  | ± | 9  | 2  | ± | 15 | -1 | ± | 13 | 26 | ± | 25 | 30 | ± | 26 | 4 | ± | 13 | <0.001 |
| 4006 | wm-rh-entorhinal               | 4  | ± | 18 | -1 | ± | 14 | 4  | ± | 20 | 7  | ± | 22 | 59 | ± | 34 | 33 | ± | 33 | 0 | ± | 15 | <0.001 |
| 4032 | wm-rh-frontalpole              | 0  | ± | 13 | -2 | ± | 9  | -4 | ± | 15 | -6 | ± | 11 | 57 | ± | 34 | 45 | ± | 37 | 2 | ± | 12 | <0.001 |
| 4007 | wm-rh-fusiform                 | 5  | ± | 18 | 1  | ± | 14 | 5  | ± | 19 | 0  | ± | 14 | 34 | ± | 26 | 26 | ± | 26 | 4 | ± | 16 | <0.001 |
| 4008 | wm-rh-inferiorparietal         | 6  | ± | 18 | 2  | ± | 13 | 4  | ± | 21 | -3 | ± | 13 | 12 | ± | 21 | 17 | ± | 9  | 3 | ± | 16 | <0.001 |
| 4009 | wm-rh-inferiortemporal         | 6  | ± | 20 | 1  | ± | 17 | 2  | ± | 22 | -6 | ± | 13 | 15 | ± | 22 | 24 | ± | 17 | 3 | ± | 17 | <0.001 |
| 4035 | wm-rh-insula                   | 4  | ± | 19 | 0  | ± | 15 | 2  | ± | 21 | 0  | ± | 16 | 35 | ± | 28 | 26 | ± | 26 | 2 | ± | 17 | <0.001 |
| 4010 | wm-rh-isthmuscingulate         | 3  | ± | 16 | 0  | ± | 12 | 8  | ± | 19 | 10 | ± | 19 | 40 | ± | 27 | 24 | ± | 28 | 3 | ± | 15 | <0.001 |
| 4011 | wm-rh-lateraloccipital         | 5  | ± | 13 | 1  | ± | 11 | 3  | ± | 16 | -2 | ± | 12 | 9  | ± | 18 | 13 | ± | 8  | 6 | ± | 13 | <0.001 |
| 4012 | wm-rh-lateralorbitofrontal     | 4  | ± | 17 | 0  | ± | 12 | 1  | ± | 19 | -1 | ± | 14 | 43 | ± | 28 | 33 | ± | 33 | 1 | ± | 14 | <0.001 |
| 4013 | wm-rh-lingual                  | 4  | ± | 15 | 1  | ± | 12 | 6  | ± | 15 | 7  | ± | 15 | 42 | ± | 25 | 27 | ± | 26 | 5 | ± | 13 | <0.001 |
| 4014 | wm-rh-medialorbitofrontal      | 3  | ± | 15 | -1 | ± | 11 | 4  | ± | 16 | 8  | ± | 19 | 53 | ± | 30 | 34 | ± | 32 | 1 | ± | 14 | <0.001 |

|                                            |                                             |   |   |    |    |   |    |     |   |    |     |   |    |     |   |    |    |   |    |   |   |    |        |
|--------------------------------------------|---------------------------------------------|---|---|----|----|---|----|-----|---|----|-----|---|----|-----|---|----|----|---|----|---|---|----|--------|
| 4015                                       | wm-rh-middletemporal                        | 7 | ± | 21 | 1  | ± | 16 | 2   | ± | 24 | -6  | ± | 13 | 16  | ± | 26 | 19 | ± | 11 | 4 | ± | 18 | <0.001 |
| 4017                                       | wm-rh-paracentral                           | 3 | ± | 17 | 0  | ± | 13 | 1   | ± | 20 | -5  | ± | 13 | 15  | ± | 23 | 23 | ± | 18 | 1 | ± | 16 | <0.001 |
| 4016                                       | wm-rh-parahippocampal                       | 5 | ± | 20 | 0  | ± | 15 | 11  | ± | 22 | 21  | ± | 25 | 60  | ± | 32 | 26 | ± | 30 | 3 | ± | 16 | <0.001 |
| 4018                                       | wm-rh-parsopercularis                       | 5 | ± | 20 | 0  | ± | 15 | 0   | ± | 22 | -6  | ± | 14 | 29  | ± | 27 | 24 | ± | 19 | 1 | ± | 17 | <0.001 |
| 4019                                       | wm-rh-parsorbitalis                         | 4 | ± | 17 | -1 | ± | 12 | -1  | ± | 19 | -6  | ± | 12 | 43  | ± | 29 | 36 | ± | 32 | 1 | ± | 14 | <0.001 |
| 4020                                       | wm-rh-parstriangularis                      | 4 | ± | 19 | 0  | ± | 15 | 0   | ± | 20 | -7  | ± | 13 | 36  | ± | 28 | 31 | ± | 32 | 1 | ± | 15 | <0.001 |
| 4021                                       | wm-rh-pericalcarine                         | 2 | ± | 12 | 0  | ± | 9  | 5   | ± | 15 | 3   | ± | 15 | 35  | ± | 27 | 30 | ± | 27 | 5 | ± | 13 | <0.001 |
| 4022                                       | wm-rh-postcentral                           | 5 | ± | 20 | 0  | ± | 15 | 0   | ± | 22 | -6  | ± | 14 | 23  | ± | 29 | 24 | ± | 13 | 1 | ± | 18 | <0.001 |
| 4023                                       | wm-rh-posteriorcingulate                    | 3 | ± | 18 | -1 | ± | 12 | 5   | ± | 20 | 1   | ± | 15 | 34  | ± | 26 | 24 | ± | 25 | 1 | ± | 15 | <0.001 |
| 4024                                       | wm-rh-precentral                            | 5 | ± | 19 | 0  | ± | 14 | 0   | ± | 22 | -7  | ± | 14 | 11  | ± | 23 | 19 | ± | 10 | 0 | ± | 17 | <0.001 |
| 4025                                       | wm-rh-precuneus                             | 3 | ± | 15 | 1  | ± | 11 | 3   | ± | 18 | -2  | ± | 13 | 29  | ± | 26 | 28 | ± | 22 | 3 | ± | 14 | <0.001 |
| 4026                                       | wm-rh-rostralanteriorcingulate              | 3 | ± | 15 | -1 | ± | 12 | 4   | ± | 16 | 9   | ± | 18 | 52  | ± | 29 | 28 | ± | 30 | 0 | ± | 13 | <0.001 |
| 4027                                       | wm-rh-rostralmiddlefrontal                  | 3 | ± | 17 | -1 | ± | 13 | -1  | ± | 18 | -9  | ± | 12 | 14  | ± | 20 | 27 | ± | 21 | 1 | ± | 15 | <0.001 |
| 4028                                       | wm-rh-superiorfrontal                       | 3 | ± | 17 | -1 | ± | 13 | -2  | ± | 18 | -7  | ± | 13 | 17  | ± | 20 | 25 | ± | 15 | 0 | ± | 15 | <0.001 |
| 4029                                       | wm-rh-superiorparietal                      | 4 | ± | 15 | 1  | ± | 11 | 1   | ± | 19 | -4  | ± | 13 | 8   | ± | 19 | 18 | ± | 8  | 3 | ± | 15 | <0.001 |
| 4030                                       | wm-rh-superiortemporal                      | 6 | ± | 21 | 0  | ± | 16 | 2   | ± | 23 | -3  | ± | 15 | 41  | ± | 31 | 28 | ± | 25 | 3 | ± | 18 | <0.001 |
| 4031                                       | wm-rh-supramarginal                         | 6 | ± | 20 | 1  | ± | 16 | 1   | ± | 22 | -5  | ± | 13 | 24  | ± | 26 | 28 | ± | 21 | 2 | ± | 18 | <0.001 |
| 4033                                       | wm-rh-temporalpole                          | 3 | ± | 17 | 0  | ± | 13 | -1  | ± | 18 | 3   | ± | 18 | 62  | ± | 35 | 42 | ± | 37 | 1 | ± | 15 | <0.001 |
| 4034                                       | wm-rh-transversetemporal                    | 7 | ± | 21 | 1  | ± | 16 | 3   | ± | 23 | 3   | ± | 18 | 46  | ± | 31 | 24 | ± | 22 | 3 | ± | 19 | <0.001 |
| <b><i>Other selected brain regions</i></b> |                                             |   |   |    |    |   |    |     |   |    |     |   |    |     |   |    |    |   |    |   |   |    |        |
| 85                                         | Optic-Chiasm                                | 8 | ± | 18 | 33 | ± | 28 | 120 | ± | 87 | 142 | ± | 66 | 96  | ± | 49 | 41 | ± | 51 | 2 | ± | 15 | <0.001 |
| 16                                         | Brain-Stem                                  | 4 | ± | 19 | 3  | ± | 15 | 13  | ± | 21 | 13  | ± | 19 | 29  | ± | 24 | 17 | ± | 20 | 3 | ± | 16 | <0.001 |
| 255                                        | CC_Anterior                                 | 2 | ± | 17 | 0  | ± | 13 | 14  | ± | 21 | 28  | ± | 28 | 54  | ± | 28 | 23 | ± | 28 | 0 | ± | 14 | <0.001 |
| 253                                        | CC_Central                                  | 0 | ± | 20 | 0  | ± | 14 | 29  | ± | 29 | 46  | ± | 41 | 70  | ± | 45 | 31 | ± | 38 | 1 | ± | 15 | <0.001 |
| 254                                        | CC_Mid_Anterior                             | 2 | ± | 19 | 1  | ± | 14 | 25  | ± | 33 | 38  | ± | 41 | 66  | ± | 41 | 38 | ± | 47 | 3 | ± | 16 | <0.001 |
| 252                                        | CC_Mid_Posterior                            | 2 | ± | 20 | 1  | ± | 15 | 20  | ± | 24 | 34  | ± | 31 | 60  | ± | 35 | 25 | ± | 29 | 3 | ± | 15 | <0.001 |
| 251                                        | CC_Posterior                                | 2 | ± | 19 | 1  | ± | 13 | 18  | ± | 26 | 28  | ± | 34 | 61  | ± | 42 | 36 | ± | 45 | 3 | ± | 16 | <0.001 |
| 13, 52                                     | Left-Pallidum, Right-Pallidum               | 3 | ± | 20 | -1 | ± | 15 | 0   | ± | 20 | -6  | ± | 13 | 3   | ± | 19 | 6  | ± | 10 | 1 | ± | 16 | <0.001 |
| 12, 51                                     | Left-Putamen, Right-Putamen                 | 4 | ± | 21 | 0  | ± | 15 | 0   | ± | 20 | -6  | ± | 13 | 14  | ± | 20 | 19 | ± | 18 | 2 | ± | 16 | <0.001 |
| 10, 49                                     | Left-Thalamus-Proper, Right-Thalamus-Proper | 5 | ± | 21 | 2  | ± | 16 | 10  | ± | 22 | 10  | ± | 17 | 33  | ± | 27 | 20 | ± | 24 | 3 | ± | 17 | <0.001 |
| 11, 50                                     | Left-Caudate, Right-Caudate                 | 4 | ± | 20 | 1  | ± | 15 | 13  | ± | 21 | 28  | ± | 29 | 62  | ± | 42 | 41 | ± | 46 | 2 | ± | 17 | <0.001 |
| 26, 58                                     | Left-Accumbens-area, Right-Accumbens-area   | 5 | ± | 19 | 2  | ± | 14 | 16  | ± | 21 | 27  | ± | 26 | 74  | ± | 38 | 41 | ± | 41 | 4 | ± | 16 | <0.001 |
| 18, 54                                     | Left-Amygdala, Right-Amygdala               | 5 | ± | 23 | 3  | ± | 16 | 19  | ± | 25 | 33  | ± | 35 | 76  | ± | 41 | 46 | ± | 49 | 4 | ± | 16 | <0.001 |
| 17, 53                                     | Left-Hippocampus, Right-Hippocampus         | 5 | ± | 23 | 10 | ± | 18 | 65  | ± | 54 | 87  | ± | 62 | 100 | ± | 45 | 47 | ± | 52 | 5 | ± | 17 | <0.001 |

| <b>CSF regions</b> |                                                 |     |   |      |      |   |      |      |   |      |      |   |      |      |   |      |     |   |      |    |   |    |        |
|--------------------|-------------------------------------------------|-----|---|------|------|---|------|------|---|------|------|---|------|------|---|------|-----|---|------|----|---|----|--------|
| 24                 | CSF                                             | 23  | ± | 29   | 94   | ± | 80   | 448  | ± | 346  | 755  | ± | 323  | 719  | ± | 363  | 256 | ± | 304  | 2  | ± | 16 | <0.001 |
| 14                 | 3rd-Ventricle                                   | 96  | ± | 73   | 642  | ± | 688  | 1648 | ± | 1199 | 1647 | ± | 909  | 1156 | ± | 592  | 493 | ± | 576  | 1  | ± | 21 | <0.001 |
| 15                 | 4th-Ventricle                                   | 676 | ± | 1236 | 1520 | ± | 1202 | 2794 | ± | 1347 | 2430 | ± | 842  | 1234 | ± | 494  | 502 | ± | 589  | 0  | ± | 15 | <0.001 |
| 5, 44              | Left-Inf-Lat-Vent, Right-Inf-Lat-Vent           | 8   | ± | 32   | 92   | ± | 103  | 880  | ± | 760  | 1157 | ± | 747  | 1025 | ± | 591  | 394 | ± | 502  | 1  | ± | 19 | <0.001 |
| 4, 43              | Left-Lateral-Ventricle, Right-Lateral-Ventricle | 11  | ± | 28   | 296  | ± | 350  | 2598 | ± | 2179 | 3041 | ± | 1808 | 2272 | ± | 1217 | 869 | ± | 1104 | -7 | ± | 19 | <0.001 |

Data presented as mean ± standard deviation. \*Sign.: Significant differences over time was determined by a linear mixed model for repeated measurements. SegID – FreeSurfer segmentation identity; Ctx - Cortex; lh – left hemisphere; rh – right hemisphere; wm – white matter; CC – corpus callosum; CSF – cerebrospinal fluid.

**Table S4.** Percentage change in normalized T1 signals at various time points after intrathecal gadobutrol in REF and iNPH individuals

| SegID                                    | Structure name                 | Group | Time after intrathecal gadobutrol |    |       |         |    |       |         |       |       |         |    |       |      |    |       |       |     |       |         |       |       | Overall test of time |       |   |    |       |        |        |
|------------------------------------------|--------------------------------|-------|-----------------------------------|----|-------|---------|----|-------|---------|-------|-------|---------|----|-------|------|----|-------|-------|-----|-------|---------|-------|-------|----------------------|-------|---|----|-------|--------|--------|
|                                          |                                |       | 1.5 - 2 h                         |    |       | 2 - 4 h |    |       | 4 - 6 h |       |       | 6 - 9 h |    |       | 24h  |    |       | 48 h  |     |       | 4 weeks |       |       |                      |       |   |    |       |        |        |
|                                          |                                |       | Mean                              | SD | *Sign | Mean    | SD | *Sign | Mean    | SD    | *Sign | Mean    | SD | *Sign | Mean | SD | *Sign | Mean  | SD  | *Sign | Mean    | SD    | *Sign |                      | *Sign |   |    |       |        |        |
| <i>Some cortical grey matter regions</i> |                                |       |                                   |    |       |         |    |       |         |       |       |         |    |       |      |    |       |       |     |       |         |       |       |                      |       |   |    |       |        |        |
| 1002                                     | ctx-lh-caudalanteriorcingulate | REF   | -3                                | ±  | 8     | 0.435   | -2 | ±     | 15      | 0.677 | 32    | ±       | 54 | 0.441 | 64   | ±  | 62    | 0.987 | 63  | ±     | 60      | 0.021 | 70    |                      | -2    | ± | 19 | 0.771 | <0.001 |        |
| 1002                                     | ctx-lh-caudalanteriorcingulate | iNPH  | 2                                 | ±  | 20    |         | 1  | ±     | 15      |       | 20    | ±       | 23 |       | 66   | ±  | 63    |       | 127 | ±     | 56      |       | 68    | ±                    | 65    | 5 | ±  | 18    |        | <0.001 |
| 1003                                     | ctx-lh-caudalmiddlefrontal     | REF   | -3                                | ±  | 9     | 0.503   | -5 | ±     | 16      | 0.601 | 6     | ±       | 32 | 0.666 | 2    | ±  | 30    | 0.366 | 43  | ±     | 65      | 0.881 | 36    |                      | -6    | ± | 20 | 0.855 | <0.001 |        |
| 1003                                     | ctx-lh-caudalmiddlefrontal     | iNPH  | 3                                 | ±  | 25    |         | -1 | ±     | 16      |       | 0     | ±       | 22 |       | -6   | ±  | 16    |       | 39  | ±     | 53      |       | 64    | ±                    | 30    | 2 | ±  | 19    |        | <0.001 |
| 1005                                     | ctx-lh-cuneus                  | REF   | 1                                 | ±  | 8     | 0.399   | -1 | ±     | 13      | 0.669 | 13    | ±       | 42 | 0.429 | 34   | ±  | 51    | 0.145 | 47  | ±     | 55      | 0.398 | 85    |                      | -5    | ± | 19 | 0.367 | 0.088  |        |
| 1005                                     | ctx-lh-cuneus                  | iNPH  | 2                                 | ±  | 12    |         | 1  | ±     | 9       |       | 5     | ±       | 16 |       | 8    | ±  | 18    |       | 67  | ±     | 45      |       | 69    | ±                    | 63    | 7 | ±  | 14    |        | <0.001 |
| 1006                                     | ctx-lh-entorhinal              | REF   | 1                                 | ±  | 6     | 0.782   | 6  | ±     | 16      | 0.776 | 58    | ±       | 61 | 0.713 | 87   | ±  | 75    | 0.747 | 59  | ±     | 50      | 0.064 | 52    |                      | -6    | ± | 17 | 0.526 | 0.001  |        |
| 1006                                     | ctx-lh-entorhinal              | iNPH  | 4                                 | ±  | 27    |         | 8  | ±     | 18      |       | 73    | ±       | 51 |       | 103  | ±  | 71    |       | 112 | ±     | 55      |       | 64    | ±                    | 65    | 5 | ±  | 21    |        | <0.001 |
| 1032                                     | ctx-lh-frontalpole             | REF   | 0                                 | ±  | 10    | 0.884   | -4 | ±     | 13      | 0.743 | 10    | ±       | 19 | 0.115 | 32   | ±  | 41    | 0.180 | 94  | ±     | 78      | 0.230 | 106   |                      | 0     | ± | 20 | 0.616 | <0.001 |        |
| 1032                                     | ctx-lh-frontalpole             | iNPH  | -1                                | ±  | 16    |         | -2 | ±     | 11      |       | -1    | ±       | 15 |       | 11   | ±  | 27    |       | 136 | ±     | 67      |       | 95    | ±                    | 76    | 4 | ±  | 14    |        | <0.001 |
| 1007                                     | ctx-lh-fusiform                | REF   | 1                                 | ±  | 8     | 0.361   | 1  | ±     | 16      | 0.907 | 21    | ±       | 41 | 0.500 | 35   | ±  | 55    | 0.683 | 41  | ±     | 51      | 0.127 | 51    |                      | -7    | ± | 18 | 0.850 | 0.151  |        |
| 1007                                     | ctx-lh-fusiform                | iNPH  | 3                                 | ±  | 26    |         | 2  | ±     | 18      |       | 14    | ±       | 24 |       | 28   | ±  | 37    |       | 78  | ±     | 43      |       | 63    | ±                    | 55    | 6 | ±  | 19    |        | <0.001 |
| 1008                                     | ctx-lh-inferiorparietal        | REF   | -3                                | ±  | 7     | 0.296   | -6 | ±     | 14      | 0.332 | 1     | ±       | 24 | 0.909 | 1    | ±  | 19    | 0.379 | 32  | ±     | 49      | 0.855 | 38    |                      | -6    | ± | 19 | 0.412 | 0.035  |        |
| 1008                                     | ctx-lh-inferiorparietal        | iNPH  | 3                                 | ±  | 26    |         | 1  | ±     | 17      |       | 4     | ±       | 23 |       | -4   | ±  | 15    |       | 28  | ±     | 43      |       | 51    | ±                    | 19    | 6 | ±  | 17    |        | <0.001 |
| 1009                                     | ctx-lh-inferiortemporal        | REF   | -2                                | ±  | 8     | 0.239   | -4 | ±     | 16      | 0.765 | 11    | ±       | 36 | 0.488 | 8    | ±  | 36    | 0.345 | 34  | ±     | 52      | 0.727 | 34    |                      | -8    | ± | 18 | 0.610 | 0.034  |        |
| 1009                                     | ctx-lh-inferiortemporal        | iNPH  | 3                                 | ±  | 32    |         | -1 | ±     | 21      |       | 3     | ±       | 28 |       | -2   | ±  | 19    |       | 42  | ±     | 42      |       | 62    | ±                    | 39    | 6 | ±  | 21    |        | <0.001 |
| 1035                                     | ctx-lh-insula                  | REF   | -1                                | ±  | 8     | 0.965   | 4  | ±     | 20      | 0.816 | 56    | ±       | 74 | 0.989 | 88   | ±  | 91    | 0.984 | 62  | ±     | 62      | 0.082 | 60    |                      | -6    | ± | 18 | 0.376 | 0.007  |        |
| 1035                                     | ctx-lh-insula                  | iNPH  | 2                                 | ±  | 27    |         | 6  | ±     | 19      |       | 61    | ±       | 50 |       | 92   | ±  | 63    |       | 120 | ±     | 55      |       | 70    | ±                    | 68    | 6 | ±  | 20    |        | <0.001 |
| 1010                                     | ctx-lh-isthmuscingulate        | REF   | -1                                | ±  | 7     | 0.416   | -1 | ±     | 14      | 0.220 | 21    | ±       | 40 | 0.728 | 36   | ±  | 46    | 0.404 | 40  | ±     | 43      | 0.004 | 64    |                      | -6    | ± | 18 | 0.468 | 0.021  |        |
| 1010                                     | ctx-lh-isthmuscingulate        | iNPH  | 4                                 | ±  | 19    |         | 6  | ±     | 11      |       | 28    | ±       | 25 |       | 54   | ±  | 38    |       | 100 | ±     | 43      |       | 65    | ±                    | 65    | 7 | ±  | 17    |        | <0.001 |
| 1011                                     | ctx-lh-lateraloccipital        | REF   | 2                                 | ±  | 5     | 0.269   | -2 | ±     | 12      | 0.647 | -1    | ±       | 20 | 0.643 | 1    | ±  | 15    | 0.674 | 19  | ±     | 29      | 0.978 | 32    |                      | -4    | ± | 20 | 0.257 | 0.223  |        |
| 1011                                     | ctx-lh-lateraloccipital        | iNPH  | 3                                 | ±  | 17    |         | 1  | ±     | 13      |       | 5     | ±       | 18 |       | 1    | ±  | 14    |       | 20  | ±     | 26      |       | 48    | ±                    | 23    | 9 | ±  | 13    |        | <0.001 |
| 1012                                     | ctx-lh-lateralorbitofrontal    | REF   | -2                                | ±  | 6     | 0.468   | 1  | ±     | 14      | 0.624 | 44    | ±       | 56 | 0.479 | 80   | ±  | 63    | 0.549 | 68  | ±     | 58      | 0.068 | 62    |                      | -5    | ± | 18 | 0.908 | <0.001 |        |
| 1012                                     | ctx-lh-lateralorbitofrontal    | iNPH  | 2                                 | ±  | 23    |         | 4  | ±     | 13      |       | 34    | ±       | 23 |       | 66   | ±  | 49    |       | 117 | ±     | 55      |       | 70    | ±                    | 67    | 4 | ±  | 15    |        | <0.001 |
| 1013                                     | ctx-lh-lingual                 | REF   | 3                                 | ±  | 7     | 0.402   | 2  | ±     | 14      | 0.686 | 14    | ±       | 28 | 0.955 | 31   | ±  | 40    | 0.810 | 42  | ±     | 47      | 0.030 | 62    |                      | -5    | ± | 19 | 0.492 | 0.100  |        |
| 1013                                     | ctx-lh-lingual                 | iNPH  | 4                                 | ±  | 19    |         | 4  | ±     | 13      |       | 17    | ±       | 21 |       | 38   | ±  | 40    |       | 93  | ±     | 47      |       | 69    | ±                    | 67    | 8 | ±  | 15    |        | <0.001 |
| 1014                                     | ctx-lh-medialorbitofrontal     | REF   | -2                                | ±  | 4     | 0.777   | 6  | ±     | 18      | 0.664 | 68    | ±       | 78 | 0.885 | 121  | ±  | 92    | 0.823 | 79  | ±     | 66      | 0.044 | 76    |                      | -4    | ± | 17 | 0.535 | <0.001 |        |
| 1014                                     | ctx-lh-medialorbitofrontal     | iNPH  | 2                                 | ±  | 16    |         | 9  | ±     | 14      |       | 79    | ±       | 56 |       | 133  | ±  | 83    |       | 141 | ±     | 59      |       | 81    | ±                    | 77    | 5 | ±  | 16    |        | <0.001 |
| 1015                                     | ctx-lh-middletemporal          | REF   | -4                                | ±  | 9     | 0.187   | -5 | ±     | 16      | 0.614 | 12    | ±       | 41 | 0.460 | 12   | ±  | 40    | 0.203 | 50  | ±     | 67      | 0.815 | 69    |                      | -8    | ± | 17 | 0.600 | 0.025  |        |
| 1015                                     | ctx-lh-middletemporal          | iNPH  | 5                                 | ±  | 34    |         | 0  | ±     | 23      |       | 3     | ±       | 29 |       | -4   | ±  | 20    |       | 57  | ±     | 58      |       | 69    | ±                    | 48    | 7 | ±  | 22    |        | <0.001 |
| 1017                                     | ctx-lh-paracentral             | REF   | -4                                | ±  | 8     | 0.128   | -5 | ±     | 14      | 0.292 | 11    | ±       | 40 | 0.622 | 16   | ±  | 44    | 0.385 | 43  | ±     | 46      | 0.718 | 27    |                      | -5    | ± | 19 | 0.920 | <0.001 |        |
| 1017                                     | ctx-lh-paracentral             | iNPH  | 3                                 | ±  | 19    |         | 1  | ±     | 13      |       | 4     | ±       | 21 |       | 5    | ±  | 19    |       | 51  | ±     | 48      |       | 49    | ±                    | 35    | 3 | ±  | 18    |        | <0.001 |
| 1016                                     | ctx-lh-parahippocampal         | REF   | 1                                 | ±  | 7     | 0.821   | 17 | ±     | 37      | 0.982 | 77    | ±       | 92 | 0.799 | 97   | ±  | 100   | 0.674 | 54  | ±     | 52      | 0.130 | 45    |                      | -6    | ± | 18 | 0.245 | <0.001 |        |

|      |                                 |      |    |   |    |       |    |   |    |       |    |   |    |       |     |   |    |       |     |   |    |       |    |   |    |    |   |    |       |        |        |
|------|---------------------------------|------|----|---|----|-------|----|---|----|-------|----|---|----|-------|-----|---|----|-------|-----|---|----|-------|----|---|----|----|---|----|-------|--------|--------|
| 1016 | ctx-lh-parahippocampal          | iNPH | 6  | ± | 26 |       | 17 | ± | 23 |       | 92 | ± | 79 |       | 119 | ± | 74 |       | 112 | ± | 52 |       | 62 | ± | 65 |    | 6 | ±  | 18    |        | <0.001 |
| 1018 | ctx-lh-parsopercularis          | REF  | -4 | ± | 8  | 0.584 | -4 | ± | 16 | 0.767 | 25 | ± | 51 | 0.429 | 36  | ± | 59 | 0.473 | 58  | ± | 62 | 0.105 | 60 |   |    | -6 | ± | 18 | 0.925 | 0.038  |        |
| 1018 | ctx-lh-parsopercularis          | iNPH | 3  | ± | 27 |       | -1 | ± | 18 |       | 10 | ± | 28 |       | 22  | ± | 29 |       | 105 | ± | 58 |       | 66 | ± | 55 |    | 3 | ±  | 19    |        | <0.001 |
| 1019 | ctx-lh-parsorbitalis            | REF  | -2 | ± | 7  | 0.677 | -4 | ± | 14 | 0.901 | 18 | ± | 34 | 0.394 | 38  | ± | 38 | 0.084 | 73  | ± | 65 | 0.199 | 68 |   |    | -3 | ± | 21 | 0.984 | <0.001 |        |
| 1019 | ctx-lh-parsorbitalis            | iNPH | -2 | ± | 24 |       | -3 | ± | 14 |       | 6  | ± | 28 |       | 14  | ± | 23 |       | 111 | ± | 58 |       | 76 | ± | 64 |    | 4 | ±  | 17    |        | <0.001 |
| 1020 | ctx-lh-parstriangularis         | REF  | -4 | ± | 9  | 0.697 | -5 | ± | 15 | 0.805 | 10 | ± | 32 | 0.780 | 19  | ± | 34 | 0.975 | 59  | ± | 57 | 0.060 | 68 |   |    | -5 | ± | 20 | 0.903 | 0.007  |        |
| 1020 | ctx-lh-parstriangularis         | iNPH | 0  | ± | 26 |       | -3 | ± | 16 |       | 8  | ± | 28 |       | 22  | ± | 30 |       | 110 | ± | 57 |       | 77 | ± | 69 |    | 3 | ±  | 18    |        | <0.001 |
| 1021 | ctx-lh-pericalcarine            | REF  | 2  | ± | 5  | 0.435 | -1 | ± | 13 | 0.505 | 15 | ± | 45 | 0.639 | 37  | ± | 54 | 0.381 | 40  | ± | 47 | 0.036 | 64 |   |    | -5 | ± | 19 | 0.384 | 0.084  |        |
| 1021 | ctx-lh-pericalcarine            | iNPH | 2  | ± | 12 |       | 3  | ± | 9  |       | 11 | ± | 15 |       | 21  | ± | 21 |       | 86  | ± | 44 |       | 77 | ± | 67 |    | 9 | ±  | 14    |        | <0.001 |
| 1022 | ctx-lh-postcentral              | REF  | -6 | ± | 9  | 0.284 | -5 | ± | 16 | 0.504 | 18 | ± | 47 | 0.515 | 23  | ± | 52 | 0.325 | 49  | ± | 64 | 0.271 | 56 |   |    | -8 | ± | 18 | 0.791 | <0.001 |        |
| 1022 | ctx-lh-postcentral              | iNPH | 4  | ± | 27 |       | 0  | ± | 19 |       | 6  | ± | 27 |       | 7   | ± | 22 |       | 81  | ± | 56 |       | 71 | ± | 53 |    | 4 | ±  | 20    |        | <0.001 |
| 1023 | ctx-lh-posteriorcingulate       | REF  | -3 | ± | 6  | 0.131 | -4 | ± | 14 | 0.334 | 20 | ± | 53 | 0.485 | 32  | ± | 57 | 0.693 | 49  | ± | 48 | 0.110 | 54 |   |    | -6 | ± | 18 | 0.995 | <0.001 |        |
| 1023 | ctx-lh-posteriorcingulate       | iNPH | 4  | ± | 21 |       | 2  | ± | 15 |       | 7  | ± | 24 |       | 25  | ± | 41 |       | 87  | ± | 55 |       | 60 | ± | 54 |    | 3 | ±  | 18    |        | <0.001 |
| 1024 | ctx-lh-precentral               | REF  | -5 | ± | 8  | 0.328 | -5 | ± | 16 | 0.510 | 15 | ± | 41 | 0.554 | 18  | ± | 45 | 0.325 | 45  | ± | 60 | 0.483 | 50 |   |    | -6 | ± | 19 | 0.933 | <0.001 |        |
| 1024 | ctx-lh-precentral               | iNPH | 5  | ± | 27 |       | 0  | ± | 18 |       | 5  | ± | 26 |       | 4   | ± | 22 |       | 64  | ± | 54 |       | 61 | ± | 38 |    | 2 | ±  | 20    |        | <0.001 |
| 1025 | ctx-lh-precuneus                | REF  | -2 | ± | 7  | 0.229 | -4 | ± | 13 | 0.263 | 10 | ± | 34 | 0.693 | 17  | ± | 40 | 0.393 | 40  | ± | 46 | 0.350 | 67 |   |    | -6 | ± | 19 | 0.578 | 0.001  |        |
| 1025 | ctx-lh-precuneus                | iNPH | 4  | ± | 17 |       | 2  | ± | 12 |       | 5  | ± | 20 |       | 6   | ± | 19 |       | 61  | ± | 48 |       | 55 | ± | 44 |    | 6 | ±  | 16    |        | <0.001 |
| 1026 | ctx-lh-rostralanteriorcingulate | REF  | -4 | ± | 7  | 0.769 | 3  | ± | 17 | 0.582 | 61 | ± | 82 | 0.695 | 105 | ± | 90 | 0.424 | 70  | ± | 66 | 0.018 | 71 |   |    | -4 | ± | 17 | 0.526 | <0.001 |        |
| 1026 | ctx-lh-rostralanteriorcingulate | iNPH | 1  | ± | 18 |       | 7  | ± | 12 |       | 79 | ± | 54 |       | 141 | ± | 92 |       | 143 | ± | 61 |       | 73 | ± | 71 |    | 6 | ±  | 17    |        | <0.001 |
| 1027 | ctx-lh-rostralmiddlefrontal     | REF  | -3 | ± | 9  | 0.784 | -5 | ± | 15 | 0.764 | 1  | ± | 22 | 0.804 | 2   | ± | 13 | 0.169 | 53  | ± | 53 | 0.811 | 56 |   |    | -3 | ± | 21 | 0.801 | <0.001 |        |
| 1027 | ctx-lh-rostralmiddlefrontal     | iNPH | -1 | ± | 22 |       | -3 | ± | 14 |       | -2 | ± | 22 |       | -6  | ± | 16 |       | 59  | ± | 52 |       | 86 | ± | 57 |    | 2 | ±  | 17    |        | <0.001 |
| 1028 | ctx-lh-superiorfrontal          | REF  | -4 | ± | 8  | 0.272 | -5 | ± | 13 | 0.467 | 11 | ± | 35 | 0.477 | 16  | ± | 42 | 0.330 | 56  | ± | 54 | 0.621 | 53 |   |    | -4 | ± | 19 | 0.993 | <0.001 |        |
| 1028 | ctx-lh-superiorfrontal          | iNPH | 3  | ± | 18 |       | 0  | ± | 13 |       | 2  | ± | 19 |       | 2   | ± | 17 |       | 67  | ± | 41 |       | 71 | ± | 42 |    | 3 | ±  | 17    |        | <0.001 |
| 1029 | ctx-lh-superiorparietal         | REF  | -2 | ± | 8  | 0.295 | -6 | ± | 14 | 0.213 | 3  | ± | 24 | 0.911 | 5   | ± | 22 | 0.324 | 37  | ± | 57 | 0.887 | 35 |   |    | -5 | ± | 19 | 0.383 | <0.001 |        |
| 1029 | ctx-lh-superiorparietal         | iNPH | 4  | ± | 18 |       | 2  | ± | 13 |       | 3  | ± | 21 |       | -2  | ± | 16 |       | 34  | ± | 48 |       | 50 | ± | 12 |    | 7 | ±  | 18    |        | <0.001 |
| 1030 | ctx-lh-superiortemporal         | REF  | -4 | ± | 9  | 0.497 | -2 | ± | 17 | 0.720 | 34 | ± | 61 | 0.430 | 56  | ± | 68 | 0.458 | 63  | ± | 71 | 0.148 | 74 |   |    | -7 | ± | 18 | 0.811 | 0.056  |        |
| 1030 | ctx-lh-superiortemporal         | iNPH | 5  | ± | 32 |       | 1  | ± | 22 |       | 19 | ± | 28 |       | 40  | ± | 35 |       | 109 | ± | 57 |       | 71 | ± | 64 |    | 6 | ±  | 22    |        | <0.001 |
| 1031 | ctx-lh-supramarginal            | REF  | -6 | ± | 8  | 0.281 | -6 | ± | 16 | 0.431 | 15 | ± | 44 | 0.566 | 22  | ± | 47 | 0.302 | 51  | ± | 66 | 0.171 | 64 |   |    | -9 | ± | 18 | 0.759 | 0.083  |        |
| 1031 | ctx-lh-supramarginal            | iNPH | 5  | ± | 32 |       | 0  | ± | 21 |       | 6  | ± | 26 |       | 6   | ± | 22 |       | 93  | ± | 57 |       | 78 | ± | 59 |    | 5 | ±  | 21    |        | <0.001 |
| 1033 | ctx-lh-temporalpole             | REF  | -1 | ± | 6  | 0.668 | 3  | ± | 15 | 0.710 | 44 | ± | 58 | 0.899 | 86  | ± | 73 | 0.941 | 72  | ± | 64 | 0.069 | 83 |   |    | -6 | ± | 19 | 0.962 | 0.010  |        |
| 1033 | ctx-lh-temporalpole             | iNPH | 4  | ± | 30 |       | 6  | ± | 19 |       | 46 | ± | 42 |       | 87  | ± | 62 |       | 130 | ± | 68 |       | 72 | ± | 75 |    | 8 | ±  | 21    |        | <0.001 |
| 1034 | ctx-lh-transversetemporal       | REF  | -3 | ± | 9  | 0.920 | 2  | ± | 22 | 0.865 | 49 | ± | 71 | 0.666 | 75  | ± | 86 | 0.948 | 47  | ± | 55 | 0.133 | 60 |   |    | -8 | ± | 17 | 0.589 | 0.001  |        |
| 1034 | ctx-lh-transversetemporal       | iNPH | 5  | ± | 28 |       | 4  | ± | 21 |       | 40 | ± | 38 |       | 76  | ± | 57 |       | 94  | ± | 48 |       | 55 | ± | 56 |    | 6 | ±  | 20    |        | <0.001 |
| 2002 | ctx-rh-caudalanteriorcingulate  | REF  | -5 | ± | 8  | 0.476 | -3 | ± | 14 | 0.572 | 28 | ± | 50 | 0.672 | 68  | ± | 66 | 0.769 | 63  | ± | 60 | 0.008 | 70 |   |    | -4 | ± | 18 | 0.835 | 0.001  |        |
| 2002 | ctx-rh-caudalanteriorcingulate  | iNPH | 3  | ± | 20 |       | 1  | ± | 14 |       | 22 | ± | 27 |       | 62  | ± | 49 |       | 137 | ± | 55 |       | 64 | ± | 60 |    | 4 | ±  | 16    |        | <0.001 |
| 2003 | ctx-rh-caudalmiddlefrontal      | REF  | -6 | ± | 7  | 0.162 | -7 | ± | 14 | 0.285 | 7  | ± | 35 | 0.537 | 7   | ± | 44 | 0.287 | 44  | ± | 67 | 0.990 | 68 |   |    | -6 | ± | 17 | 0.937 | <0.001 |        |
| 2003 | ctx-rh-caudalmiddlefrontal      | iNPH | 5  | ± | 20 |       | 1  | ± | 15 |       | -1 | ± | 21 |       | -8  | ± | 16 |       | 43  | ± | 55 |       | 59 | ± | 36 |    | 2 | ±  | 19    |        | <0.001 |
| 2005 | ctx-rh-cuneus                   | REF  | 2  | ± | 8  | 0.492 | 0  | ± | 14 | 0.664 | 9  | ± | 30 | 0.598 | 22  | ± | 36 | 0.353 | 46  | ± | 55 | 0.212 | 94 |   |    | -4 | ± | 19 | 0.440 | 0.088  |        |
| 2005 | ctx-rh-cuneus                   | iNPH | 2  | ± | 9  |       | 2  | ± | 7  |       | 6  | ± | 16 |       | 10  | ± | 20 |       | 80  | ± | 54 |       | 72 | ± | 72 |    | 7 | ±  | 14    |        | <0.001 |
| 2006 | ctx-rh-entorhinal               | REF  | -2 | ± | 7  | 0.366 | 5  | ± | 17 | 0.522 | 63 | ± | 62 | 0.861 | 97  | ± | 75 | 0.998 | 59  | ± | 52 | 0.016 | 46 |   |    | -8 | ± | 16 | 0.640 | 0.001  |        |

|      |                             |      |         |       |         |       |          |       |           |       |          |       |          |  |          |       |        |
|------|-----------------------------|------|---------|-------|---------|-------|----------|-------|-----------|-------|----------|-------|----------|--|----------|-------|--------|
| 2006 | ctx-rh-entorhinal           | iNPH | 7 ± 19  |       | 10 ± 15 |       | 63 ± 47  |       | 99 ± 68   |       | 121 ± 50 |       | 62 ± 71  |  | 4 ± 15   |       | <0.001 |
| 2032 | ctx-rh-frontalpole          | REF  | -2 ± 7  | 0.575 | -3 ± 13 | 0.566 | 7 ± 17   | 0.307 | 28 ± 25   | 0.058 | 93 ± 75  | 0.160 | 128      |  | 0 ± 21   | 0.669 | <0.001 |
| 2032 | ctx-rh-frontalpole          | iNPH | 1 ± 10  |       | 0 ± 7   |       | 0 ± 15   |       | 9 ± 19    |       | 141 ± 68 |       | 102 ± 92 |  | 4 ± 15   |       | <0.001 |
| 2007 | ctx-rh-fusiform             | REF  | -3 ± 6  | 0.204 | -1 ± 17 | 0.545 | 24 ± 44  | 0.431 | 37 ± 57   | 0.671 | 42 ± 52  | 0.083 | 43       |  | -9 ± 15  | 0.872 | 0.091  |
| 2007 | ctx-rh-fusiform             | iNPH | 7 ± 18  |       | 4 ± 14  |       | 13 ± 25  |       | 29 ± 38   |       | 87 ± 43  |       | 63 ± 66  |  | 6 ± 18   |       | <0.001 |
| 2008 | ctx-rh-inferiorparietal     | REF  | -3 ± 7  | 0.041 | -6 ± 13 | 0.083 | 3 ± 28   | 0.901 | 1 ± 29    | 0.672 | 28 ± 49  | 0.837 | 31       |  | -8 ± 16  | 0.509 | 0.004  |
| 2008 | ctx-rh-inferiorparietal     | iNPH | 9 ± 19  |       | 5 ± 13  |       | 4 ± 24   |       | -1 ± 17   |       | 32 ± 48  |       | 37 ± 7   |  | 5 ± 18   |       | <0.001 |
| 2009 | ctx-rh-inferiortemporal     | REF  | -6 ± 7  | 0.036 | -6 ± 14 | 0.216 | 5 ± 31   | 0.868 | 6 ± 28    | 0.557 | 32 ± 50  | 0.452 | 35       |  | -10 ± 16 | 0.277 | 0.013  |
| 2009 | ctx-rh-inferiortemporal     | iNPH | 9 ± 23  |       | 3 ± 19  |       | 5 ± 27   |       | 1 ± 18    |       | 49 ± 39  |       | 57 ± 48  |  | 8 ± 20   |       | <0.001 |
| 2035 | ctx-rh-insula               | REF  | -5 ± 7  | 0.818 | 2 ± 22  | 0.581 | 54 ± 72  | 0.912 | 91 ± 92   | 0.715 | 57 ± 61  | 0.017 | 47       |  | -7 ± 16  | 0.430 | 0.007  |
| 2035 | ctx-rh-insula               | iNPH | 4 ± 22  |       | 8 ± 17  |       | 62 ± 54  |       | 109 ± 78  |       | 135 ± 58 |       | 70 ± 75  |  | 8 ± 20   |       | <0.001 |
| 2010 | ctx-rh-isthmuscingulate     | REF  | 0 ± 7   | 0.583 | 1 ± 16  | 0.391 | 32 ± 48  | 0.871 | 57 ± 66   | 0.983 | 45 ± 50  | 0.013 | 80       |  | -6 ± 18  | 0.816 | 0.008  |
| 2010 | ctx-rh-isthmuscingulate     | iNPH | 4 ± 16  |       | 7 ± 11  |       | 33 ± 25  |       | 58 ± 43   |       | 107 ± 45 |       | 62 ± 68  |  | 5 ± 16   |       | <0.001 |
| 2011 | ctx-rh-lateraloccipital     | REF  | 1 ± 5   | 0.089 | -2 ± 12 | 0.358 | -2 ± 20  | 0.813 | 1 ± 15    | 0.964 | 17 ± 26  | 0.836 | 27       |  | -7 ± 17  | 0.142 | 0.151  |
| 2011 | ctx-rh-lateraloccipital     | iNPH | 5 ± 11  |       | 2 ± 8   |       | 3 ± 14   |       | 2 ± 13    |       | 20 ± 23  |       | 36 ± 25  |  | 8 ± 15   |       | <0.001 |
| 2012 | ctx-rh-lateralorbitofrontal | REF  | -4 ± 6  | 0.429 | 0 ± 16  | 0.455 | 51 ± 59  | 0.592 | 97 ± 72   | 0.656 | 67 ± 56  | 0.018 | 71       |  | -6 ± 16  | 0.705 | <0.001 |
| 2012 | ctx-rh-lateralorbitofrontal | iNPH | 4 ± 19  |       | 5 ± 13  |       | 42 ± 38  |       | 84 ± 63   |       | 134 ± 56 |       | 75 ± 79  |  | 5 ± 15   |       | <0.001 |
| 2013 | ctx-rh-lingual              | REF  | 2 ± 6   | 0.439 | 4 ± 18  | 0.706 | 17 ± 32  | 0.827 | 42 ± 56   | 0.882 | 44 ± 56  | 0.042 | 69       |  | -5 ± 17  | 0.859 | 0.091  |
| 2013 | ctx-rh-lingual              | iNPH | 6 ± 14  |       | 6 ± 11  |       | 19 ± 23  |       | 40 ± 48   |       | 101 ± 46 |       | 68 ± 70  |  | 7 ± 15   |       | <0.001 |
| 2014 | ctx-rh-medialorbitofrontal  | REF  | -3 ± 5  | 0.798 | 4 ± 17  | 0.482 | 63 ± 71  | 0.733 | 123 ± 89  | 0.853 | 79 ± 66  | 0.021 | 83       |  | -5 ± 16  | 0.610 | <0.001 |
| 2014 | ctx-rh-medialorbitofrontal  | iNPH | 3 ± 15  |       | 9 ± 12  |       | 80 ± 59  |       | 132 ± 83  |       | 151 ± 59 |       | 74 ± 71  |  | 4 ± 14   |       | <0.001 |
| 2015 | ctx-rh-midletemporal        | REF  | -8 ± 6  | 0.033 | -8 ± 13 | 0.161 | 6 ± 34   | 0.789 | 9 ± 38    | 0.427 | 42 ± 65  | 0.391 | 54       |  | -9 ± 17  | 0.487 | 0.003  |
| 2015 | ctx-rh-midletemporal        | iNPH | 9 ± 25  |       | 2 ± 19  |       | 5 ± 29   |       | 0 ± 25    |       | 67 ± 61  |       | 62 ± 49  |  | 7 ± 20   |       | <0.001 |
| 2017 | ctx-rh-paracentral          | REF  | -4 ± 6  | 0.128 | -7 ± 13 | 0.191 | 9 ± 37   | 0.653 | 13 ± 40   | 0.588 | 41 ± 45  | 0.333 | 33       |  | -6 ± 18  | 0.800 | <0.001 |
| 2017 | ctx-rh-paracentral          | iNPH | 3 ± 18  |       | 1 ± 12  |       | 3 ± 21   |       | 6 ± 20    |       | 63 ± 50  |       | 55 ± 44  |  | 1 ± 16   |       | <0.001 |
| 2016 | ctx-rh-parahippocampal      | REF  | -1 ± 8  | 0.724 | 21 ± 52 | 0.995 | 82 ± 100 | 0.844 | 104 ± 105 | 0.679 | 55 ± 54  | 0.077 | 40       |  | -8 ± 17  | 0.251 | 0.008  |
| 2016 | ctx-rh-parahippocampal      | iNPH | 13 ± 22 |       | 21 ± 26 |       | 94 ± 88  |       | 124 ± 75  |       | 125 ± 49 |       | 61 ± 73  |  | 7 ± 18   |       | <0.001 |
| 2018 | ctx-rh-parsopercularis      | REF  | -8 ± 7  | 0.274 | -6 ± 16 | 0.357 | 31 ± 69  | 0.562 | 44 ± 78   | 0.664 | 55 ± 66  | 0.027 | 66       |  | -8 ± 16  | 0.889 | 0.112  |
| 2018 | ctx-rh-parsopercularis      | iNPH | 6 ± 22  |       | 2 ± 17  |       | 17 ± 33  |       | 33 ± 39   |       | 120 ± 58 |       | 68 ± 68  |  | 5 ± 19   |       | <0.001 |
| 2019 | ctx-rh-parsorbitalis        | REF  | -6 ± 6  | 0.155 | -8 ± 12 | 0.138 | 24 ± 48  | 0.355 | 46 ± 59   | 0.159 | 70 ± 64  | 0.028 | 81       |  | -5 ± 18  | 0.971 | <0.001 |
| 2019 | ctx-rh-parsorbitalis        | iNPH | 5 ± 17  |       | 1 ± 14  |       | 7 ± 25   |       | 16 ± 25   |       | 135 ± 60 |       | 79 ± 83  |  | 4 ± 16   |       | <0.001 |
| 2020 | ctx-rh-parstriangularis     | REF  | -7 ± 6  | 0.263 | -7 ± 14 | 0.291 | 22 ± 51  | 0.501 | 41 ± 63   | 0.327 | 62 ± 64  | 0.039 | 74       |  | -7 ± 17  | 0.907 | 0.038  |
| 2020 | ctx-rh-parstriangularis     | iNPH | 5 ± 20  |       | 0 ± 16  |       | 10 ± 31  |       | 18 ± 33   |       | 123 ± 56 |       | 75 ± 80  |  | 4 ± 18   |       | <0.001 |
| 2021 | ctx-rh-pericalcarine        | REF  | 2 ± 5   | 0.436 | 0 ± 14  | 0.611 | 14 ± 41  | 0.693 | 26 ± 46   | 0.621 | 40 ± 51  | 0.059 | 82       |  | -6 ± 18  | 0.457 | 0.232  |
| 2021 | ctx-rh-pericalcarine        | iNPH | 3 ± 10  |       | 3 ± 9   |       | 11 ± 18  |       | 19 ± 22   |       | 89 ± 53  |       | 71 ± 66  |  | 8 ± 13   |       | <0.001 |
| 2022 | ctx-rh-postcentral          | REF  | -7 ± 7  | 0.153 | -6 ± 14 | 0.286 | 24 ± 64  | 0.432 | 35 ± 72   | 0.266 | 52 ± 70  | 0.223 | 66       |  | -8 ± 17  | 0.916 | 0.005  |
| 2022 | ctx-rh-postcentral          | iNPH | 7 ± 21  |       | 2 ± 16  |       | 6 ± 27   |       | 8 ± 24    |       | 88 ± 55  |       | 70 ± 52  |  | 4 ± 20   |       | <0.001 |
| 2023 | ctx-rh-posteriorcingulate   | REF  | -3 ± 7  | 0.135 | -5 ± 13 | 0.314 | 16 ± 41  | 0.519 | 29 ± 47   | 0.721 | 52 ± 53  | 0.083 | 62       |  | -4 ± 19  | 0.917 | <0.001 |
| 2023 | ctx-rh-posteriorcingulate   | iNPH | 5 ± 21  |       | 2 ± 15  |       | 7 ± 22   |       | 24 ± 34   |       | 96 ± 54  |       | 62 ± 57  |  | 3 ± 18   |       | <0.001 |
| 2024 | ctx-rh-precentral           | REF  | -7 ± 7  | 0.142 | -6 ± 14 | 0.251 | 18 ± 51  | 0.472 | 23 ± 61   | 0.271 | 46 ± 63  | 0.491 | 60       |  | -8 ± 16  | 0.908 | <0.001 |

|                                  |                                 |      |    |   |    |       |    |   |    |       |    |   |    |       |     |   |    |       |     |   |    |       |    |   |    |  |    |   |    |       |        |
|----------------------------------|---------------------------------|------|----|---|----|-------|----|---|----|-------|----|---|----|-------|-----|---|----|-------|-----|---|----|-------|----|---|----|--|----|---|----|-------|--------|
| 2024                             | ctx-rh-precentral               | iNPH | 6  | ± | 22 |       | 2  | ± | 16 |       | 5  | ± | 25 |       | 2   | ± | 20 |       | 64  | ± | 50 |       | 60 | ± | 43 |  | 2  | ± | 19 |       | <0.001 |
| 2025                             | ctx-rh-precuneus                | REF  | -2 | ± | 7  | 0.267 | -4 | ± | 13 | 0.232 | 10 | ± | 34 | 0.670 | 20  | ± | 38 | 0.380 | 45  | ± | 51 | 0.257 | 84 |   |    |  | -6 | ± | 18 | 0.483 | 0.014  |
| 2025                             | ctx-rh-precuneus                | iNPH | 3  | ± | 15 |       | 3  | ± | 10 |       | 6  | ± | 19 |       | 7   | ± | 20 |       | 74  | ± | 53 |       | 64 | ± | 57 |  | 5  | ± | 16 |       | <0.001 |
| 2026                             | ctx-rh-rostralanteriorcingulate | REF  | -5 | ± | 7  | 0.940 | 1  | ± | 17 | 0.485 | 60 | ± | 77 | 0.666 | 103 | ± | 92 | 0.545 | 67  | ± | 61 | 0.007 | 73 |   |    |  | -5 | ± | 16 | 0.498 | <0.001 |
| 2026                             | ctx-rh-rostralanteriorcingulate | iNPH | 2  | ± | 16 |       | 5  | ± | 12 |       | 76 | ± | 56 |       | 128 | ± | 72 |       | 149 | ± | 55 |       | 68 | ± | 66 |  | 5  | ± | 13 |       | <0.001 |
| 2027                             | ctx-rh-rostralmiddlefrontal     | REF  | -6 | ± | 7  | 0.269 | -7 | ± | 14 | 0.348 | 1  | ± | 21 | 0.780 | 2   | ± | 17 | 0.209 | 57  | ± | 53 | 0.507 | 91 |   |    |  | -3 | ± | 18 | 0.671 | <0.001 |
| 2027                             | ctx-rh-rostralmiddlefrontal     | iNPH | 2  | ± | 17 |       | -1 | ± | 13 |       | -2 | ± | 21 |       | -8  | ± | 17 |       | 74  | ± | 55 |       | 85 | ± | 73 |  | 3  | ± | 16 |       | <0.001 |
| 2028                             | ctx-rh-superiorfrontal          | REF  | -4 | ± | 7  | 0.325 | -5 | ± | 14 | 0.498 | 5  | ± | 25 | 0.629 | 11  | ± | 30 | 0.406 | 54  | ± | 55 | 0.292 | 68 |   |    |  | -3 | ± | 19 | 0.956 | <0.001 |
| 2028                             | ctx-rh-superiorfrontal          | iNPH | 2  | ± | 17 |       | -1 | ± | 12 |       | 1  | ± | 19 |       | 3   | ± | 17 |       | 80  | ± | 46 |       | 75 | ± | 50 |  | 2  | ± | 16 |       | <0.001 |
| 2029                             | ctx-rh-superiorparietal         | REF  | -3 | ± | 7  | 0.123 | -5 | ± | 14 | 0.108 | 5  | ± | 28 | 0.736 | 7   | ± | 32 | 0.413 | 38  | ± | 53 | 0.697 | 27 |   |    |  | -5 | ± | 19 | 0.598 | 0.007  |
| 2029                             | ctx-rh-superiorparietal         | iNPH | 5  | ± | 14 |       | 4  | ± | 9  |       | 3  | ± | 19 |       | -1  | ± | 15 |       | 28  | ± | 42 |       | 41 | ± | 5  |  | 4  | ± | 14 |       | <0.001 |
| 2030                             | ctx-rh-superiortemporal         | REF  | -7 | ± | 8  | 0.172 | -4 | ± | 16 | 0.350 | 34 | ± | 67 | 0.497 | 61  | ± | 82 | 0.318 | 57  | ± | 71 | 0.036 | 57 |   |    |  | -8 | ± | 16 | 0.851 | 0.144  |
| 2030                             | ctx-rh-superiortemporal         | iNPH | 8  | ± | 24 |       | 4  | ± | 19 |       | 21 | ± | 33 |       | 34  | ± | 32 |       | 122 | ± | 56 |       | 71 | ± | 67 |  | 7  | ± | 20 |       | <0.001 |
| 2031                             | ctx-rh-supramarginal            | REF  | -7 | ± | 7  | 0.162 | -6 | ± | 14 | 0.240 | 20 | ± | 53 | 0.509 | 32  | ± | 63 | 0.327 | 53  | ± | 72 | 0.109 | 73 |   |    |  | -9 | ± | 16 | 0.855 | 0.125  |
| 2031                             | ctx-rh-supramarginal            | iNPH | 8  | ± | 23 |       | 3  | ± | 17 |       | 9  | ± | 28 |       | 11  | ± | 30 |       | 102 | ± | 56 |       | 76 | ± | 66 |  | 5  | ± | 20 |       | <0.001 |
| 2033                             | ctx-rh-temporalpole             | REF  | -1 | ± | 8  | 0.581 | 1  | ± | 15 | 0.437 | 46 | ± | 52 | 0.805 | 92  | ± | 75 | 0.855 | 76  | ± | 63 | 0.021 | 63 |   |    |  | -5 | ± | 19 | 0.754 | 0.001  |
| 2033                             | ctx-rh-temporalpole             | iNPH | 3  | ± | 17 |       | 7  | ± | 15 |       | 46 | ± | 43 |       | 88  | ± | 60 |       | 144 | ± | 57 |       | 82 | ± | 79 |  | 2  | ± | 18 |       | <0.001 |
| 2034                             | ctx-rh-transversetemporal       | REF  | -5 | ± | 8  | 0.472 | 1  | ± | 20 | 0.614 | 47 | ± | 74 | 0.916 | 76  | ± | 87 | 0.971 | 43  | ± | 54 | 0.020 | 40 |   |    |  | -9 | ± | 17 | 0.676 | 0.026  |
| 2034                             | ctx-rh-transversetemporal       | iNPH | 9  | ± | 22 |       | 5  | ± | 17 |       | 54 | ± | 55 |       | 77  | ± | 54 |       | 105 | ± | 48 |       | 57 | ± | 58 |  | 7  | ± | 21 |       | <0.001 |
| <i>Some white matter regions</i> |                                 |      |    |   |    |       |    |   |    |       |    |   |    |       |     |   |    |       |     |   |    |       |    |   |    |  |    |   |    |       |        |
| 3002                             | wm-lh-caudalanteriorcingulate   | REF  | -3 | ± | 10 | 0.308 | -6 | ± | 14 | 0.489 | 0  | ± | 24 | 0.821 | -3  | ± | 14 | 0.424 | 12  | ± | 22 | 0.023 | 32 |   |    |  | -7 | ± | 18 | 0.541 | 0.005  |
| 3002                             | wm-lh-caudalanteriorcingulate   | iNPH | 2  | ± | 19 |       | -1 | ± | 14 |       | 5  | ± | 19 |       | 6   | ± | 19 |       | 41  | ± | 29 |       | 26 | ± | 27 |  | 1  | ± | 15 |       | <0.001 |
| 3003                             | wm-lh-caudalmiddlefrontal       | REF  | -3 | ± | 9  | 0.315 | -6 | ± | 15 | 0.487 | -1 | ± | 25 | 0.915 | -7  | ± | 12 | 0.629 | 6   | ± | 21 | 0.974 | 16 |   |    |  | -7 | ± | 19 | 0.553 | 0.029  |
| 3003                             | wm-lh-caudalmiddlefrontal       | iNPH | 3  | ± | 21 |       | -1 | ± | 15 |       | -1 | ± | 20 |       | -7  | ± | 14 |       | 7   | ± | 21 |       | 18 | ± | 6  |  | 1  | ± | 17 |       | <0.001 |
| 3005                             | wm-lh-cuneus                    | REF  | 0  | ± | 9  | 0.365 | -5 | ± | 13 | 0.377 | -2 | ± | 20 | 0.997 | 0   | ± | 15 | 0.730 | 21  | ± | 31 | 0.763 | 42 |   |    |  | -6 | ± | 19 | 0.246 | 0.091  |
| 3005                             | wm-lh-cuneus                    | iNPH | 3  | ± | 14 |       | 0  | ± | 10 |       | 1  | ± | 16 |       | -1  | ± | 13 |       | 26  | ± | 23 |       | 30 | ± | 24 |  | 4  | ± | 13 |       | <0.001 |
| 3006                             | wm-lh-entorhinal                | REF  | -2 | ± | 8  | 0.428 | -5 | ± | 14 | 0.580 | 2  | ± | 24 | 0.993 | 1   | ± | 17 | 0.646 | 27  | ± | 33 | 0.114 | 38 |   |    |  | -8 | ± | 19 | 0.594 | 0.016  |
| 3006                             | wm-lh-entorhinal                | iNPH | 2  | ± | 23 |       | -1 | ± | 16 |       | 5  | ± | 20 |       | 9   | ± | 22 |       | 54  | ± | 34 |       | 35 | ± | 32 |  | 2  | ± | 18 |       | <0.001 |
| 3032                             | wm-lh-frontalpole               | REF  | -2 | ± | 10 | 0.586 | -6 | ± | 14 | 0.618 | -5 | ± | 19 | 0.795 | -2  | ± | 8  | 0.599 | 39  | ± | 39 | 0.359 | 51 |   |    |  | -4 | ± | 19 | 0.431 | <0.001 |
| 3032                             | wm-lh-frontalpole               | iNPH | -1 | ± | 16 |       | -3 | ± | 12 |       | -5 | ± | 15 |       | -4  | ± | 14 |       | 56  | ± | 36 |       | 44 | ± | 28 |  | 2  | ± | 13 |       | <0.001 |
| 3007                             | wm-lh-fusiform                  | REF  | -1 | ± | 8  | 0.421 | -5 | ± | 14 | 0.568 | 0  | ± | 23 | 0.901 | -3  | ± | 17 | 0.848 | 11  | ± | 24 | 0.111 | 30 |   |    |  | -8 | ± | 18 | 0.386 | 0.016  |
| 3007                             | wm-lh-fusiform                  | iNPH | 2  | ± | 22 |       | -1 | ± | 16 |       | 4  | ± | 20 |       | 1   | ± | 16 |       | 31  | ± | 26 |       | 28 | ± | 22 |  | 3  | ± | 16 |       | <0.001 |
| 3008                             | wm-lh-inferiorparietal          | REF  | -2 | ± | 8  | 0.289 | -6 | ± | 14 | 0.321 | -2 | ± | 21 | 0.778 | -6  | ± | 12 | 0.891 | 7   | ± | 20 | 0.723 | 25 |   |    |  | -8 | ± | 19 | 0.306 | 0.025  |
| 3008                             | wm-lh-inferiorparietal          | iNPH | 3  | ± | 21 |       | 1  | ± | 15 |       | 4  | ± | 20 |       | -2  | ± | 14 |       | 11  | ± | 19 |       | 26 | ± | 17 |  | 4  | ± | 15 |       | <0.001 |
| 3009                             | wm-lh-inferiortemporal          | REF  | -3 | ± | 8  | 0.350 | -5 | ± | 14 | 0.639 | 1  | ± | 25 | 0.827 | -5  | ± | 15 | 0.617 | 10  | ± | 26 | 0.876 | 26 |   |    |  | -8 | ± | 18 | 0.500 | 0.008  |
| 3009                             | wm-lh-inferiortemporal          | iNPH | 1  | ± | 25 |       | -2 | ± | 18 |       | 1  | ± | 24 |       | -6  | ± | 16 |       | 13  | ± | 22 |       | 28 | ± | 17 |  | 2  | ± | 17 |       | <0.001 |
| 3035                             | wm-lh-insula                    | REF  | -2 | ± | 8  | 0.433 | -6 | ± | 14 | 0.547 | 1  | ± | 25 | 0.803 | -1  | ± | 17 | 0.837 | 13  | ± | 24 | 0.154 | 35 |   |    |  | -7 | ± | 18 | 0.569 | 0.038  |
| 3035                             | wm-lh-insula                    | iNPH | 2  | ± | 23 |       | -1 | ± | 16 |       | 1  | ± | 20 |       | -1  | ± | 16 |       | 32  | ± | 27 |       | 27 | ± | 25 |  | 1  | ± | 17 |       | <0.001 |



|      |                                |      |    |   |    |       |    |   |    |       |    |   |    |       |    |   |    |       |    |   |    |       |    |   |    |   |    |       |       |        |
|------|--------------------------------|------|----|---|----|-------|----|---|----|-------|----|---|----|-------|----|---|----|-------|----|---|----|-------|----|---|----|---|----|-------|-------|--------|
| 3010 | wm-lh-isthmuscingulate         | REF  | -2 | ± | 9  | 0.496 | -5 | ± | 14 | 0.361 | 1  | ± | 23 | 0.589 | 0  | ± | 19 | 0.309 | 12 | ± | 23 | 0.044 | 36 |   | -8 | ± | 18 | 0.378 | 0.026 |        |
| 3010 | wm-lh-isthmuscingulate         | iNPH | 2  | ± | 18 |       | 1  | ± | 13 |       | 9  | ± | 20 |       | 11 | ± | 19 |       | 38 | ± | 27 |       | 25 | ± | 27 | 4 | ±  | 16    |       | <0.001 |
| 3011 | wm-lh-lateraloccipital         | REF  | 1  | ± | 7  | 0.330 | -3 | ± | 13 | 0.516 | -3 | ± | 20 | 0.650 | -4 | ± | 11 | 0.936 | 8  | ± | 17 | 0.740 | 24 |   | -6 | ± | 19 | 0.236 | 0.020 |        |
| 3011 | wm-lh-lateraloccipital         | iNPH | 3  | ± | 16 |       | 0  | ± | 12 |       | 4  | ± | 16 |       | -1 | ± | 13 |       | 11 | ± | 17 |       | 26 | ± | 16 | 6 | ±  | 13    |       | <0.001 |
| 3012 | wm-lh-lateralorbitofrontal     | REF  | -2 | ± | 9  | 0.390 | -6 | ± | 14 | 0.490 | 0  | ± | 23 | 0.770 | 0  | ± | 15 | 0.636 | 21 | ± | 27 | 0.156 | 42 |   | -6 | ± | 19 | 0.571 | 0.004 |        |
| 3012 | wm-lh-lateralorbitofrontal     | iNPH | 2  | ± | 19 |       | -2 | ± | 13 |       | 0  | ± | 17 |       | -1 | ± | 14 |       | 41 | ± | 27 |       | 31 | ± | 27 | 0 | ±  | 15    |       | <0.001 |
| 3013 | wm-lh-lingual                  | REF  | 0  | ± | 8  | 0.457 | -4 | ± | 13 | 0.499 | 0  | ± | 21 | 0.547 | 0  | ± | 17 | 0.296 | 17 | ± | 27 | 0.082 | 34 |   | -7 | ± | 18 | 0.294 | 0.045 |        |
| 3013 | wm-lh-lingual                  | iNPH | 3  | ± | 17 |       | 0  | ± | 13 |       | 8  | ± | 16 |       | 11 | ± | 20 |       | 41 | ± | 29 |       | 29 | ± | 26 | 5 | ±  | 14    |       | <0.001 |
| 3014 | wm-lh-medialorbitofrontal      | REF  | -3 | ± | 8  | 0.462 | -6 | ± | 13 | 0.413 | 2  | ± | 22 | 0.890 | 6  | ± | 17 | 0.854 | 27 | ± | 31 | 0.142 | 46 |   | -6 | ± | 19 | 0.523 | 0.005 |        |
| 3014 | wm-lh-medialorbitofrontal      | iNPH | 2  | ± | 17 |       | -1 | ± | 13 |       | 3  | ± | 16 |       | 9  | ± | 20 |       | 50 | ± | 31 |       | 32 | ± | 29 | 1 | ±  | 15    |       | <0.001 |
| 3015 | wm-lh-middletemporal           | REF  | -3 | ± | 9  | 0.306 | -6 | ± | 15 | 0.609 | 0  | ± | 26 | 0.769 | -6 | ± | 16 | 0.507 | 14 | ± | 30 | 0.999 | 37 |   | -8 | ± | 18 | 0.514 | 0.017 |        |
| 3015 | wm-lh-middletemporal           | iNPH | 2  | ± | 26 |       | -2 | ± | 18 |       | 0  | ± | 22 |       | -8 | ± | 15 |       | 15 | ± | 26 |       | 28 | ± | 17 | 2 | ±  | 18    |       | <0.001 |
| 3017 | wm-lh-paracentral              | REF  | -3 | ± | 8  | 0.239 | -6 | ± | 14 | 0.360 | -1 | ± | 24 | 0.956 | -5 | ± | 13 | 0.633 | 11 | ± | 23 | 0.955 | 19 |   | -7 | ± | 19 | 0.577 | 0.023 |        |
| 3017 | wm-lh-paracentral              | iNPH | 3  | ± | 19 |       | 0  | ± | 13 |       | 1  | ± | 20 |       | -6 | ± | 13 |       | 12 | ± | 23 |       | 22 | ± | 16 | 1 | ±  | 16    |       | <0.001 |
| 3016 | wm-lh-parahippocampal          | REF  | -1 | ± | 10 | 0.591 | -4 | ± | 15 | 0.606 | 9  | ± | 29 | 0.875 | 14 | ± | 33 | 0.701 | 32 | ± | 36 | 0.148 | 34 |   | -8 | ± | 18 | 0.793 | 0.014 |        |
| 3016 | wm-lh-parahippocampal          | iNPH | 3  | ± | 23 |       | -1 | ± | 16 |       | 11 | ± | 20 |       | 23 | ± | 29 |       | 60 | ± | 34 |       | 29 | ± | 29 | 3 | ±  | 17    |       | <0.001 |
| 3018 | wm-lh-parsopercularis          | REF  | -3 | ± | 9  | 0.432 | -6 | ± | 15 | 0.595 | -1 | ± | 25 | 0.753 | -4 | ± | 14 | 0.477 | 17 | ± | 28 | 0.499 | 30 |   | -7 | ± | 19 | 0.570 | 0.012 |        |
| 3018 | wm-lh-parsopercularis          | iNPH | 2  | ± | 23 |       | -2 | ± | 17 |       | -2 | ± | 21 |       | -7 | ± | 14 |       | 27 | ± | 28 |       | 25 | ± | 16 | 1 | ±  | 17    |       | <0.001 |
| 3019 | wm-lh-parsorbitalis            | REF  | -2 | ± | 10 | 0.559 | -6 | ± | 15 | 0.724 | -1 | ± | 24 | 0.677 | -1 | ± | 15 | 0.334 | 31 | ± | 36 | 0.632 | 43 |   | -5 | ± | 20 | 0.737 | 0.006 |        |
| 3019 | wm-lh-parsorbitalis            | iNPH | -1 | ± | 20 |       | -4 | ± | 13 |       | -3 | ± | 20 |       | -5 | ± | 14 |       | 39 | ± | 32 |       | 37 | ± | 28 | 0 | ±  | 15    |       | <0.001 |
| 3020 | wm-lh-parstriangularis         | REF  | -2 | ± | 10 | 0.587 | -6 | ± | 15 | 0.679 | -2 | ± | 23 | 0.798 | -4 | ± | 12 | 0.556 | 16 | ± | 25 | 0.136 | 34 |   | -6 | ± | 19 | 0.564 | 0.003 |        |
| 3020 | wm-lh-parstriangularis         | iNPH | 0  | ± | 22 |       | -3 | ± | 15 |       | -2 | ± | 20 |       | -6 | ± | 14 |       | 35 | ± | 28 |       | 32 | ± | 25 | 0 | ±  | 17    |       | <0.001 |
| 3021 | wm-lh-pericalcarine            | REF  | 0  | ± | 8  | 0.420 | -4 | ± | 13 | 0.353 | -1 | ± | 20 | 0.370 | 0  | ± | 15 | 0.261 | 17 | ± | 27 | 0.089 | 39 |   | -6 | ± | 18 | 0.206 | 0.025 |        |
| 3021 | wm-lh-pericalcarine            | iNPH | 3  | ± | 13 |       | 2  | ± | 11 |       | 10 | ± | 14 |       | 10 | ± | 18 |       | 41 | ± | 30 |       | 38 | ± | 33 | 6 | ±  | 13    |       | <0.001 |
| 3022 | wm-lh-postcentral              | REF  | -4 | ± | 8  | 0.284 | -7 | ± | 15 | 0.368 | 0  | ± | 25 | 0.833 | -4 | ± | 16 | 0.498 | 18 | ± | 34 | 0.764 | 26 |   | -8 | ± | 19 | 0.477 | 0.023 |        |
| 3022 | wm-lh-postcentral              | iNPH | 3  | ± | 22 |       | -1 | ± | 16 |       | 0  | ± | 22 |       | -6 | ± | 15 |       | 23 | ± | 31 |       | 28 | ± | 15 | 2 | ±  | 18    |       | <0.001 |
| 3023 | wm-lh-posteriorcingulate       | REF  | -2 | ± | 9  | 0.291 | -6 | ± | 14 | 0.419 | 1  | ± | 25 | 0.794 | -3 | ± | 15 | 0.685 | 11 | ± | 21 | 0.067 | 28 |   | -8 | ± | 18 | 0.492 | 0.006 |        |
| 3023 | wm-lh-posteriorcingulate       | iNPH | 3  | ± | 19 |       | 0  | ± | 13 |       | 6  | ± | 21 |       | 3  | ± | 16 |       | 34 | ± | 28 |       | 26 | ± | 26 | 2 | ±  | 16    |       | <0.001 |
| 3024 | wm-lh-precentral               | REF  | -4 | ± | 8  | 0.291 | -7 | ± | 14 | 0.418 | -1 | ± | 25 | 0.918 | -6 | ± | 13 | 0.602 | 10 | ± | 24 | 0.980 | 19 |   | -8 | ± | 19 | 0.552 | 0.030 |        |
| 3024 | wm-lh-precentral               | iNPH | 3  | ± | 22 |       | -1 | ± | 16 |       | 0  | ± | 21 |       | -7 | ± | 15 |       | 11 | ± | 25 |       | 21 | ± | 9  | 1 | ±  | 17    |       | <0.001 |
| 3025 | wm-lh-precuneus                | REF  | -1 | ± | 8  | 0.311 | -5 | ± | 13 | 0.351 | -1 | ± | 22 | 0.891 | -3 | ± | 14 | 0.874 | 12 | ± | 23 | 0.317 | 38 |   | -7 | ± | 19 | 0.420 | 0.035 |        |
| 3025 | wm-lh-precuneus                | iNPH | 3  | ± | 17 |       | 0  | ± | 12 |       | 3  | ± | 19 |       | -2 | ± | 13 |       | 24 | ± | 24 |       | 28 | ± | 22 | 3 | ±  | 15    |       | <0.001 |
| 3026 | wm-lh-rostralanteriorcingulate | REF  | -3 | ± | 10 | 0.342 | -6 | ± | 14 | 0.344 | 0  | ± | 23 | 0.744 | 0  | ± | 16 | 0.183 | 17 | ± | 25 | 0.009 | 39 |   | -7 | ± | 19 | 0.547 | 0.004 |        |
| 3026 | wm-lh-rostralanteriorcingulate | iNPH | 2  | ± | 17 |       | 0  | ± | 13 |       | 6  | ± | 18 |       | 14 | ± | 20 |       | 52 | ± | 28 |       | 30 | ± | 27 | 1 | ±  | 15    |       | <0.001 |
| 3027 | wm-lh-rostralmiddlefrontal     | REF  | -2 | ± | 9  | 0.472 | -6 | ± | 14 | 0.643 | -2 | ± | 22 | 0.814 | -6 | ± | 11 | 0.361 | 10 | ± | 20 | 0.950 | 22 |   | -5 | ± | 20 | 0.662 | 0.005 |        |
| 3027 | wm-lh-rostralmiddlefrontal     | iNPH | 0  | ± | 20 |       | -3 | ± | 14 |       | -3 | ± | 18 |       | -9 | ± | 13 |       | 11 | ± | 21 |       | 28 | ± | 17 | 0 | ±  | 16    |       | <0.001 |
| 3028 | wm-lh-superiorfrontal          | REF  | -3 | ± | 9  | 0.310 | -6 | ± | 14 | 0.510 | -2 | ± | 23 | 0.818 | -5 | ± | 12 | 0.479 | 12 | ± | 23 | 0.906 | 25 |   | -6 | ± | 19 | 0.665 | 0.002 |        |
| 3028 | wm-lh-superiorfrontal          | iNPH | 2  | ± | 18 |       | -2 | ± | 13 |       | -2 | ± | 18 |       | -7 | ± | 13 |       | 14 | ± | 20 |       | 27 | ± | 15 | 0 | ±  | 16    |       | <0.001 |
| 3029 | wm-lh-superiorparietal         | REF  | -2 | ± | 9  | 0.301 | -6 | ± | 14 | 0.300 | -2 | ± | 22 | 0.939 | -5 | ± | 11 | 0.689 | 9  | ± | 23 | 0.960 | 23 |   | -7 | ± | 19 | 0.396 | 0.049 |        |
| 3029 | wm-lh-superiorparietal         | iNPH | 3  | ± | 18 |       | 1  | ± | 12 |       | 1  | ± | 19 |       | -5 | ± | 13 |       | 10 | ± | 20 |       | 23 | ± | 11 | 3 | ±  | 15    |       | <0.001 |

|      |                               |      |    |   |    |       |    |   |    |       |    |   |    |       |    |   |    |       |    |   |    |       |    |   |    |   |    |       |        |        |
|------|-------------------------------|------|----|---|----|-------|----|---|----|-------|----|---|----|-------|----|---|----|-------|----|---|----|-------|----|---|----|---|----|-------|--------|--------|
| 3030 | wm-lh-superiortemporal        | REF  | -3 | ± | 9  | 0.424 | -6 | ± | 15 | 0.576 | 1  | ± | 25 | 0.806 | -2 | ± | 18 | 0.746 | 18 | ± | 31 | 0.269 | 41 |   | -8 | ± | 19 | 0.562 | 0.026  |        |
| 3030 | wm-lh-superiortemporal        | iNPH | 2  | ± | 25 |       | -2 | ± | 18 |       | 1  | ± | 22 |       | -2 | ± | 17 |       | 36 | ± | 31 |       | 32 | ± | 27 | 2 | ±  | 18    |        | <0.001 |
| 3031 | wm-lh-supramarginal           | REF  | -3 | ± | 8  | 0.344 | -6 | ± | 14 | 0.443 | 0  | ± | 25 | 0.904 | -5 | ± | 14 | 0.648 | 14 | ± | 28 | 0.548 | 32 |   | -8 | ± | 19 | 0.483 | 0.037  |        |
| 3031 | wm-lh-supramarginal           | iNPH | 3  | ± | 24 |       | -1 | ± | 17 |       | 1  | ± | 22 |       | -6 | ± | 15 |       | 22 | ± | 26 |       | 35 | ± | 27 | 2 | ±  | 18    |        | <0.001 |
| 3033 | wm-lh-temporalpole            | REF  | -2 | ± | 8  | 0.580 | -5 | ± | 14 | 0.612 | 2  | ± | 23 | 0.657 | 6  | ± | 20 | 0.695 | 43 | ± | 45 | 0.368 | 53 |   | -7 | ± | 19 | 0.611 | 0.031  |        |
| 3033 | wm-lh-temporalpole            | iNPH | 2  | ± | 23 |       | -1 | ± | 16 |       | 1  | ± | 19 |       | 5  | ± | 20 |       | 63 | ± | 43 |       | 42 | ± | 44 | 2 | ±  | 18    |        | <0.001 |
| 3034 | wm-lh-transversetemporal      | REF  | -3 | ± | 9  | 0.455 | -6 | ± | 15 | 0.536 | 4  | ± | 28 | 0.721 | 6  | ± | 27 | 0.608 | 23 | ± | 34 | 0.236 | 37 |   | -8 | ± | 19 | 0.681 | 0.077  |        |
| 3034 | wm-lh-transversetemporal      | iNPH | 3  | ± | 25 |       | -1 | ± | 18 |       | 2  | ± | 22 |       | 3  | ± | 18 |       | 43 | ± | 30 |       | 29 | ± | 27 | 3 | ±  | 18    |        | <0.001 |
| 4002 | wm-rh-caudalanteriorcingulate | REF  | -3 | ± | 9  | 0.293 | -6 | ± | 14 | 0.440 | 0  | ± | 24 | 0.744 | -2 | ± | 15 | 0.339 | 13 | ± | 21 | 0.005 | 33 |   | -8 | ± | 18 | 0.469 | 0.003  |        |
| 4002 | wm-rh-caudalanteriorcingulate | iNPH | 2  | ± | 17 |       | -1 | ± | 12 |       | 5  | ± | 18 |       | 8  | ± | 20 |       | 46 | ± | 27 |       | 25 | ± | 30 | 1 | ±  | 14    |        | <0.001 |
| 4003 | wm-rh-caudalmiddlefrontal     | REF  | -4 | ± | 8  | 0.155 | -6 | ± | 14 | 0.329 | -1 | ± | 24 | 0.923 | -6 | ± | 13 | 0.560 | 6  | ± | 23 | 0.929 | 21 |   | -8 | ± | 18 | 0.585 | 0.046  |        |
| 4003 | wm-rh-caudalmiddlefrontal     | iNPH | 5  | ± | 19 |       | 0  | ± | 14 |       | 0  | ± | 21 |       | -8 | ± | 13 |       | 7  | ± | 21 |       | 18 | ± | 9  | 0 | ±  | 16    |        | <0.001 |
| 4005 | wm-rh-cuneus                  | REF  | 0  | ± | 9  | 0.295 | -5 | ± | 13 | 0.296 | -2 | ± | 20 | 0.997 | -1 | ± | 14 | 0.763 | 21 | ± | 33 | 0.721 | 40 |   | -6 | ± | 19 | 0.233 | 0.108  |        |
| 4005 | wm-rh-cuneus                  | iNPH | 3  | ± | 12 |       | 0  | ± | 9  |       | 2  | ± | 15 |       | -1 | ± | 13 |       | 26 | ± | 25 |       | 30 | ± | 26 | 4 | ±  | 13    |        | <0.001 |
| 4006 | wm-rh-entorhinal              | REF  | -3 | ± | 8  | 0.234 | -6 | ± | 13 | 0.363 | 2  | ± | 26 | 0.911 | 2  | ± | 19 | 0.714 | 27 | ± | 34 | 0.060 | 36 |   | -9 | ± | 17 | 0.536 | 0.003  |        |
| 4006 | wm-rh-entorhinal              | iNPH | 4  | ± | 18 |       | -1 | ± | 14 |       | 4  | ± | 20 |       | 7  | ± | 22 |       | 59 | ± | 34 |       | 33 | ± | 33 | 0 | ±  | 15    |        | <0.001 |
| 4032 | wm-rh-frontalpole             | REF  | -3 | ± | 8  | 0.413 | -7 | ± | 13 | 0.332 | -5 | ± | 17 | 0.965 | -3 | ± | 9  | 0.504 | 35 | ± | 32 | 0.184 | 61 |   | -4 | ± | 20 | 0.398 | <0.001 |        |
| 4032 | wm-rh-frontalpole             | iNPH | 0  | ± | 13 |       | -2 | ± | 9  |       | -4 | ± | 15 |       | -6 | ± | 11 |       | 57 | ± | 34 |       | 45 | ± | 37 | 2 | ±  | 12    |        | <0.001 |
| 4007 | wm-rh-fusiform                | REF  | -3 | ± | 8  | 0.180 | -6 | ± | 14 | 0.303 | 0  | ± | 25 | 0.845 | -2 | ± | 18 | 0.913 | 11 | ± | 25 | 0.061 | 25 |   | -9 | ± | 17 | 0.277 | 0.025  |        |
| 4007 | wm-rh-fusiform                | iNPH | 5  | ± | 18 |       | 1  | ± | 14 |       | 5  | ± | 19 |       | 0  | ± | 14 |       | 34 | ± | 26 |       | 26 | ± | 26 | 4 | ±  | 16    |        | <0.001 |
| 4008 | wm-rh-inferiorparietal        | REF  | -2 | ± | 9  | 0.115 | -7 | ± | 14 | 0.183 | -2 | ± | 23 | 0.814 | -6 | ± | 13 | 0.958 | 6  | ± | 21 | 0.511 | 13 |   | -8 | ± | 18 | 0.340 | 0.031  |        |
| 4008 | wm-rh-inferiorparietal        | iNPH | 6  | ± | 18 |       | 2  | ± | 13 |       | 4  | ± | 21 |       | -3 | ± | 13 |       | 12 | ± | 21 |       | 17 | ± | 9  | 3 | ±  | 16    |        | <0.001 |
| 4009 | wm-rh-inferiortemporal        | REF  | -4 | ± | 8  | 0.106 | -7 | ± | 14 | 0.287 | -1 | ± | 26 | 0.982 | -6 | ± | 16 | 0.734 | 8  | ± | 25 | 0.509 | 19 |   | -9 | ± | 18 | 0.319 | 0.004  |        |
| 4009 | wm-rh-inferiortemporal        | iNPH | 6  | ± | 20 |       | 1  | ± | 17 |       | 2  | ± | 22 |       | -6 | ± | 13 |       | 15 | ± | 22 |       | 24 | ± | 17 | 3 | ±  | 17    |        | <0.001 |
| 4035 | wm-rh-insula                  | REF  | -4 | ± | 8  | 0.220 | -7 | ± | 14 | 0.335 | 1  | ± | 26 | 0.922 | -2 | ± | 17 | 0.956 | 11 | ± | 24 | 0.070 | 30 |   | -8 | ± | 18 | 0.455 | 0.024  |        |
| 4035 | wm-rh-insula                  | iNPH | 4  | ± | 19 |       | 0  | ± | 15 |       | 2  | ± | 21 |       | 0  | ± | 16 |       | 35 | ± | 28 |       | 26 | ± | 26 | 2 | ±  | 17    |        | <0.001 |
| 4010 | wm-rh-isthmuscingulate        | REF  | -2 | ± | 9  | 0.465 | -5 | ± | 14 | 0.409 | 2  | ± | 24 | 0.747 | 1  | ± | 21 | 0.429 | 14 | ± | 24 | 0.062 | 31 |   | -7 | ± | 18 | 0.465 | 0.020  |        |
| 4010 | wm-rh-isthmuscingulate        | iNPH | 3  | ± | 16 |       | 0  | ± | 12 |       | 8  | ± | 19 |       | 10 | ± | 19 |       | 40 | ± | 27 |       | 24 | ± | 28 | 3 | ±  | 15    |        | <0.001 |
| 4011 | wm-rh-lateraloccipital        | REF  | 0  | ± | 7  | 0.163 | -5 | ± | 13 | 0.263 | -4 | ± | 21 | 0.678 | -5 | ± | 11 | 0.829 | 6  | ± | 18 | 0.718 | 15 |   | -7 | ± | 18 | 0.135 | 0.019  |        |
| 4011 | wm-rh-lateraloccipital        | iNPH | 5  | ± | 13 |       | 1  | ± | 11 |       | 3  | ± | 16 |       | -2 | ± | 12 |       | 9  | ± | 18 |       | 13 | ± | 8  | 6 | ±  | 13    |        | <0.001 |
| 4012 | wm-rh-lateralorbitofrontal    | REF  | -5 | ± | 8  | 0.177 | -7 | ± | 14 | 0.252 | 0  | ± | 23 | 0.931 | 0  | ± | 15 | 0.764 | 19 | ± | 25 | 0.064 | 43 |   | -8 | ± | 18 | 0.361 | 0.001  |        |
| 4012 | wm-rh-lateralorbitofrontal    | iNPH | 4  | ± | 17 |       | 0  | ± | 12 |       | 1  | ± | 19 |       | -1 | ± | 14 |       | 43 | ± | 28 |       | 33 | ± | 33 | 1 | ±  | 14    |        | <0.001 |
| 4013 | wm-rh-lingual                 | REF  | 0  | ± | 8  | 0.374 | -4 | ± | 13 | 0.394 | 1  | ± | 21 | 0.852 | 3  | ± | 21 | 0.798 | 19 | ± | 32 | 0.127 | 35 |   | -7 | ± | 18 | 0.259 | 0.108  |        |
| 4013 | wm-rh-lingual                 | iNPH | 4  | ± | 15 |       | 1  | ± | 12 |       | 6  | ± | 15 |       | 7  | ± | 15 |       | 42 | ± | 25 |       | 27 | ± | 26 | 5 | ±  | 13    |        | <0.001 |
| 4014 | wm-rh-medialorbitofrontal     | REF  | -4 | ± | 8  | 0.237 | -7 | ± | 13 | 0.289 | 1  | ± | 22 | 0.964 | 5  | ± | 16 | 0.829 | 26 | ± | 30 | 0.077 | 48 |   | -7 | ± | 18 | 0.424 | 0.006  |        |
| 4014 | wm-rh-medialorbitofrontal     | iNPH | 3  | ± | 15 |       | -1 | ± | 11 |       | 4  | ± | 16 |       | 8  | ± | 19 |       | 53 | ± | 30 |       | 34 | ± | 32 | 1 | ±  | 14    |        | <0.001 |
| 4015 | wm-rh-middletemporal          | REF  | -5 | ± | 9  | 0.089 | -7 | ± | 14 | 0.256 | -1 | ± | 27 | 0.969 | -7 | ± | 16 | 0.803 | 11 | ± | 30 | 0.733 | 19 |   | -9 | ± | 18 | 0.324 | 0.002  |        |
| 4015 | wm-rh-middletemporal          | iNPH | 7  | ± | 21 |       | 1  | ± | 16 |       | 2  | ± | 24 |       | -6 | ± | 13 |       | 16 | ± | 26 |       | 19 | ± | 11 | 4 | ±  | 18    |        | <0.001 |
| 4017 | wm-rh-paracentral             | REF  | -3 | ± | 8  | 0.228 | -7 | ± | 14 | 0.299 | -1 | ± | 23 | 0.973 | -6 | ± | 13 | 0.868 | 8  | ± | 20 | 0.543 | 17 |   | -7 | ± | 18 | 0.503 | 0.005  |        |

|                                     |                               |      |    |   |    |       |    |   |    |       |     |   |    |       |     |   |    |       |    |   |    |       |    |   |    |  |     |   |    |       |        |  |  |
|-------------------------------------|-------------------------------|------|----|---|----|-------|----|---|----|-------|-----|---|----|-------|-----|---|----|-------|----|---|----|-------|----|---|----|--|-----|---|----|-------|--------|--|--|
| 4017                                | wm-rh-paracentral             | iNPH | 3  | ± | 17 |       | 0  | ± | 13 |       | 1   | ± | 20 |       | -5  | ± | 13 |       | 15 | ± | 23 |       | 23 | ± | 18 |  | 1   | ± | 16 |       | <0.001 |  |  |
| 4016                                | wm-rh-parahippocampal         | REF  | -3 | ± | 9  | 0.426 | -5 | ± | 15 | 0.402 | 11  | ± | 31 | 0.892 | 15  | ± | 37 | 0.813 | 30 | ± | 37 | 0.116 | 26 |   |    |  | -9  | ± | 18 | 0.774 | 0.022  |  |  |
| 4016                                | wm-rh-parahippocampal         | iNPH | 5  | ± | 20 |       | 0  | ± | 15 |       | 11  | ± | 22 |       | 21  | ± | 25 |       | 60 | ± | 32 |       | 26 | ± | 30 |  | 3   | ± | 16 |       | <0.001 |  |  |
| 4018                                | wm-rh-parsopercularis         | REF  | -5 | ± | 8  | 0.178 | -7 | ± | 14 | 0.347 | 0   | ± | 25 | 0.834 | -5  | ± | 16 | 0.621 | 12 | ± | 27 | 0.207 | 34 |   |    |  | -9  | ± | 18 | 0.499 | 0.007  |  |  |
| 4018                                | wm-rh-parsopercularis         | iNPH | 5  | ± | 20 |       | 0  | ± | 15 |       | 0   | ± | 22 |       | -6  | ± | 14 |       | 29 | ± | 27 |       | 24 | ± | 19 |  | 1   | ± | 17 |       | <0.001 |  |  |
| 4019                                | wm-rh-parsorbitalis           | REF  | -4 | ± | 7  | 0.166 | -8 | ± | 13 | 0.248 | 0   | ± | 23 | 0.860 | -1  | ± | 15 | 0.352 | 26 | ± | 32 | 0.256 | 44 |   |    |  | -7  | ± | 18 | 0.538 | 0.003  |  |  |
| 4019                                | wm-rh-parsorbitalis           | iNPH | 4  | ± | 17 |       | -1 | ± | 12 |       | -1  | ± | 19 |       | -6  | ± | 12 |       | 43 | ± | 29 |       | 36 | ± | 32 |  | 1   | ± | 14 |       | <0.001 |  |  |
| 4020                                | wm-rh-parstriangularis        | REF  | -5 | ± | 7  | 0.172 | -8 | ± | 14 | 0.259 | 0   | ± | 24 | 0.889 | -4  | ± | 14 | 0.550 | 15 | ± | 27 | 0.127 | 37 |   |    |  | -8  | ± | 18 | 0.395 | 0.004  |  |  |
| 4020                                | wm-rh-parstriangularis        | iNPH | 4  | ± | 19 |       | 0  | ± | 15 |       | 0   | ± | 20 |       | -7  | ± | 13 |       | 36 | ± | 28 |       | 31 | ± | 32 |  | 1   | ± | 15 |       | <0.001 |  |  |
| 4021                                | wm-rh-pericalcarine           | REF  | -1 | ± | 8  | 0.365 | -5 | ± | 13 | 0.332 | -2  | ± | 20 | 0.725 | -1  | ± | 15 | 0.758 | 16 | ± | 26 | 0.159 | 40 |   |    |  | -7  | ± | 18 | 0.162 | 0.045  |  |  |
| 4021                                | wm-rh-pericalcarine           | iNPH | 2  | ± | 12 |       | 0  | ± | 9  |       | 5   | ± | 15 |       | 3   | ± | 15 |       | 35 | ± | 27 |       | 30 | ± | 27 |  | 5   | ± | 13 |       | <0.001 |  |  |
| 4022                                | wm-rh-postcentral             | REF  | -5 | ± | 8  | 0.157 | -7 | ± | 14 | 0.274 | 1   | ± | 26 | 0.749 | -2  | ± | 19 | 0.451 | 18 | ± | 35 | 0.764 | 27 |   |    |  | -8  | ± | 18 | 0.561 | 0.014  |  |  |
| 4022                                | wm-rh-postcentral             | iNPH | 5  | ± | 20 |       | 0  | ± | 15 |       | 0   | ± | 22 |       | -6  | ± | 14 |       | 23 | ± | 29 |       | 24 | ± | 13 |  | 1   | ± | 18 |       | <0.001 |  |  |
| 4023                                | wm-rh-posteriorcingulate      | REF  | -3 | ± | 9  | 0.301 | -6 | ± | 14 | 0.423 | 1   | ± | 24 | 0.881 | -3  | ± | 15 | 0.757 | 11 | ± | 22 | 0.063 | 27 |   |    |  | -8  | ± | 18 | 0.482 | 0.003  |  |  |
| 4023                                | wm-rh-posteriorcingulate      | iNPH | 3  | ± | 18 |       | -1 | ± | 12 |       | 5   | ± | 20 |       | 1   | ± | 15 |       | 34 | ± | 26 |       | 24 | ± | 25 |  | 1   | ± | 15 |       | <0.001 |  |  |
| 4024                                | wm-rh-precentral              | REF  | -4 | ± | 8  | 0.152 | -7 | ± | 14 | 0.269 | 0   | ± | 25 | 0.866 | -6  | ± | 14 | 0.594 | 9  | ± | 25 | 0.918 | 19 |   |    |  | -8  | ± | 18 | 0.546 | 0.017  |  |  |
| 4024                                | wm-rh-precentral              | iNPH | 5  | ± | 19 |       | 0  | ± | 14 |       | 0   | ± | 22 |       | -7  | ± | 14 |       | 11 | ± | 23 |       | 19 | ± | 10 |  | 0   | ± | 17 |       | <0.001 |  |  |
| 4025                                | wm-rh-precuneus               | REF  | -2 | ± | 9  | 0.280 | -6 | ± | 14 | 0.249 | -1  | ± | 22 | 0.907 | -3  | ± | 13 | 0.989 | 13 | ± | 24 | 0.204 | 33 |   |    |  | -7  | ± | 18 | 0.273 | 0.019  |  |  |
| 4025                                | wm-rh-precuneus               | iNPH | 3  | ± | 15 |       | 1  | ± | 11 |       | 3   | ± | 18 |       | -2  | ± | 13 |       | 29 | ± | 26 |       | 28 | ± | 22 |  | 3   | ± | 14 |       | <0.001 |  |  |
| 4026                                | wm-rh-rostralanterioringulate | REF  | -4 | ± | 9  | 0.278 | -7 | ± | 13 | 0.303 | -1  | ± | 23 | 0.741 | 0   | ± | 16 | 0.329 | 16 | ± | 21 | 0.003 | 44 |   |    |  | -7  | ± | 18 | 0.434 | 0.001  |  |  |
| 4026                                | wm-rh-rostralanterioringulate | iNPH | 3  | ± | 15 |       | -1 | ± | 12 |       | 4   | ± | 16 |       | 9   | ± | 18 |       | 52 | ± | 29 |       | 28 | ± | 30 |  | 0   | ± | 13 |       | <0.001 |  |  |
| 4027                                | wm-rh-rostralmiddlefrontal    | REF  | -4 | ± | 8  | 0.214 | -6 | ± | 14 | 0.387 | -2  | ± | 22 | 0.902 | -6  | ± | 11 | 0.424 | 9  | ± | 20 | 0.660 | 32 |   |    |  | -6  | ± | 19 | 0.511 | 0.002  |  |  |
| 4027                                | wm-rh-rostralmiddlefrontal    | iNPH | 3  | ± | 17 |       | -1 | ± | 13 |       | -1  | ± | 18 |       | -9  | ± | 12 |       | 14 | ± | 20 |       | 27 | ± | 21 |  | 1   | ± | 15 |       | <0.001 |  |  |
| 4028                                | wm-rh-superiorfrontal         | REF  | -4 | ± | 9  | 0.244 | -6 | ± | 14 | 0.409 | -3  | ± | 22 | 0.903 | -5  | ± | 12 | 0.576 | 10 | ± | 22 | 0.520 | 29 |   |    |  | -7  | ± | 18 | 0.562 | 0.008  |  |  |
| 4028                                | wm-rh-superiorfrontal         | iNPH | 3  | ± | 17 |       | -1 | ± | 13 |       | -2  | ± | 18 |       | -7  | ± | 13 |       | 17 | ± | 20 |       | 25 | ± | 15 |  | 0   | ± | 15 |       | <0.001 |  |  |
| 4029                                | wm-rh-superiorparietal        | REF  | -2 | ± | 9  | 0.207 | -6 | ± | 14 | 0.226 | -1  | ± | 22 | 0.989 | -5  | ± | 11 | 0.829 | 9  | ± | 23 | 0.887 | 16 |   |    |  | -7  | ± | 18 | 0.348 | 0.037  |  |  |
| 4029                                | wm-rh-superiorparietal        | iNPH | 4  | ± | 15 |       | 1  | ± | 11 |       | 1   | ± | 19 |       | -4  | ± | 13 |       | 8  | ± | 19 |       | 18 | ± | 8  |  | 3   | ± | 15 |       | <0.001 |  |  |
| 4030                                | wm-rh-superiortemporal        | REF  | -5 | ± | 9  | 0.150 | -7 | ± | 14 | 0.299 | 1   | ± | 27 | 0.876 | -1  | ± | 20 | 0.631 | 20 | ± | 35 | 0.191 | 28 |   |    |  | -9  | ± | 18 | 0.437 | 0.004  |  |  |
| 4030                                | wm-rh-superiortemporal        | iNPH | 6  | ± | 21 |       | 0  | ± | 16 |       | 2   | ± | 23 |       | -3  | ± | 15 |       | 41 | ± | 31 |       | 28 | ± | 25 |  | 3   | ± | 18 |       | <0.001 |  |  |
| 4031                                | wm-rh-supramarginal           | REF  | -4 | ± | 9  | 0.160 | -7 | ± | 14 | 0.288 | 0   | ± | 26 | 0.895 | -5  | ± | 16 | 0.669 | 13 | ± | 29 | 0.401 | 25 |   |    |  | -8  | ± | 18 | 0.483 | 0.011  |  |  |
| 4031                                | wm-rh-supramarginal           | iNPH | 6  | ± | 20 |       | 1  | ± | 16 |       | 1   | ± | 22 |       | -5  | ± | 13 |       | 24 | ± | 26 |       | 28 | ± | 21 |  | 2   | ± | 18 |       | <0.001 |  |  |
| 4033                                | wm-rh-temporalpole            | REF  | -4 | ± | 8  | 0.233 | -7 | ± | 13 | 0.294 | 3   | ± | 26 | 0.625 | 4   | ± | 17 | 0.742 | 38 | ± | 38 | 0.184 | 49 |   |    |  | -8  | ± | 19 | 0.500 | <0.001 |  |  |
| 4033                                | wm-rh-temporalpole            | iNPH | 3  | ± | 17 |       | 0  | ± | 13 |       | -1  | ± | 18 |       | 3   | ± | 18 |       | 62 | ± | 35 |       | 42 | ± | 37 |  | 1   | ± | 15 |       | <0.001 |  |  |
| 4034                                | wm-rh-transversetemporal      | REF  | -4 | ± | 10 | 0.192 | -7 | ± | 15 | 0.315 | 4   | ± | 31 | 0.792 | 6   | ± | 27 | 0.622 | 22 | ± | 36 | 0.133 | 26 |   |    |  | -9  | ± | 18 | 0.533 | 0.022  |  |  |
| 4034                                | wm-rh-transversetemporal      | iNPH | 7  | ± | 21 |       | 1  | ± | 16 |       | 3   | ± | 23 |       | 3   | ± | 18 |       | 46 | ± | 31 |       | 24 | ± | 22 |  | 3   | ± | 19 |       | <0.001 |  |  |
| <b>Other selected brain regions</b> |                               |      |    |   |    |       |    |   |    |       |     |   |    |       |     |   |    |       |    |   |    |       |    |   |    |  |     |   |    |       |        |  |  |
| 85                                  | Optic-Chiasm                  | REF  | -1 | ± | 14 | 0.968 | 22 | ± | 34 | 0.471 | 85  | ± | 79 | 0.384 | 90  | ± | 79 | 0.150 | 33 | ± | 40 | 0.039 | 39 |   |    |  | -15 | ± | 19 | 0.528 | <0.001 |  |  |
| 85                                  | Optic-Chiasm                  | iNPH | 8  | ± | 18 |       | 33 | ± | 28 |       | 120 | ± | 87 |       | 142 | ± | 66 |       | 96 | ± | 49 |       | 41 | ± | 51 |  | 2   | ± | 15 |       | <0.001 |  |  |

|        |                  |      |    |   |    |       |    |   |    |       |    |   |    |       |    |   |    |       |     |   |    |        |    |   |    |   |    |       |        |        |
|--------|------------------|------|----|---|----|-------|----|---|----|-------|----|---|----|-------|----|---|----|-------|-----|---|----|--------|----|---|----|---|----|-------|--------|--------|
| 16     | Brain-Stem       | REF  | 0  | ± | 8  | 0.528 | -2 | ± | 14 | 0.506 | 11 | ± | 27 | 0.919 | 12 | ± | 26 | 0.923 | 17  | ± | 23 | 0.402  | 28 |   | -8 | ± | 18 | 0.668 | 0.009  |        |
| 16     | Brain-Stem       | iNPH | 4  | ± | 19 |       | 3  | ± | 15 |       | 13 | ± | 21 |       | 13 | ± | 19 |       | 29  | ± | 24 |        | 17 | ± | 20 | 3 | ±  | 16    |        | <0.001 |
| 255    | CC_Anterior      | REF  | -2 | ± | 9  | 0.459 | -5 | ± | 14 | 0.426 | 6  | ± | 26 | 0.628 | 7  | ± | 21 | 0.100 | 13  | ± | 22 | 0.001  | 33 |   | -7 | ± | 18 | 0.676 | 0.002  |        |
| 255    | CC_Anterior      | iNPH | 2  | ± | 17 |       | 0  | ± | 13 |       | 14 | ± | 21 |       | 28 | ± | 28 |       | 54  | ± | 28 |        | 23 | ± | 28 | 0 | ±  | 14    |        | <0.001 |
| 253    | CC_Central       | REF  | -2 | ± | 9  | 0.926 | -5 | ± | 15 | 0.541 | 9  | ± | 30 | 0.211 | 9  | ± | 32 | 0.051 | 12  | ± | 21 | 0.001  | 26 |   | -9 | ± | 17 | 0.925 | 0.001  |        |
| 253    | CC_Central       | iNPH | 0  | ± | 20 |       | 0  | ± | 14 |       | 29 | ± | 29 |       | 46 | ± | 41 |       | 70  | ± | 45 |        | 31 | ± | 38 | 1 | ±  | 15    |        | <0.001 |
| 254    | CC_Mid_Anterior  | REF  | -2 | ± | 9  | 0.536 | -5 | ± | 15 | 0.390 | 6  | ± | 27 | 0.246 | 6  | ± | 25 | 0.066 | 11  | ± | 22 | 0.001  | 29 |   | -8 | ± | 18 | 0.800 | 0.002  |        |
| 254    | CC_Mid_Anterior  | iNPH | 2  | ± | 19 |       | 1  | ± | 14 |       | 25 | ± | 33 |       | 38 | ± | 41 |       | 66  | ± | 41 |        | 38 | ± | 47 | 3 | ±  | 16    |        | <0.001 |
| 252    | CC_Mid_Posterior | REF  | -2 | ± | 10 | 0.913 | -1 | ± | 21 | 0.844 | 24 | ± | 46 | 0.792 | 27 | ± | 54 | 0.850 | 15  | ± | 25 | 0.038  | 43 |   | -9 | ± | 18 | 0.639 | 0.002  |        |
| 252    | CC_Mid_Posterior | iNPH | 2  | ± | 20 |       | 1  | ± | 15 |       | 20 | ± | 24 |       | 34 | ± | 31 |       | 60  | ± | 35 |        | 25 | ± | 29 | 3 | ±  | 15    |        | <0.001 |
| 251    | CC_Posterior     | REF  | -1 | ± | 10 | 0.526 | -5 | ± | 14 | 0.363 | 6  | ± | 25 | 0.411 | 8  | ± | 24 | 0.215 | 17  | ± | 25 | 0.009  | 35 |   | -8 | ± | 19 | 0.499 | 0.013  |        |
| 251    | CC_Posterior     | iNPH | 2  | ± | 19 |       | 1  | ± | 13 |       | 18 | ± | 26 |       | 28 | ± | 34 |       | 61  | ± | 42 |        | 36 | ± | 45 | 3 | ±  | 16    |        | <0.001 |
| 13, 52 | Pallidum         | REF  | -2 | ± | 8  | 0.277 | -6 | ± | 14 | 0.483 | 0  | ± | 25 | 0.805 | -6 | ± | 13 | 0.701 | 2   | ± | 17 | 0.910  | 16 |   | -8 | ± | 18 | 0.460 | 0.017  |        |
| 13, 52 | Pallidum         | iNPH | 3  | ± | 20 |       | -1 | ± | 15 |       | 0  | ± | 20 |       | -6 | ± | 13 |       | 3   | ± | 19 |        | 6  | ± | 10 | 1 | ±  | 16    |        | <0.001 |
| 12, 51 | Putamen          | REF  | -4 | ± | 8  | 0.202 | -6 | ± | 14 | 0.395 | 0  | ± | 25 | 0.842 | -6 | ± | 13 | 0.683 | 7   | ± | 19 | 0.439  | 34 |   | -8 | ± | 17 | 0.359 | 0.007  |        |
| 12, 51 | Putamen          | iNPH | 4  | ± | 21 |       | 0  | ± | 15 |       | 0  | ± | 20 |       | -6 | ± | 13 |       | 14  | ± | 20 |        | 19 | ± | 18 | 2 | ±  | 16    |        | <0.001 |
| 10, 49 | Thalamus-Proper  | REF  | -2 | ± | 8  | 0.292 | -4 | ± | 15 | 0.341 | 5  | ± | 26 | 0.853 | 2  | ± | 18 | 0.540 | 11  | ± | 21 | 0.075  | 24 |   | -8 | ± | 18 | 0.473 | 0.008  |        |
| 10, 49 | Thalamus-Proper  | iNPH | 5  | ± | 21 |       | 2  | ± | 16 |       | 10 | ± | 22 |       | 10 | ± | 17 |       | 33  | ± | 27 |        | 20 | ± | 24 | 3 | ±  | 17    |        | <0.001 |
| 11, 50 | Caudate          | REF  | -4 | ± | 8  | 0.351 | -6 | ± | 14 | 0.305 | 2  | ± | 27 | 0.401 | -1 | ± | 19 | 0.022 | 5   | ± | 19 | <0.001 | 46 |   | -8 | ± | 17 | 0.407 | 0.005  |        |
| 11, 50 | Caudate          | iNPH | 4  | ± | 20 |       | 1  | ± | 15 |       | 13 | ± | 21 |       | 28 | ± | 29 |       | 62  | ± | 42 |        | 41 | ± | 46 | 2 | ±  | 17    |        | <0.001 |
| 26, 58 | Accumbens-area   | REF  | -4 | ± | 8  | 0.278 | -6 | ± | 14 | 0.233 | 5  | ± | 26 | 0.454 | 11 | ± | 22 | 0.207 | 31  | ± | 31 | 0.012  | 44 |   | -8 | ± | 17 | 0.385 | <0.001 |        |
| 26, 58 | Accumbens-area   | iNPH | 5  | ± | 19 |       | 2  | ± | 14 |       | 16 | ± | 21 |       | 27 | ± | 26 |       | 74  | ± | 38 |        | 41 | ± | 41 | 4 | ±  | 16    |        | <0.001 |
| 18, 54 | Amygdala         | REF  | -3 | ± | 7  | 0.359 | -3 | ± | 14 | 0.356 | 14 | ± | 28 | 0.861 | 21 | ± | 28 | 0.532 | 37  | ± | 37 | 0.050  | 34 |   | -8 | ± | 17 | 0.747 | 0.004  |        |
| 18, 54 | Amygdala         | iNPH | 5  | ± | 23 |       | 3  | ± | 16 |       | 19 | ± | 25 |       | 33 | ± | 35 |       | 76  | ± | 41 |        | 46 | ± | 49 | 4 | ±  | 16    |        | <0.001 |
| 17, 53 | Hippocampus      | REF  | -1 | ± | 7  | 0.799 | 2  | ± | 17 | 0.283 | 35 | ± | 45 | 0.246 | 48 | ± | 55 | 0.188 | 39  | ± | 39 | 0.008  | 31 |   | -8 | ± | 17 | 0.757 | 0.005  |        |
| 17, 53 | Hippocampus      | iNPH | 5  | ± | 23 |       | 10 | ± | 18 |       | 65 | ± | 54 |       | 87 | ± | 62 |       | 100 | ± | 45 |        | 47 | ± | 52 | 5 | ±  | 17    |        | <0.001 |

**CSF regions**

|       |                   |      |     |   |      |       |      |   |      |       |      |   |      |       |      |   |      |        |      |   |      |        |     |   |      |    |    |       |        |        |
|-------|-------------------|------|-----|---|------|-------|------|---|------|-------|------|---|------|-------|------|---|------|--------|------|---|------|--------|-----|---|------|----|----|-------|--------|--------|
| 24    | CSF               | ref  | 16  | ± | 20   | 0.404 | 101  | ± | 116  | 0.883 | 354  | ± | 309  | 0.511 | 500  | ± | 421  | 0.152  | 157  | ± | 164  | <0.001 | 177 |   | -8   | ±  | 17 | 0.433 | <0.001 |        |
| 24    | CSF               | inph | 23  | ± | 29   |       | 94   | ± | 80   |       | 448  | ± | 346  |       | 755  | ± | 323  |        | 719  | ± | 363  |        | 256 | ± | 304  | 2  | ±  | 16    |        | <0.001 |
| 14    | 3rd-Ventricle     | ref  | 5   | ± | 13   | 0.744 | 332  | ± | 823  | 0.386 | 493  | ± | 915  | 0.019 | 467  | ± | 898  | 0.007  | 146  | ± | 221  | 0.025  | 183 |   | -10  | ±  | 16 | 0.418 | 0.011  |        |
| 14    | 3rd-Ventricle     | inph | 96  | ± | 73   |       | 642  | ± | 688  |       | 1648 | ± | 1199 |       | 1647 | ± | 909  |        | 1156 | ± | 592  |        | 493 | ± | 576  | 1  | ±  | 21    |        | <0.001 |
| 15    | 4th-Ventricle     | ref  | 359 | ± | 457  | 0.971 | 883  | ± | 1347 | 0.290 | 1056 | ± | 1285 | 0.006 | 936  | ± | 1167 | 0.003  | 266  | ± | 295  | 0.080  | 215 |   | -5   | ±  | 24 | 0.166 | 0.009  |        |
| 15    | 4th-Ventricle     | inph | 676 | ± | 1236 |       | 1520 | ± | 1202 |       | 2794 | ± | 1347 |       | 2430 | ± | 842  |        | 1234 | ± | 494  |        | 502 | ± | 589  | 0  | ±  | 15    |        | <0.001 |
| 5, 44 | Inf-Lat-Vent      | ref  | -3  | ± | 6    | 0.575 | 39   | ± | 122  | 0.319 | 74   | ± | 159  | 0.002 | 66   | ± | 168  | <0.001 | 26   | ± | 54   | <0.001 | 13  |   | -14  | ±  | 17 | 0.350 | <0.001 |        |
| 5, 44 | Inf-Lat-Vent      | inph | 8   | ± | 32   |       | 92   | ± | 103  |       | 880  | ± | 760  |       | 1157 | ± | 747  |        | 1025 | ± | 591  |        | 394 | ± | 502  | 1  | ±  | 19    |        | <0.001 |
| 4, 43 | Lateral-Ventricle | ref  | -10 | ± | 8    | 0.428 | 342  | ± | 957  | 0.895 | 641  | ± | 1415 | 0.023 | 656  | ± | 1438 | 0.002  | 173  | ± | 325  | 0.001  | 228 |   | -10  | ±  | 12 | 0.339 | 0.052  |        |
| 4, 43 | Lateral-Ventricle | inph | 11  | ± | 28   |       | 296  | ± | 350  |       | 2598 | ± | 2179 |       | 3041 | ± | 1808 |        | 2272 | ± | 1217 |        | 869 | ± | 1104 | -7 | ±  | 19    |        | <0.001 |

Data presented as mean ± standard deviation. \*Sign.: Significant differences over time was determined by by a linear mixed model for repeated measurements SegID – FreeSurfer segmentation identity; Ctx - Cortex; lh – left hemisphere; rh – right hemisphere; wm – white matter; CC – corpus callosum; CSF – cerebrospinal fluid.

**Table S5.** Differences in normalized T1 signals in various brain regions before and 4 weeks after intrathecal gadobutrol in REF and iNPH individuals

| SegID                                    | StructName                      | REF group |           |       | *Sign     | iNPH group |         |       | p *Sign | Pre: REF vs. iNPH<br>*Sign | 4 weeks: REF vs. iNPH<br>*Sign |
|------------------------------------------|---------------------------------|-----------|-----------|-------|-----------|------------|---------|-------|---------|----------------------------|--------------------------------|
|                                          |                                 | Pre       | 4 weeks   |       |           | Pre        | 4 weeks |       |         |                            |                                |
| <i>Some cortical grey matter regions</i> |                                 |           |           |       |           |            |         |       |         |                            |                                |
| 1002                                     | ctx-lh-caudalanteriorcingulate  | 1.5 ± 0.3 | 1.4 ± 0.2 | 0.502 | 1.4 ± 0.3 | 1.4 ± 0.2  | 0.751   | 0.582 | 0.970   |                            |                                |
| 1003                                     | ctx-lh-caudalmiddlefrontal      | 1.3 ± 0.3 | 1.2 ± 0.2 | 0.319 | 1.4 ± 0.3 | 1.4 ± 0.2  | 0.993   | 0.463 | 0.130   |                            |                                |
| 1005                                     | ctx-lh-cuneus                   | 1.8 ± 0.4 | 1.7 ± 0.3 | 0.441 | 1.5 ± 0.3 | 1.6 ± 0.2  | 0.350   | 0.110 | 0.295   |                            |                                |
| 1006                                     | ctx-lh-entorhinal               | 1.6 ± 0.3 | 1.5 ± 0.2 | 0.261 | 1.5 ± 0.4 | 1.4 ± 0.1  | 0.978   | 0.539 | 0.873   |                            |                                |
| 1032                                     | ctx-lh-frontalpole              | 1 ± 0.2   | 1 ± 0.2   | 0.772 | 1.1 ± 0.3 | 1.1 ± 0.1  | 0.653   | 0.503 | 0.375   |                            |                                |
| 1007                                     | ctx-lh-fusiform                 | 1.6 ± 0.3 | 1.5 ± 0.3 | 0.285 | 1.5 ± 0.4 | 1.5 ± 0.1  | 0.902   | 0.565 | 0.992   |                            |                                |
| 1008                                     | ctx-lh-inferiorparietal         | 1.4 ± 0.3 | 1.3 ± 0.2 | 0.262 | 1.4 ± 0.3 | 1.4 ± 0.2  | 0.603   | 0.712 | 0.428   |                            |                                |
| 1009                                     | ctx-lh-inferiortemporal         | 1.4 ± 0.3 | 1.3 ± 0.3 | 0.236 | 1.3 ± 0.4 | 1.3 ± 0.1  | 0.993   | 0.785 | 0.729   |                            |                                |
| 1035                                     | ctx-lh-insula                   | 1.5 ± 0.3 | 1.4 ± 0.3 | 0.348 | 1.4 ± 0.3 | 1.4 ± 0.2  | 0.971   | 0.433 | 0.769   |                            |                                |
| 1010                                     | ctx-lh-isthmuscingulate         | 2.1 ± 0.4 | 1.9 ± 0.3 | 0.284 | 1.8 ± 0.4 | 1.8 ± 0.2  | 0.639   | 0.162 | 0.480   |                            |                                |
| 1011                                     | ctx-lh-lateraloccipital         | 1.5 ± 0.3 | 1.4 ± 0.2 | 0.481 | 1.4 ± 0.3 | 1.4 ± 0.2  | 0.160   | 0.349 | 0.884   |                            |                                |
| 1012                                     | ctx-lh-lateralorbitofrontal     | 1.3 ± 0.3 | 1.2 ± 0.2 | 0.298 | 1.3 ± 0.3 | 1.2 ± 0.1  | 0.795   | 0.630 | 0.935   |                            |                                |
| 1013                                     | ctx-lh-lingual                  | 1.9 ± 0.4 | 1.8 ± 0.3 | 0.485 | 1.6 ± 0.4 | 1.7 ± 0.2  | 0.345   | 0.243 | 0.462   |                            |                                |
| 1014                                     | ctx-lh-medialorbitofrontal      | 1.3 ± 0.3 | 1.2 ± 0.2 | 0.391 | 1.3 ± 0.3 | 1.3 ± 0.2  | 0.753   | 0.760 | 0.873   |                            |                                |
| 1015                                     | ctx-lh-middletemporal           | 1.3 ± 0.3 | 1.2 ± 0.3 | 0.235 | 1.3 ± 0.4 | 1.3 ± 0.2  | 0.968   | 0.842 | 0.633   |                            |                                |
| 1017                                     | ctx-lh-paracentral              | 1.7 ± 0.3 | 1.6 ± 0.3 | 0.311 | 1.6 ± 0.3 | 1.6 ± 0.2  | 0.825   | 0.558 | 0.675   |                            |                                |
| 1016                                     | ctx-lh-parahippocampal          | 1.8 ± 0.4 | 1.7 ± 0.3 | 0.299 | 1.7 ± 0.4 | 1.7 ± 0.2  | 0.853   | 0.457 | 0.727   |                            |                                |
| 1018                                     | ctx-lh-parsopercularis          | 1.4 ± 0.3 | 1.3 ± 0.2 | 0.310 | 1.3 ± 0.3 | 1.3 ± 0.2  | 0.964   | 0.845 | 0.596   |                            |                                |
| 1019                                     | ctx-lh-parsorbitalis            | 1.1 ± 0.2 | 1 ± 0.2   | 0.407 | 1.2 ± 0.3 | 1.1 ± 0.2  | 0.867   | 0.777 | 0.315   |                            |                                |
| 1020                                     | ctx-lh-parstriangularis         | 1.2 ± 0.3 | 1.2 ± 0.2 | 0.355 | 1.3 ± 0.3 | 1.3 ± 0.1  | 0.904   | 0.770 | 0.285   |                            |                                |
| 1021                                     | ctx-lh-pericalcarine            | 1.9 ± 0.4 | 1.8 ± 0.3 | 0.470 | 1.6 ± 0.3 | 1.7 ± 0.2  | 0.199   | 0.070 | 0.166   |                            |                                |
| 1022                                     | ctx-lh-postcentral              | 1.4 ± 0.3 | 1.3 ± 0.3 | 0.244 | 1.5 ± 0.3 | 1.5 ± 0.2  | 0.929   | 0.868 | 0.246   |                            |                                |
| 1023                                     | ctx-lh-posteriorcingulate       | 1.7 ± 0.3 | 1.6 ± 0.3 | 0.265 | 1.5 ± 0.3 | 1.5 ± 0.2  | 0.931   | 0.246 | 0.727   |                            |                                |
| 1024                                     | ctx-lh-precentral               | 1.5 ± 0.3 | 1.4 ± 0.3 | 0.294 | 1.5 ± 0.4 | 1.5 ± 0.2  | 0.947   | 0.834 | 0.320   |                            |                                |
| 1025                                     | ctx-lh-precuneus                | 1.7 ± 0.3 | 1.6 ± 0.2 | 0.332 | 1.6 ± 0.3 | 1.6 ± 0.2  | 0.678   | 0.215 | 0.714   |                            |                                |
| 1026                                     | ctx-lh-rostralanteriorcingulate | 1.4 ± 0.3 | 1.3 ± 0.2 | 0.375 | 1.3 ± 0.3 | 1.3 ± 0.2  | 0.657   | 0.552 | 0.909   |                            |                                |
| 1027                                     | ctx-lh-rostralmiddlefrontal     | 1.1 ± 0.2 | 1.1 ± 0.2 | 0.446 | 1.2 ± 0.3 | 1.2 ± 0.2  | 0.975   | 0.511 | 0.192   |                            |                                |
| 1028                                     | ctx-lh-superiorfrontal          | 1.2 ± 0.2 | 1.2 ± 0.2 | 0.449 | 1.3 ± 0.3 | 1.4 ± 0.2  | 0.851   | 0.446 | 0.151   |                            |                                |
| 1029                                     | ctx-lh-superiorparietal         | 1.4 ± 0.3 | 1.3 ± 0.2 | 0.314 | 1.4 ± 0.3 | 1.5 ± 0.2  | 0.560   | 0.940 | 0.218   |                            |                                |
| 1030                                     | ctx-lh-superiortemporal         | 1.4 ± 0.3 | 1.3 ± 0.3 | 0.288 | 1.4 ± 0.4 | 1.3 ± 0.2  | 0.834   | 0.855 | 0.715   |                            |                                |
| 1031                                     | ctx-lh-supramarginal            | 1.4 ± 0.3 | 1.3 ± 0.2 | 0.193 | 1.4 ± 0.4 | 1.4 ± 0.2  | 0.989   | 0.960 | 0.258   |                            |                                |

|      |                                 |     |       |     |       |       |     |       |     |       |       |       |       |
|------|---------------------------------|-----|-------|-----|-------|-------|-----|-------|-----|-------|-------|-------|-------|
| 1033 | ctx-lh-temporalpole             | 1.3 | ± 0.3 | 1.2 | ± 0.2 | 0.241 | 1.2 | ± 0.4 | 1.2 | ± 0.1 | 0.801 | 0.758 | 0.617 |
| 1034 | ctx-lh-transversetemporal       | 1.9 | ± 0.4 | 1.7 | ± 0.3 | 0.205 | 1.8 | ± 0.5 | 1.8 | ± 0.2 | 0.944 | 0.803 | 0.470 |
| 2002 | ctx-rh-caudalanteriorcingulate  | 1.5 | ± 0.3 | 1.4 | ± 0.3 | 0.437 | 1.3 | ± 0.3 | 1.4 | ± 0.2 | 0.847 | 0.417 | 0.727 |
| 2003 | ctx-rh-caudalmiddlefrontal      | 1.3 | ± 0.3 | 1.2 | ± 0.2 | 0.360 | 1.4 | ± 0.3 | 1.3 | ± 0.2 | 0.995 | 0.721 | 0.380 |
| 2005 | ctx-rh-cuneus                   | 1.8 | ± 0.4 | 1.7 | ± 0.3 | 0.467 | 1.5 | ± 0.3 | 1.5 | ± 0.2 | 0.397 | 0.071 | 0.198 |
| 2006 | ctx-rh-entorhinal               | 1.6 | ± 0.3 | 1.5 | ± 0.3 | 0.245 | 1.4 | ± 0.3 | 1.4 | ± 0.2 | 0.838 | 0.231 | 0.453 |
| 2032 | ctx-rh-frontalpole              | 1   | ± 0.2 | 1   | ± 0.2 | 0.847 | 1   | ± 0.3 | 1   | ± 0.2 | 0.726 | 0.607 | 0.613 |
| 2007 | ctx-rh-fusiform                 | 1.6 | ± 0.3 | 1.5 | ± 0.3 | 0.223 | 1.4 | ± 0.3 | 1.4 | ± 0.2 | 0.675 | 0.160 | 0.390 |
| 2008 | ctx-rh-inferiorparietal         | 1.4 | ± 0.3 | 1.3 | ± 0.3 | 0.206 | 1.2 | ± 0.3 | 1.2 | ± 0.2 | 0.943 | 0.297 | 0.712 |
| 2009 | ctx-rh-inferiortemporal         | 1.4 | ± 0.3 | 1.3 | ± 0.3 | 0.210 | 1.2 | ± 0.3 | 1.2 | ± 0.2 | 0.670 | 0.239 | 0.593 |
| 2035 | ctx-rh-insula                   | 1.5 | ± 0.3 | 1.4 | ± 0.3 | 0.273 | 1.3 | ± 0.3 | 1.3 | ± 0.2 | 0.774 | 0.217 | 0.551 |
| 2010 | ctx-rh-isthmuscingulate         | 2   | ± 0.5 | 1.9 | ± 0.3 | 0.333 | 1.7 | ± 0.3 | 1.8 | ± 0.2 | 0.777 | 0.153 | 0.423 |
| 2011 | ctx-rh-lateraloccipital         | 1.5 | ± 0.3 | 1.4 | ± 0.3 | 0.264 | 1.3 | ± 0.3 | 1.3 | ± 0.2 | 0.373 | 0.140 | 0.334 |
| 2012 | ctx-rh-lateralorbitofrontal     | 1.4 | ± 0.3 | 1.3 | ± 0.2 | 0.260 | 1.3 | ± 0.3 | 1.3 | ± 0.2 | 0.624 | 0.388 | 0.865 |
| 2013 | ctx-rh-lingual                  | 1.9 | ± 0.4 | 1.8 | ± 0.3 | 0.430 | 1.6 | ± 0.3 | 1.6 | ± 0.2 | 0.418 | 0.109 | 0.174 |
| 2014 | ctx-rh-medialorbitofrontal      | 1.3 | ± 0.3 | 1.2 | ± 0.2 | 0.350 | 1.2 | ± 0.3 | 1.2 | ± 0.2 | 0.617 | 0.673 | 0.921 |
| 2015 | ctx-rh-middletemporal           | 1.3 | ± 0.3 | 1.2 | ± 0.3 | 0.228 | 1.2 | ± 0.3 | 1.1 | ± 0.2 | 0.885 | 0.271 | 0.529 |
| 2017 | ctx-rh-paracentral              | 1.7 | ± 0.3 | 1.6 | ± 0.3 | 0.296 | 1.6 | ± 0.3 | 1.6 | ± 0.2 | 0.983 | 0.305 | 0.841 |
| 2016 | ctx-rh-parahippocampal          | 1.9 | ± 0.4 | 1.7 | ± 0.3 | 0.281 | 1.6 | ± 0.4 | 1.6 | ± 0.2 | 0.703 | 0.163 | 0.433 |
| 2018 | ctx-rh-parsopercularis          | 1.4 | ± 0.3 | 1.3 | ± 0.3 | 0.262 | 1.3 | ± 0.3 | 1.3 | ± 0.2 | 0.939 | 0.505 | 0.920 |
| 2019 | ctx-rh-parsorbitalis            | 1.2 | ± 0.2 | 1.1 | ± 0.2 | 0.408 | 1.1 | ± 0.2 | 1.1 | ± 0.2 | 0.792 | 0.701 | 0.953 |
| 2020 | ctx-rh-parstriangularis         | 1.3 | ± 0.3 | 1.2 | ± 0.3 | 0.292 | 1.2 | ± 0.3 | 1.2 | ± 0.2 | 0.941 | 0.771 | 0.867 |
| 2021 | ctx-rh-pericalcarine            | 1.9 | ± 0.4 | 1.8 | ± 0.3 | 0.408 | 1.6 | ± 0.3 | 1.6 | ± 0.2 | 0.236 | 0.052 | 0.089 |
| 2022 | ctx-rh-postcentral              | 1.5 | ± 0.3 | 1.4 | ± 0.3 | 0.250 | 1.4 | ± 0.3 | 1.4 | ± 0.2 | 0.922 | 0.645 | 0.853 |
| 2023 | ctx-rh-posteriorcingulate       | 1.7 | ± 0.4 | 1.6 | ± 0.3 | 0.418 | 1.5 | ± 0.3 | 1.5 | ± 0.2 | 0.946 | 0.210 | 0.487 |
| 2024 | ctx-rh-precentral               | 1.5 | ± 0.3 | 1.4 | ± 0.3 | 0.235 | 1.5 | ± 0.3 | 1.4 | ± 0.2 | 0.880 | 0.826 | 0.702 |
| 2025 | ctx-rh-precuneus                | 1.7 | ± 0.4 | 1.6 | ± 0.3 | 0.355 | 1.5 | ± 0.3 | 1.5 | ± 0.2 | 0.719 | 0.183 | 0.525 |
| 2026 | ctx-rh-rostralanteriorcingulate | 1.4 | ± 0.3 | 1.3 | ± 0.2 | 0.309 | 1.2 | ± 0.2 | 1.3 | ± 0.2 | 0.520 | 0.347 | 0.906 |
| 2027 | ctx-rh-rostralmiddlefrontal     | 1.1 | ± 0.2 | 1.1 | ± 0.2 | 0.503 | 1.2 | ± 0.3 | 1.2 | ± 0.2 | 0.925 | 0.784 | 0.546 |
| 2028 | ctx-rh-superiorfrontal          | 1.2 | ± 0.2 | 1.2 | ± 0.2 | 0.544 | 1.3 | ± 0.3 | 1.3 | ± 0.2 | 0.908 | 0.625 | 0.337 |
| 2029 | ctx-rh-superiorparietal         | 1.4 | ± 0.3 | 1.3 | ± 0.2 | 0.368 | 1.4 | ± 0.2 | 1.4 | ± 0.2 | 0.668 | 0.520 | 0.875 |
| 2030 | ctx-rh-superiortemporal         | 1.5 | ± 0.3 | 1.4 | ± 0.3 | 0.263 | 1.3 | ± 0.3 | 1.3 | ± 0.2 | 0.866 | 0.337 | 0.613 |
| 2031 | ctx-rh-supramarginal            | 1.4 | ± 0.3 | 1.3 | ± 0.3 | 0.245 | 1.3 | ± 0.3 | 1.3 | ± 0.2 | 0.928 | 0.595 | 0.932 |
| 2033 | ctx-rh-temporalpole             | 1.3 | ± 0.3 | 1.2 | ± 0.2 | 0.348 | 1.2 | ± 0.3 | 1.1 | ± 0.2 | 0.985 | 0.449 | 0.602 |
| 2034 | ctx-rh-transversetemporal       | 1.9 | ± 0.4 | 1.7 | ± 0.4 | 0.197 | 1.7 | ± 0.4 | 1.7 | ± 0.2 | 0.974 | 0.391 | 0.968 |

*Some white matter regions*

|      |                                |     |       |     |       |       |     |       |     |       |       |       |       |
|------|--------------------------------|-----|-------|-----|-------|-------|-----|-------|-----|-------|-------|-------|-------|
| 3002 | wm-lh-caudalanteriorcingulate  | 3.2 | ± 0.6 | 3   | ± 0.5 | 0.346 | 2.7 | ± 0.5 | 2.7 | ± 0.4 | 0.948 | 0.116 | 0.340 |
| 3003 | wm-lh-caudalmiddlefrontal      | 2.8 | ± 0.6 | 2.6 | ± 0.5 | 0.330 | 2.4 | ± 0.5 | 2.5 | ± 0.3 | 0.987 | 0.192 | 0.613 |
| 3005 | wm-lh-cuneus                   | 3   | ± 0.6 | 2.8 | ± 0.4 | 0.399 | 2.5 | ± 0.4 | 2.5 | ± 0.3 | 0.637 | 0.055 | 0.256 |
| 3006 | wm-lh-entorhinal               | 2.7 | ± 0.6 | 2.5 | ± 0.4 | 0.304 | 2.4 | ± 0.6 | 2.3 | ± 0.2 | 0.798 | 0.262 | 0.383 |
| 3032 | wm-lh-frontalpole              | 2.2 | ± 0.4 | 2.1 | ± 0.3 | 0.601 | 2   | ± 0.4 | 2   | ± 0.3 | 0.858 | 0.327 | 0.455 |
| 3007 | wm-lh-fusiform                 | 3.1 | ± 0.6 | 2.8 | ± 0.5 | 0.315 | 2.6 | ± 0.6 | 2.6 | ± 0.3 | 0.987 | 0.148 | 0.329 |
| 3008 | wm-lh-inferiorparietal         | 3   | ± 0.5 | 2.7 | ± 0.4 | 0.315 | 2.6 | ± 0.5 | 2.6 | ± 0.2 | 0.814 | 0.144 | 0.586 |
| 3009 | wm-lh-inferiortemporal         | 2.8 | ± 0.5 | 2.6 | ± 0.4 | 0.330 | 2.5 | ± 0.6 | 2.4 | ± 0.2 | 0.777 | 0.313 | 0.501 |
| 3035 | wm-lh-insula                   | 3   | ± 0.6 | 2.7 | ± 0.5 | 0.332 | 2.5 | ± 0.6 | 2.4 | ± 0.2 | 0.805 | 0.133 | 0.238 |
| 3010 | wm-lh-isthmuscingulate         | 3.5 | ± 0.7 | 3.3 | ± 0.6 | 0.297 | 3   | ± 0.6 | 3   | ± 0.3 | 0.903 | 0.126 | 0.402 |
| 3011 | wm-lh-lateraloccipital         | 2.9 | ± 0.6 | 2.7 | ± 0.4 | 0.472 | 2.5 | ± 0.4 | 2.5 | ± 0.3 | 0.442 | 0.107 | 0.321 |
| 3012 | wm-lh-lateralorbitofrontal     | 2.7 | ± 0.6 | 2.5 | ± 0.4 | 0.396 | 2.3 | ± 0.4 | 2.3 | ± 0.2 | 0.799 | 0.126 | 0.217 |
| 3013 | wm-lh-lingual                  | 3.1 | ± 0.6 | 2.9 | ± 0.5 | 0.377 | 2.6 | ± 0.5 | 2.6 | ± 0.3 | 0.646 | 0.110 | 0.349 |
| 3014 | wm-lh-medialorbitofrontal      | 2.7 | ± 0.5 | 2.5 | ± 0.4 | 0.396 | 2.4 | ± 0.4 | 2.3 | ± 0.3 | 0.926 | 0.184 | 0.431 |
| 3015 | wm-lh-middletemporal           | 2.8 | ± 0.6 | 2.6 | ± 0.5 | 0.337 | 2.5 | ± 0.6 | 2.4 | ± 0.3 | 0.847 | 0.274 | 0.528 |
| 3017 | wm-lh-paracentral              | 3   | ± 0.6 | 2.7 | ± 0.5 | 0.321 | 2.6 | ± 0.5 | 2.6 | ± 0.3 | 0.959 | 0.158 | 0.473 |
| 3016 | wm-lh-parahippocampal          | 3.1 | ± 0.6 | 2.9 | ± 0.5 | 0.291 | 2.8 | ± 0.7 | 2.8 | ± 0.3 | 0.883 | 0.310 | 0.634 |
| 3018 | wm-lh-parsopercularis          | 2.7 | ± 0.5 | 2.5 | ± 0.4 | 0.309 | 2.4 | ± 0.5 | 2.4 | ± 0.3 | 0.818 | 0.264 | 0.611 |
| 3019 | wm-lh-parsorbitalis            | 2.2 | ± 0.5 | 2.1 | ± 0.4 | 0.452 | 2.1 | ± 0.4 | 2   | ± 0.2 | 0.742 | 0.435 | 0.570 |
| 3020 | wm-lh-parstriangularis         | 2.6 | ± 0.6 | 2.4 | ± 0.4 | 0.351 | 2.3 | ± 0.5 | 2.2 | ± 0.2 | 0.776 | 0.213 | 0.402 |
| 3021 | wm-lh-pericalcarine            | 2.9 | ± 0.6 | 2.8 | ± 0.4 | 0.441 | 2.3 | ± 0.4 | 2.4 | ± 0.3 | 0.484 | 0.030 | 0.090 |
| 3022 | wm-lh-postcentral              | 2.7 | ± 0.5 | 2.4 | ± 0.4 | 0.272 | 2.4 | ± 0.5 | 2.5 | ± 0.3 | 0.996 | 0.402 | 0.907 |
| 3023 | wm-lh-posteriorcingulate       | 3.3 | ± 0.7 | 3   | ± 0.5 | 0.277 | 2.8 | ± 0.5 | 2.8 | ± 0.3 | 0.973 | 0.080 | 0.321 |
| 3024 | wm-lh-precentral               | 2.8 | ± 0.5 | 2.5 | ± 0.4 | 0.267 | 2.5 | ± 0.5 | 2.5 | ± 0.3 | 0.892 | 0.247 | 0.712 |
| 3025 | wm-lh-precuneus                | 3.2 | ± 0.6 | 3   | ± 0.5 | 0.358 | 2.7 | ± 0.5 | 2.7 | ± 0.3 | 0.914 | 0.092 | 0.276 |
| 3026 | wm-lh-rostralanteriorcingulate | 3   | ± 0.6 | 2.8 | ± 0.5 | 0.360 | 2.5 | ± 0.4 | 2.5 | ± 0.3 | 0.951 | 0.058 | 0.205 |
| 3027 | wm-lh-rostralmiddlefrontal     | 2.6 | ± 0.5 | 2.4 | ± 0.4 | 0.454 | 2.3 | ± 0.4 | 2.3 | ± 0.2 | 0.860 | 0.277 | 0.518 |
| 3028 | wm-lh-superiorfrontal          | 2.7 | ± 0.5 | 2.5 | ± 0.4 | 0.426 | 2.5 | ± 0.5 | 2.5 | ± 0.3 | 0.918 | 0.369 | 0.747 |
| 3029 | wm-lh-superiorparietal         | 3   | ± 0.6 | 2.7 | ± 0.4 | 0.339 | 2.6 | ± 0.5 | 2.6 | ± 0.3 | 0.848 | 0.176 | 0.590 |
| 3030 | wm-lh-superiortemporal         | 2.9 | ± 0.6 | 2.7 | ± 0.5 | 0.302 | 2.6 | ± 0.6 | 2.5 | ± 0.2 | 0.732 | 0.288 | 0.497 |
| 3031 | wm-lh-supramarginal            | 2.9 | ± 0.5 | 2.7 | ± 0.4 | 0.304 | 2.6 | ± 0.6 | 2.6 | ± 0.2 | 0.945 | 0.216 | 0.576 |
| 3033 | wm-lh-temporalpole             | 2.3 | ± 0.4 | 2.1 | ± 0.3 | 0.281 | 2.2 | ± 0.5 | 2.1 | ± 0.2 | 0.759 | 0.544 | 0.955 |

|      |                                |     |       |     |       |       |     |       |     |       |       |       |       |
|------|--------------------------------|-----|-------|-----|-------|-------|-----|-------|-----|-------|-------|-------|-------|
| 3034 | wm-lh-transversetemporal       | 3   | ± 0.6 | 2.8 | ± 0.5 | 0.306 | 2.7 | ± 0.6 | 2.7 | ± 0.3 | 0.863 | 0.300 | 0.634 |
| 4001 | wm-rh-bankssts                 | 3.2 | ± 0.7 | 2.9 | ± 0.6 | 0.298 | 2.6 | ± 0.6 | 2.6 | ± 0.3 | 0.880 | 0.084 | 0.207 |
| 4002 | wm-rh-caudalanteriorcingulate  | 3.2 | ± 0.6 | 3   | ± 0.5 | 0.324 | 2.7 | ± 0.5 | 2.7 | ± 0.4 | 0.896 | 0.086 | 0.271 |
| 4003 | wm-rh-caudalmiddlefrontal      | 2.9 | ± 0.6 | 2.7 | ± 0.4 | 0.334 | 2.5 | ± 0.4 | 2.4 | ± 0.3 | 0.861 | 0.118 | 0.343 |
| 4005 | wm-rh-cuneus                   | 3   | ± 0.6 | 2.8 | ± 0.4 | 0.396 | 2.5 | ± 0.5 | 2.5 | ± 0.4 | 0.595 | 0.050 | 0.223 |
| 4006 | wm-rh-entorhinal               | 2.8 | ± 0.6 | 2.5 | ± 0.5 | 0.272 | 2.4 | ± 0.5 | 2.3 | ± 0.3 | 0.704 | 0.181 | 0.320 |
| 4032 | wm-rh-frontalpole              | 2.3 | ± 0.4 | 2.2 | ± 0.4 | 0.595 | 2   | ± 0.3 | 2   | ± 0.3 | 0.788 | 0.169 | 0.356 |
| 4007 | wm-rh-fusiform                 | 3.1 | ± 0.6 | 2.9 | ± 0.5 | 0.305 | 2.5 | ± 0.5 | 2.5 | ± 0.3 | 0.875 | 0.054 | 0.178 |
| 4008 | wm-rh-inferiorparietal         | 3   | ± 0.6 | 2.7 | ± 0.5 | 0.319 | 2.4 | ± 0.5 | 2.4 | ± 0.3 | 0.980 | 0.053 | 0.195 |
| 4009 | wm-rh-inferiortemporal         | 2.9 | ± 0.5 | 2.6 | ± 0.5 | 0.291 | 2.4 | ± 0.5 | 2.4 | ± 0.3 | 0.901 | 0.105 | 0.319 |
| 4035 | wm-rh-insula                   | 3   | ± 0.6 | 2.8 | ± 0.5 | 0.313 | 2.5 | ± 0.5 | 2.5 | ± 0.3 | 0.869 | 0.103 | 0.267 |
| 4010 | wm-rh-isthmuscingulate         | 3.6 | ± 0.7 | 3.3 | ± 0.6 | 0.334 | 3   | ± 0.6 | 3   | ± 0.3 | 0.986 | 0.071 | 0.233 |
| 4011 | wm-rh-lateraloccipital         | 2.9 | ± 0.6 | 2.7 | ± 0.4 | 0.358 | 2.3 | ± 0.4 | 2.4 | ± 0.3 | 0.510 | 0.043 | 0.153 |
| 4012 | wm-rh-lateralorbitofrontal     | 2.9 | ± 0.6 | 2.7 | ± 0.5 | 0.327 | 2.4 | ± 0.4 | 2.4 | ± 0.3 | 0.976 | 0.066 | 0.219 |
| 4013 | wm-rh-lingual                  | 3.1 | ± 0.6 | 2.9 | ± 0.5 | 0.365 | 2.5 | ± 0.5 | 2.6 | ± 0.4 | 0.603 | 0.050 | 0.205 |
| 4014 | wm-rh-medialorbitofrontal      | 2.7 | ± 0.5 | 2.6 | ± 0.4 | 0.376 | 2.4 | ± 0.4 | 2.4 | ± 0.3 | 0.982 | 0.112 | 0.353 |
| 4015 | wm-rh-middletemporal           | 2.9 | ± 0.6 | 2.6 | ± 0.5 | 0.321 | 2.4 | ± 0.5 | 2.4 | ± 0.3 | 0.893 | 0.121 | 0.280 |
| 4017 | wm-rh-paracentral              | 3.1 | ± 0.6 | 2.8 | ± 0.5 | 0.321 | 2.6 | ± 0.5 | 2.6 | ± 0.3 | 0.892 | 0.082 | 0.274 |
| 4016 | wm-rh-parahippocampal          | 3.2 | ± 0.6 | 3   | ± 0.6 | 0.277 | 2.8 | ± 0.6 | 2.8 | ± 0.4 | 0.982 | 0.198 | 0.546 |
| 4018 | wm-rh-parsopercularis          | 2.9 | ± 0.6 | 2.7 | ± 0.5 | 0.330 | 2.5 | ± 0.5 | 2.5 | ± 0.3 | 0.830 | 0.102 | 0.273 |
| 4019 | wm-rh-parsorbitalis            | 2.5 | ± 0.5 | 2.4 | ± 0.4 | 0.419 | 2.2 | ± 0.4 | 2.2 | ± 0.3 | 0.929 | 0.151 | 0.335 |
| 4020 | wm-rh-parstriangularis         | 2.8 | ± 0.6 | 2.6 | ± 0.5 | 0.334 | 2.4 | ± 0.4 | 2.3 | ± 0.3 | 0.844 | 0.101 | 0.257 |
| 4021 | wm-rh-pericalcarine            | 2.9 | ± 0.6 | 2.7 | ± 0.4 | 0.356 | 2.3 | ± 0.4 | 2.3 | ± 0.3 | 0.596 | 0.023 | 0.079 |
| 4022 | wm-rh-postcentral              | 2.8 | ± 0.5 | 2.6 | ± 0.5 | 0.306 | 2.4 | ± 0.5 | 2.4 | ± 0.3 | 0.836 | 0.205 | 0.518 |
| 4023 | wm-rh-posteriorcingulate       | 3.4 | ± 0.7 | 3.1 | ± 0.6 | 0.304 | 2.8 | ± 0.5 | 2.8 | ± 0.4 | 0.947 | 0.070 | 0.289 |
| 4024 | wm-rh-precentral               | 2.9 | ± 0.6 | 2.6 | ± 0.5 | 0.303 | 2.5 | ± 0.5 | 2.4 | ± 0.3 | 0.836 | 0.138 | 0.396 |
| 4025 | wm-rh-precuneus                | 3.2 | ± 0.6 | 3   | ± 0.5 | 0.351 | 2.6 | ± 0.5 | 2.6 | ± 0.3 | 0.822 | 0.041 | 0.169 |
| 4026 | wm-rh-rostralanteriorcingulate | 3.1 | ± 0.6 | 2.9 | ± 0.5 | 0.385 | 2.5 | ± 0.4 | 2.5 | ± 0.3 | 0.900 | 0.047 | 0.177 |
| 4027 | wm-rh-rostralmiddlefrontal     | 2.7 | ± 0.5 | 2.5 | ± 0.4 | 0.439 | 2.4 | ± 0.4 | 2.4 | ± 0.3 | 0.906 | 0.168 | 0.369 |
| 4028 | wm-rh-superiorfrontal          | 2.7 | ± 0.5 | 2.5 | ± 0.4 | 0.425 | 2.4 | ± 0.4 | 2.4 | ± 0.3 | 0.937 | 0.249 | 0.596 |
| 4029 | wm-rh-superiorparietal         | 3   | ± 0.6 | 2.8 | ± 0.5 | 0.357 | 2.5 | ± 0.4 | 2.5 | ± 0.3 | 0.903 | 0.067 | 0.255 |
| 4030 | wm-rh-superiortemporal         | 3   | ± 0.6 | 2.7 | ± 0.5 | 0.308 | 2.5 | ± 0.6 | 2.5 | ± 0.3 | 0.814 | 0.163 | 0.364 |
| 4031 | wm-rh-supramarginal            | 3   | ± 0.6 | 2.8 | ± 0.5 | 0.338 | 2.5 | ± 0.5 | 2.5 | ± 0.3 | 0.821 | 0.106 | 0.246 |
| 4033 | wm-rh-temporalpole             | 2.5 | ± 0.5 | 2.3 | ± 0.5 | 0.306 | 2.2 | ± 0.4 | 2.1 | ± 0.3 | 0.801 | 0.197 | 0.473 |



|                                            |                          |     |       |     |       |       |     |       |     |       |       |       |       |
|--------------------------------------------|--------------------------|-----|-------|-----|-------|-------|-----|-------|-----|-------|-------|-------|-------|
| 4034                                       | wm-rh-transversetemporal | 3.1 | ± 0.7 | 2.9 | ± 0.6 | 0.290 | 2.7 | ± 0.6 | 2.6 | ± 0.4 | 0.858 | 0.171 | 0.440 |
| <b><i>Other selected brain regions</i></b> |                          |     |       |     |       |       |     |       |     |       |       |       |       |
| 85                                         | Optic-Chiasm             | 2.8 | ± 0.7 | 2.4 | ± 0.5 | 0.106 | 2.3 | ± 0.5 | 2.2 | ± 0.2 | 0.783 | 0.062 | 0.299 |
| 16                                         | Brain-Stem               | 3.1 | ± 0.6 | 2.8 | ± 0.5 | 0.318 | 2.7 | ± 0.6 | 2.7 | ± 0.3 | 0.932 | 0.260 | 0.507 |
| 255                                        | CC_Anterior              | 3.3 | ± 0.7 | 3.1 | ± 0.5 | 0.332 | 2.7 | ± 0.5 | 2.7 | ± 0.3 | 0.825 | 0.048 | 0.133 |
| 253                                        | CC_Central               | 3.4 | ± 0.7 | 3.1 | ± 0.6 | 0.226 | 2.5 | ± 0.7 | 2.4 | ± 0.5 | 0.811 | 0.025 | 0.066 |
| 254                                        | CC_Mid_Anterior          | 3.3 | ± 0.7 | 3   | ± 0.6 | 0.289 | 2.6 | ± 0.6 | 2.5 | ± 0.3 | 0.811 | 0.046 | 0.088 |
| 252                                        | CC_Mid_Posterior         | 3.4 | ± 0.8 | 3.1 | ± 0.6 | 0.281 | 2.5 | ± 0.6 | 2.4 | ± 0.4 | 0.999 | 0.017 | 0.035 |
| 251                                        | CC_Posterior             | 3.7 | ± 0.8 | 3.4 | ± 0.6 | 0.300 | 2.5 | ± 0.6 | 2.5 | ± 0.3 | 0.869 | 0.004 | 0.011 |
| 13, 52                                     | Pallidum                 | 3.3 | ± 0.7 | 3.1 | ± 0.6 | 0.305 | 2.9 | ± 0.6 | 2.8 | ± 0.3 | 0.730 | 0.173 | 0.313 |
| 12, 51                                     | Putamen                  | 2.4 | ± 0.5 | 2.3 | ± 0.4 | 0.304 | 2.1 | ± 0.4 | 2.1 | ± 0.3 | 0.997 | 0.174 | 0.453 |
| 10, 49                                     | Thalamus-Proper          | 2.9 | ± 0.6 | 2.7 | ± 0.5 | 0.290 | 2.4 | ± 0.5 | 2.4 | ± 0.3 | 0.896 | 0.066 | 0.185 |
| 11, 50                                     | Caudate                  | 2.2 | ± 0.5 | 2   | ± 0.4 | 0.263 | 1.8 | ± 0.4 | 1.8 | ± 0.3 | 0.994 | 0.104 | 0.372 |
| 26, 58                                     | Accumbens-area           | 2.2 | ± 0.5 | 2   | ± 0.4 | 0.230 | 1.9 | ± 0.4 | 1.9 | ± 0.2 | 0.784 | 0.165 | 0.618 |
| 18, 54                                     | Amygdala                 | 1.9 | ± 0.4 | 1.8 | ± 0.3 | 0.234 | 1.7 | ± 0.4 | 1.7 | ± 0.2 | 0.970 | 0.233 | 0.530 |
| 17, 53                                     | Hippocampus              | 2   | ± 0.4 | 1.8 | ± 0.3 | 0.238 | 1.7 | ± 0.4 | 1.7 | ± 0.2 | 0.889 | 0.240 | 0.652 |

Data presented as mean ± standard deviation. \*Sign.: Significant differences over time was assessed by a linear mixed model for repeated measurements. The difference between the REF and the iNPH groups at pre and at 4 weeks was assessed with a independent samples students t-test. SegID – FreeSurfer segmentation identity; Ctx - Cortex; lh – left hemisphere; rh – right hemisphere; wm – white matter; CC – corpus callosum; CSF – cerebrospinal fluid.
